# Supplementary material for: Sodium complexes as precise tools for cutting polymer chains. Exploration of PLA degradation by unique cooperation of sodium centers
Source: Royal Society of Chemistry journal article supplement (doi:10.1039/d2qi01938h), 2022-12-13
Supplement: d2qi01938h1.pdf [file d2qi01938h1.pdf]

## Supporting Information

### **Sodium Complexes as Precise Tools for Cutting Polymer Chains. Exploration of PLA Degradation by Unique Cooperation of Sodium Centers**

Edyta Nizioł,<sup>a</sup> Dawid Jędrzkiewicz,<sup>a</sup> Agata Wiencierz,<sup>a</sup> Wojciech Paś,<sup>a</sup> Danuta Trybuła,<sup>a</sup> Wiktor Zierkiewicz<sup>b</sup> Aleksandra Marszałek-Harych<sup>a</sup> and Jolanta Ejfler\*<sup>a</sup>

---

<sup>a</sup>Faculty of Chemistry, University of Wrocław, 14 F. Joliot-Curie, 50-383 Wrocław, Poland, E-mail: jolanta.ejfler@chem.uni.wroc.pl

<sup>b</sup>Faculty of Chemistry, Wrocław University of Science and Technology, 27 Wybrzeże Wyspiańskiego, 50-370 Wrocław, Poland

---

| Table of Contents                                                                                                                                                                                                                                                               | Page |
|---------------------------------------------------------------------------------------------------------------------------------------------------------------------------------------------------------------------------------------------------------------------------------|------|
| <b>Figure S1.</b> $^1\text{H}$ NMR of ${}_{2np}\text{L}^{\text{Bn}}\text{-H}$ ( $\text{C}_6\text{D}_6$ ).                                                                                                                                                                       | 2    |
| <b>Figure S2.</b> $^{13}\text{C}$ NMR of ${}_{2np}\text{L}^{\text{Bn}}\text{-H}$ ( $\text{C}_6\text{D}_6$ ).                                                                                                                                                                    | 2    |
| <b>Figure S3.</b> $^1\text{H}$ NMR of ${}_{1np}\text{L}^{\text{Bn}}\text{-H}$ ( $\text{C}_6\text{D}_6$ ).                                                                                                                                                                       | 3    |
| <b>Figure S4.</b> $^{13}\text{C}$ NMR of ${}_{1np}\text{L}^{\text{Bn}}\text{-H}$ ( $\text{C}_6\text{D}_6$ ).                                                                                                                                                                    | 3    |
| <b>Figure S5.</b> $^1\text{H}$ NMR of $[(2\text{-npL}^{\text{Bn}})\text{-Na}]_4$ ( $\text{C}_6\text{D}_6$ ).                                                                                                                                                                    | 4    |
| <b>Figure S6.</b> $^{13}\text{C}$ NMR of $[(2\text{-npL}^{\text{Bn}})\text{-Na}]_4$ ( $\text{C}_6\text{D}_6$ ).                                                                                                                                                                 | 4    |
| <b>Figure S7.</b> $^1\text{H}$ NMR of $[(1\text{-npL}^{\text{Bn}})\text{-Na}(\text{THF})_{0.5}]_4$ ( $\text{C}_6\text{D}_6$ ).                                                                                                                                                  | 5    |
| <b>Figure S8.</b> $^{13}\text{C}$ NMR of $[(1\text{-npL}^{\text{Bn}})\text{-Na}(\text{THF})_{0.5}]_4$ ( $\text{C}_6\text{D}_6$ ).                                                                                                                                               | 5    |
| <b>Figure S9.</b> $^1\text{H}$ NMR of $[(d\text{-tbL}^{\text{Bn}})\text{-Na}(\text{THF})]_2$ ( $\text{C}_6\text{D}_6$ ).                                                                                                                                                        | 6    |
| <b>Figure S10.</b> $^{13}\text{C}$ NMR of $[(d\text{-tbL}^{\text{Bn}})\text{-Na}(\text{THF})]_2$ ( $\text{C}_6\text{D}_6$ ).                                                                                                                                                    | 6    |
| <b>Figure S11.</b> Fragment of $^1\text{H}$ NMR spectrum for 0.25 eq. $[(2\text{-npL}^{\text{Bn}})\text{-Na}(\text{THF})]_4$ with 1.0 eq. PLA-100-DR1 ( $\text{C}_6\text{D}_6$ ).                                                                                               | 7    |
| <b>Figure S12.</b> Fragment of $^1\text{H}$ NMR spectrum for 0.25 eq. $[(1\text{-npL}^{\text{Bn}})\text{-Na}(\text{THF})_{0.5}]_4$ with 1.0 eq. PLA-100-DR1 ( $\text{C}_6\text{D}_6$ ).                                                                                         | 7    |
| <b>Figure S13.</b> DOSY NMR spectrum of $[(2\text{-npL}^{\text{Bn}})\text{Na}(\text{THF})]_4$ ( $\text{C}_6\text{D}_6$ ).                                                                                                                                                       | 8    |
| <b>Figure S14.</b> Deconvoluted homonuclear decoupled $^1\text{H}$ NMR of the methine region of isotactic depolymerized PLA produced by $[(2\text{-npL}^{\text{Bn}})\text{Na}]_4$ ( $\text{CDCl}_3$ ).                                                                          | 8    |
| <b>Figure S15.</b> Van der Waals surface generated around DFT optimized $[(1\text{-npL}^{\text{Bn}})\text{Na}(\text{THF})_{0.5}]_4$ structure.                                                                                                                                  | 8    |
| <b>Table S1.</b> X-ray experimental data and refinement for $[(2\text{-npL}^{\text{Bn}})\text{-Na}(\text{THF})]_4$ and $[(1\text{-npL}^{\text{Bn}})\text{-Na}(\text{THF})_{0.5}]_4$ .                                                                                           | 9    |
| <b>Table S2.</b> Selected bond distances (Å) and angles (°) for $[(2\text{-npL}^{\text{Bn}})\text{-Na}(\text{THF})]_4$ .                                                                                                                                                        | 9    |
| <b>Table S3.</b> Selected bond distances (Å) and angles (°) for $[(1\text{-npL}^{\text{Bn}})\text{-Na}(\text{THF})_{0.5}]_4$ .                                                                                                                                                  | 10   |
| <b>Table S4.</b> Energies of calculated models for transformation pathways from “closed” $[(d\text{-tbL}^{\text{Bn}})\text{Na}(\text{THF})]_2$ to “opened” $[(d\text{-tbL}^{\text{Bn}})\text{Na}(\text{THF})]_2$ structures. Data are given in kcal/mol.                        | 11   |
| <b>Table S5.</b> Energies of calculated models for proposed mechanism of the reaction between $[(d\text{-tbL}^{\text{Bn}})\text{Na}(\text{THF})]_2$ and methanol in gas phase and in Polarizable Continuum Model with dichloromethane as a solvent. Data are given in kcal/mol. | 11   |
| <b>Table S6.</b> Energies of calculated models for proposed compounds obtained between $[(d\text{-tbL}^{\text{Bn}})\text{Na}(\text{THF})]_2$ and methyl lactate. Data are given in kcal/mol.                                                                                    | 12   |
| <b>Table S7.</b> Energies of calculated models for proposed polylactide degradation process by using sodium compounds. Data are given in kcal/mol.                                                                                                                              | 12   |
| <b>Table S8.</b> DFT optimized structures and atom coordinates of complexes for transformation pathways from “closed” $[(d\text{-tbL}^{\text{Bn}})\text{Na}(\text{THF})]_2$ to “opened” $[(d\text{-tbL}^{\text{Bn}})\text{Na}(\text{THF})]_2$ structures.                       | 12   |
| <b>Table S9.</b> DFT optimized structures and atom coordinates of complexes for proposed mechanism of the reaction between $[(d\text{-tbL}^{\text{Bn}})\text{Na}(\text{THF})]_2$ and methanol.                                                                                  | 19   |
| <b>Table S10.</b> DFT optimized structures and atom coordinates of proposed complexes obtained between $[(d\text{-tbL}^{\text{Bn}})\text{Na}(\text{THF})]_2$ and methyl lactate.                                                                                                | 26   |
| <b>Table S11.</b> DFT optimized structures and atom coordinates of complexes for proposed polylactide degradation process by using sodium compounds.                                                                                                                            | 33   |
| CHECKCIF Alert B explanation for crystal structures.                                                                                                                                                                                                                            | 43   |

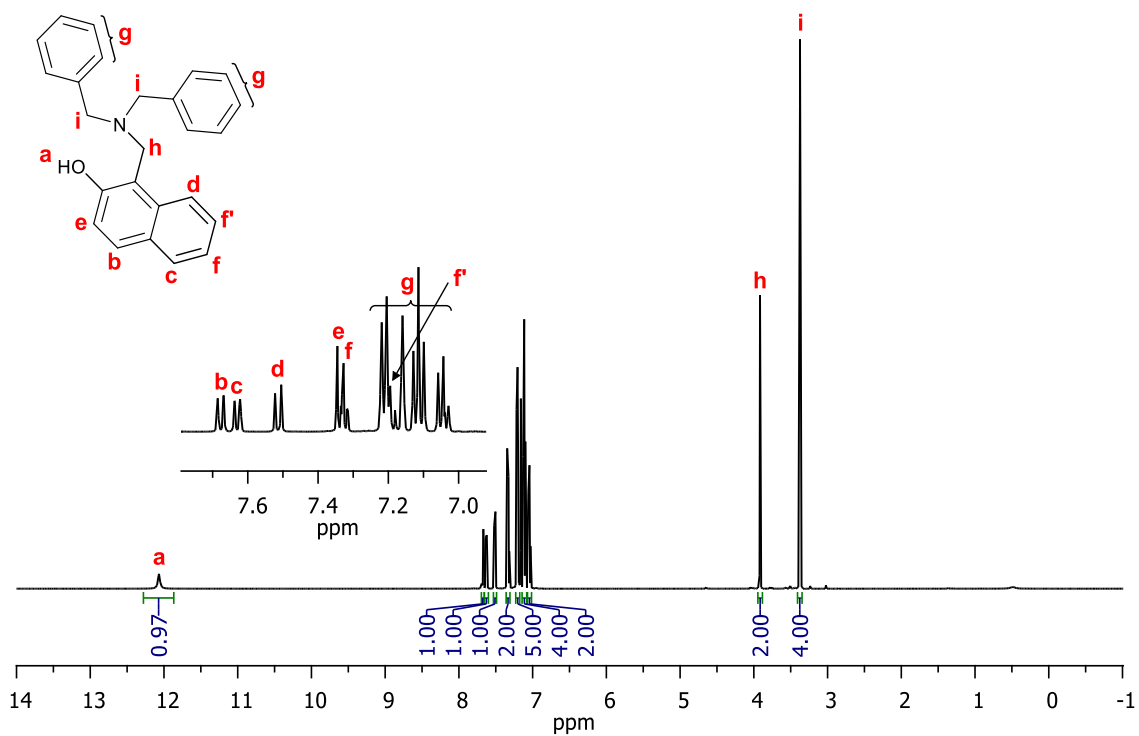

Figure S1.  $^1\text{H}$  NMR of  ${}_{2np}\text{L}^{\text{Bn}}\text{-H}$  ( $\text{C}_6\text{D}_6$ ).

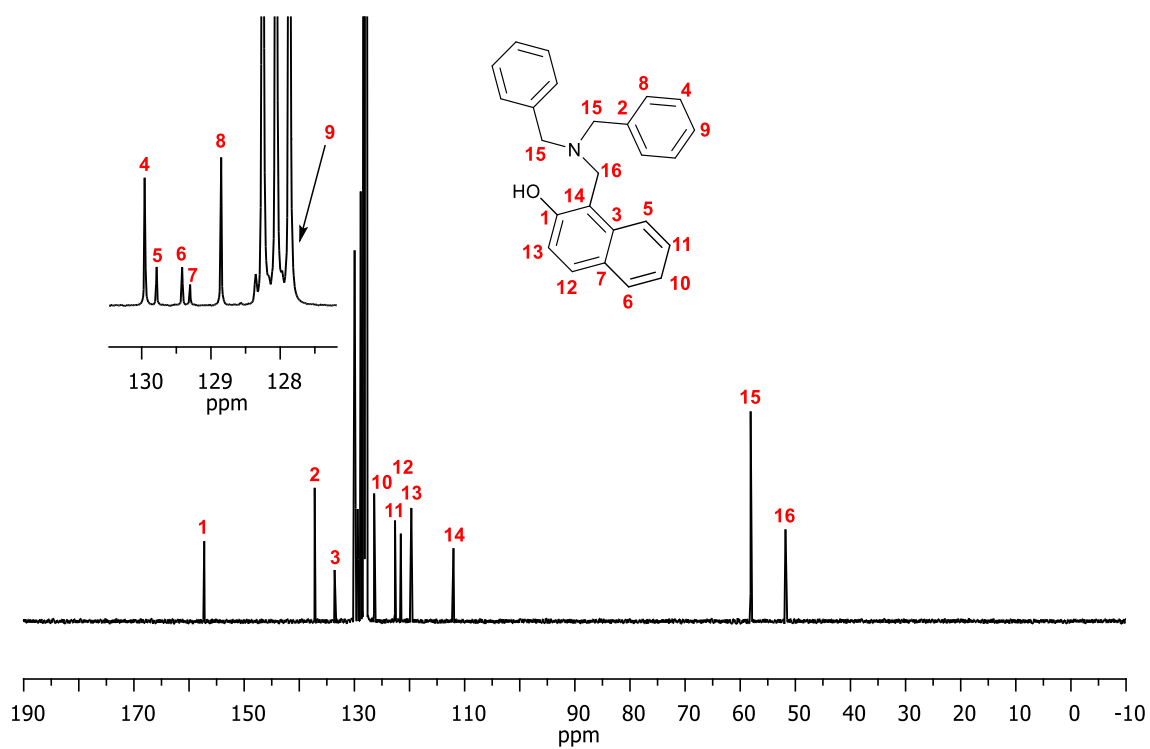

Figure S2.  $^{13}\text{C}$  NMR of  ${}_{2np}\text{L}^{\text{Bn}}\text{-H}$  ( $\text{C}_6\text{D}_6$ ).

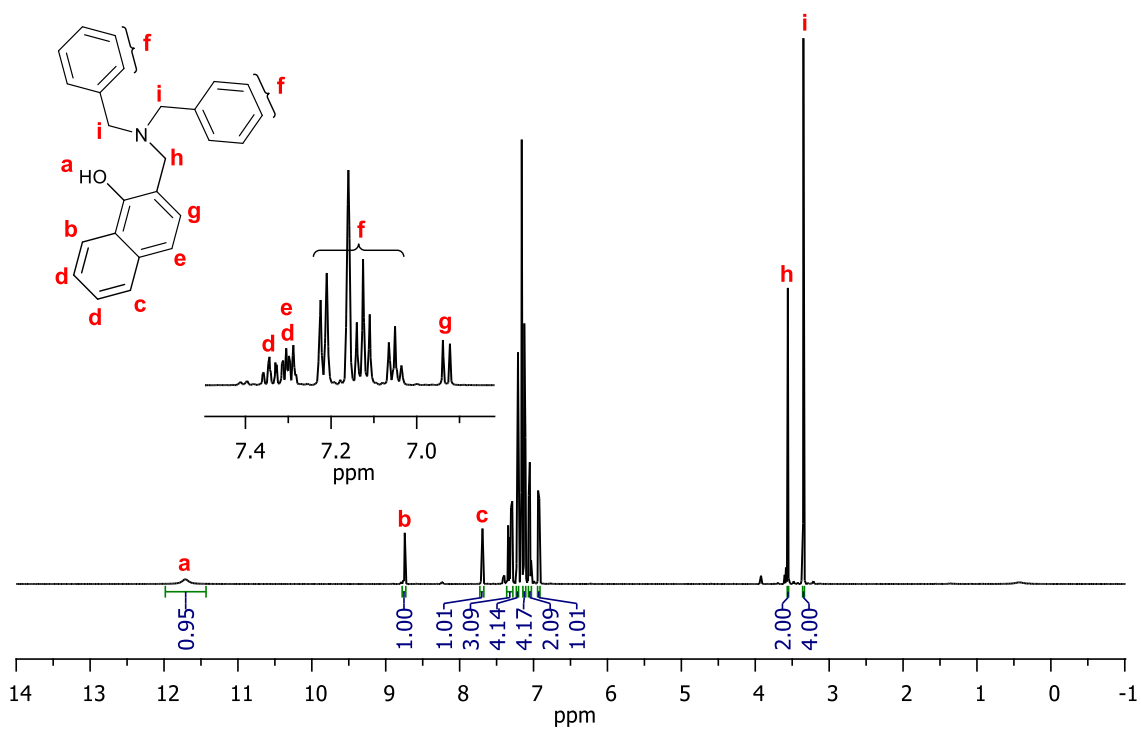

Figure S3.  $^1\text{H}$  NMR of  ${}_{1np}\text{L}^{\text{Bn}}\text{-H}$  ( $\text{C}_6\text{D}_6$ ).

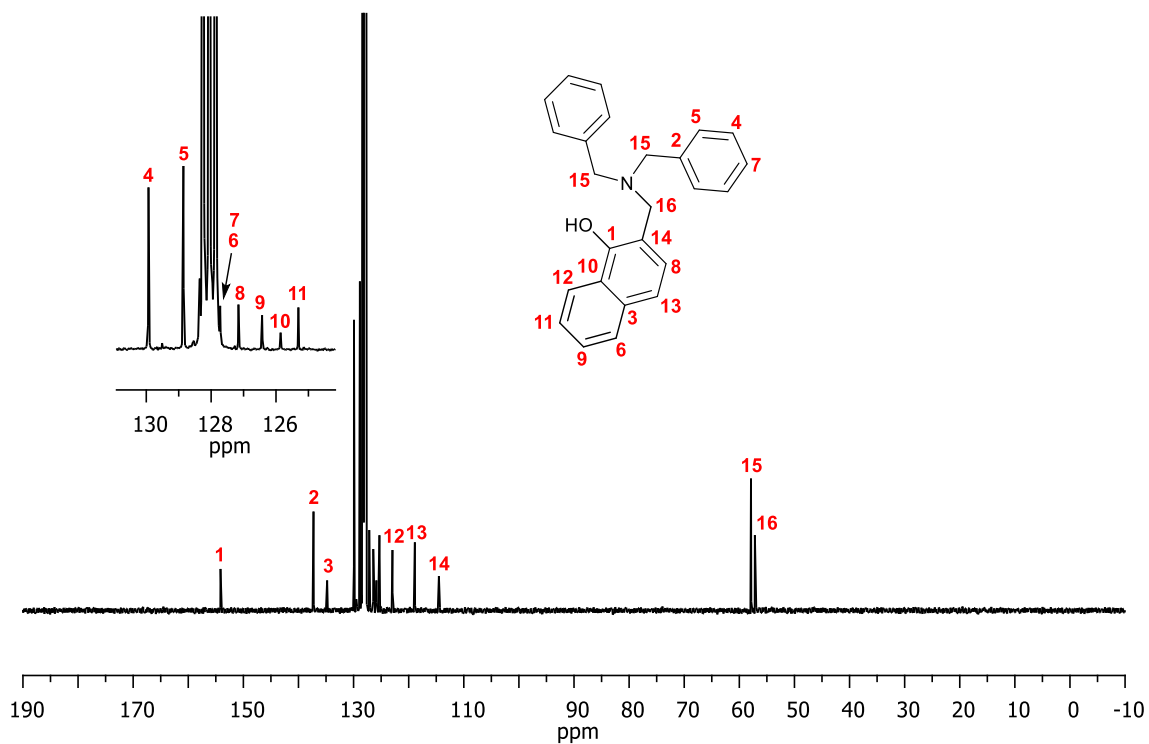

Figure S4.  $^{13}\text{C}$  NMR of  ${}_{1np}\text{L}^{\text{Bn}}\text{-H}$  ( $\text{C}_6\text{D}_6$ ).

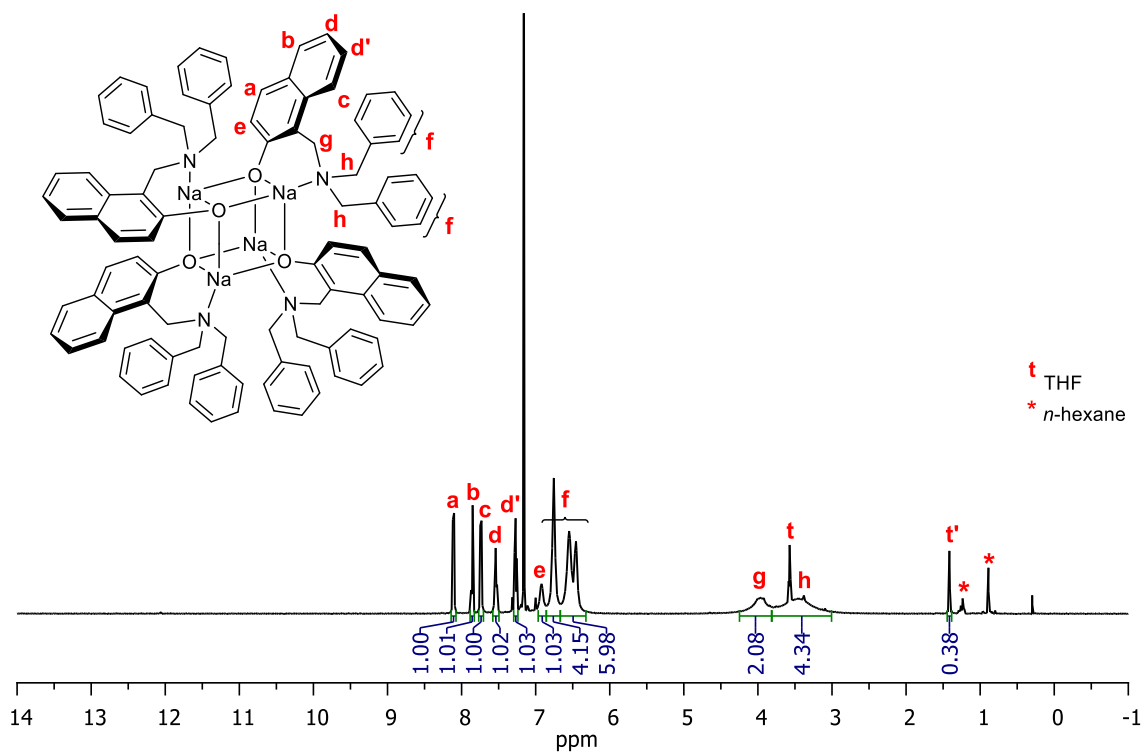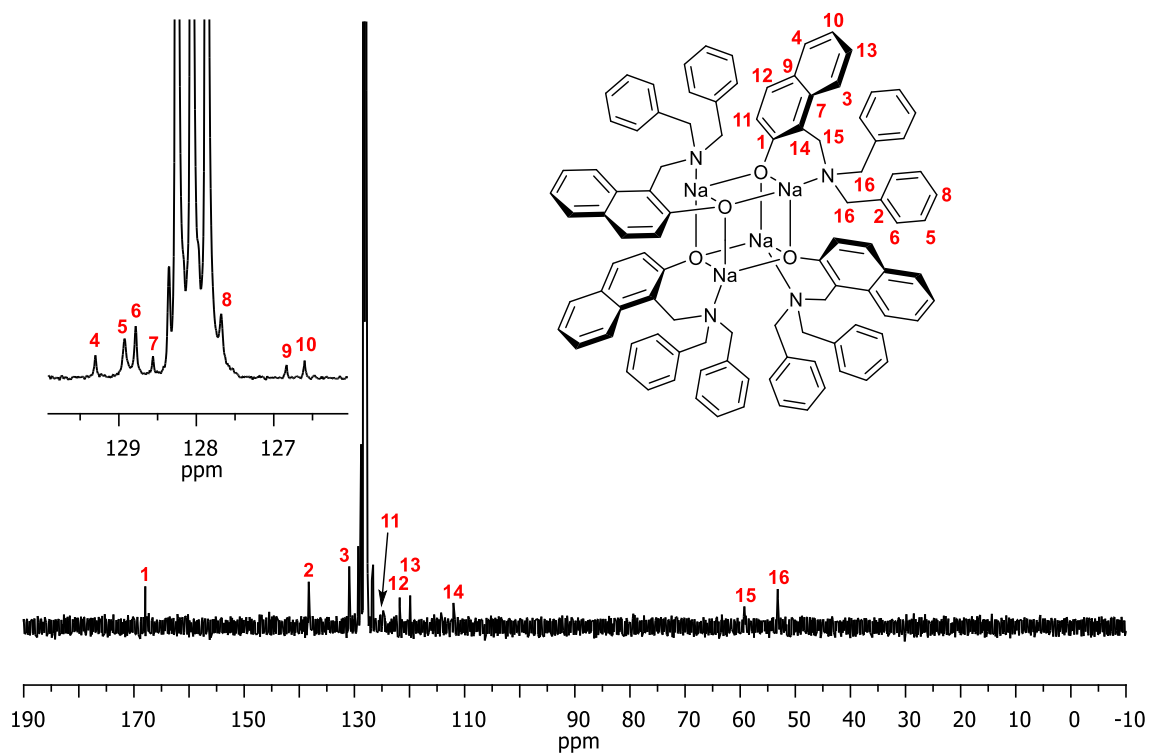

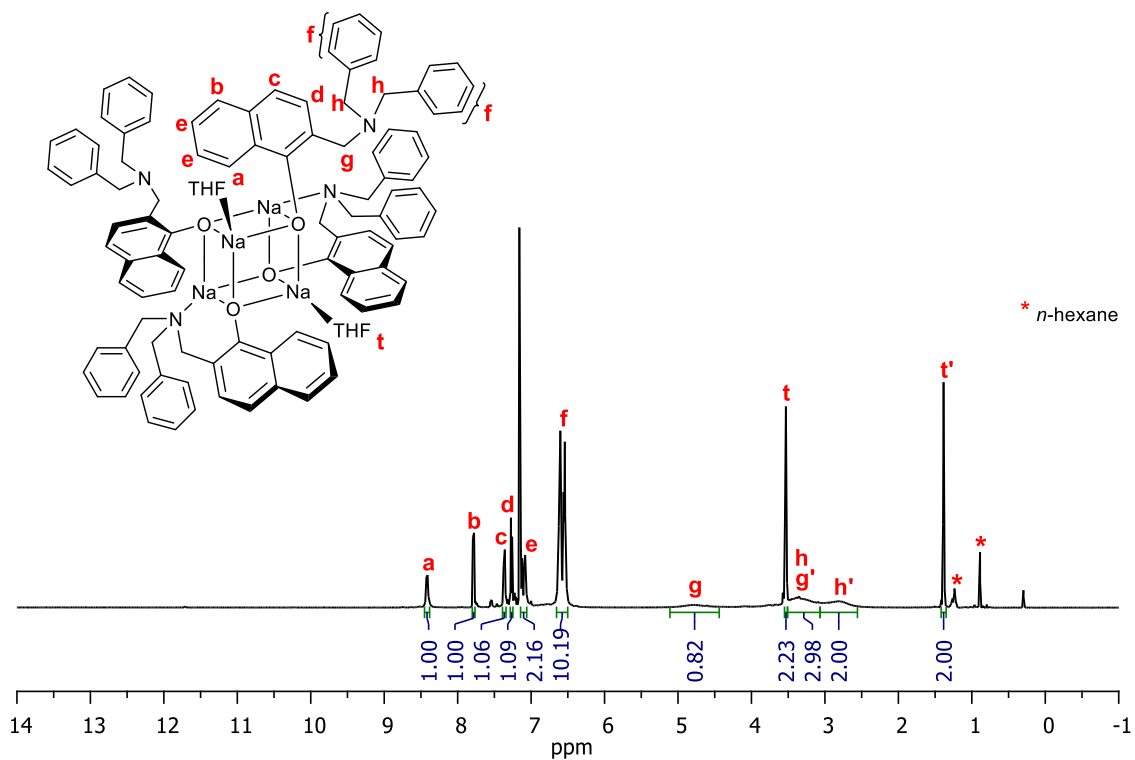

Figure S7.  $^1\text{H}$  NMR of  $[(1\text{-npL}^{\text{Bn}})\text{-Na(THF)}_{0.5}]_4$  ( $\text{C}_6\text{D}_6$ ).

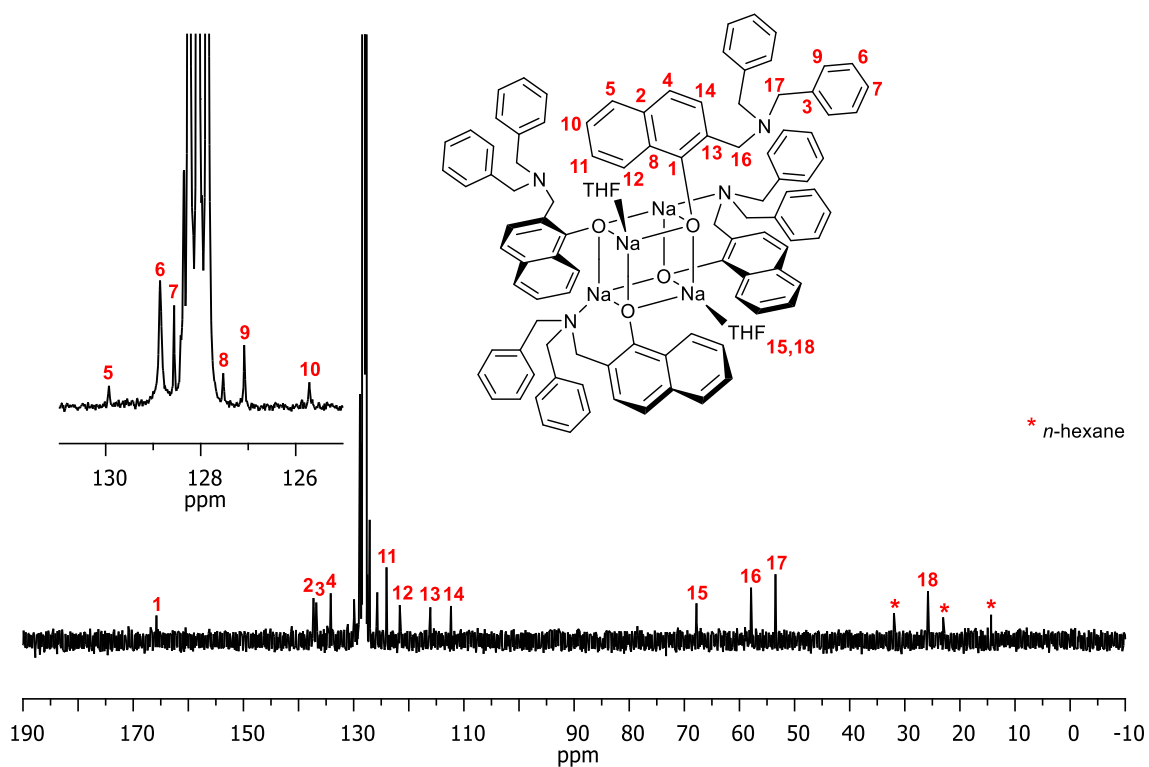

Figure S8.  $^{13}\text{C}$  NMR of  $[(1\text{-npL}^{\text{Bn}})\text{-Na(THF)}_{0.5}]_4$  ( $\text{C}_6\text{D}_6$ ).

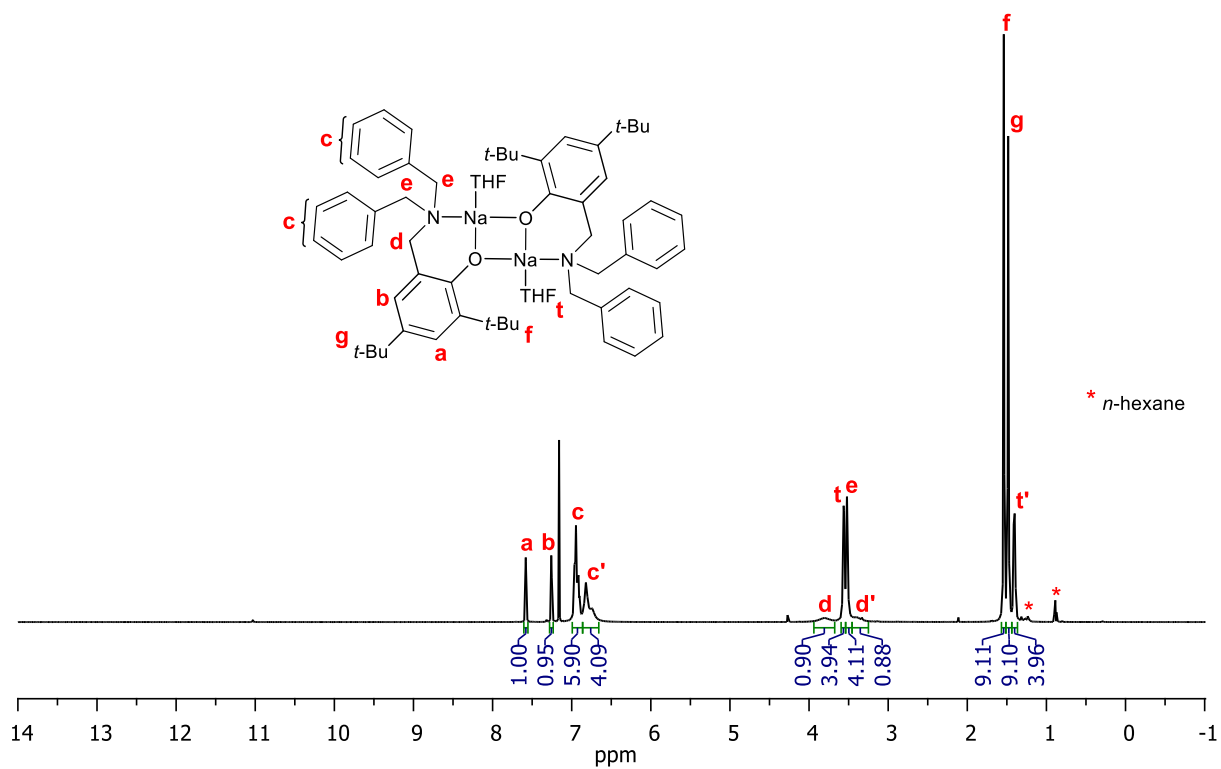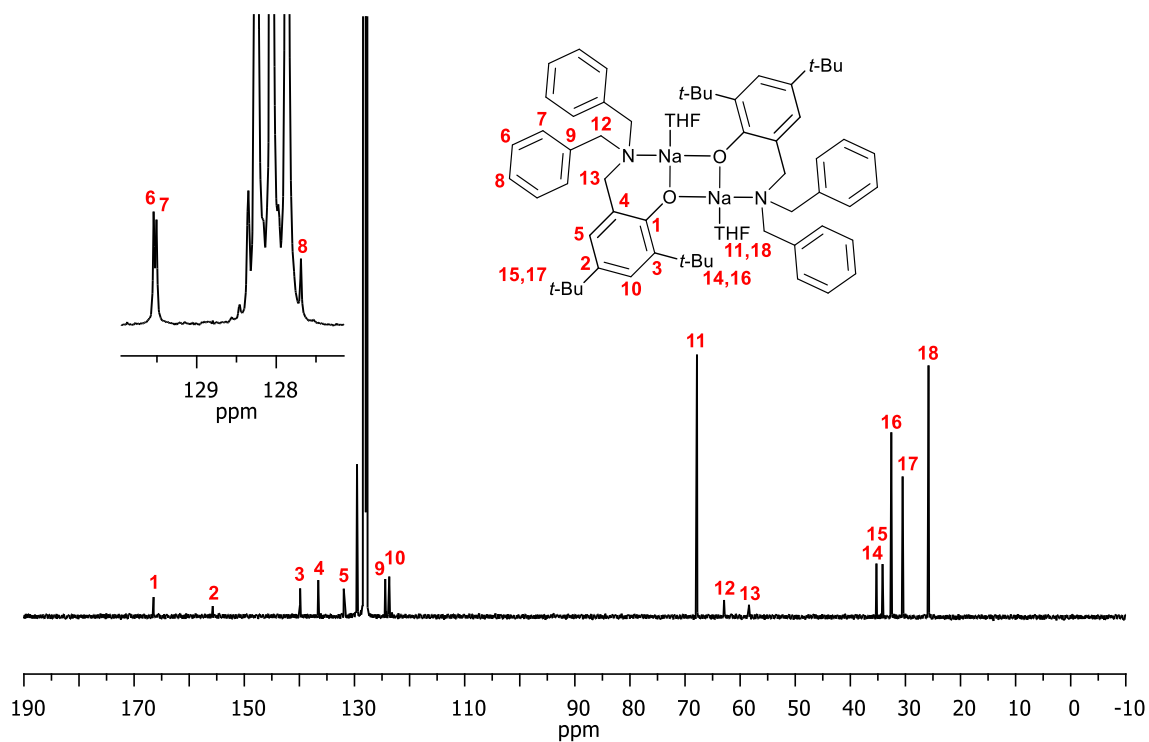

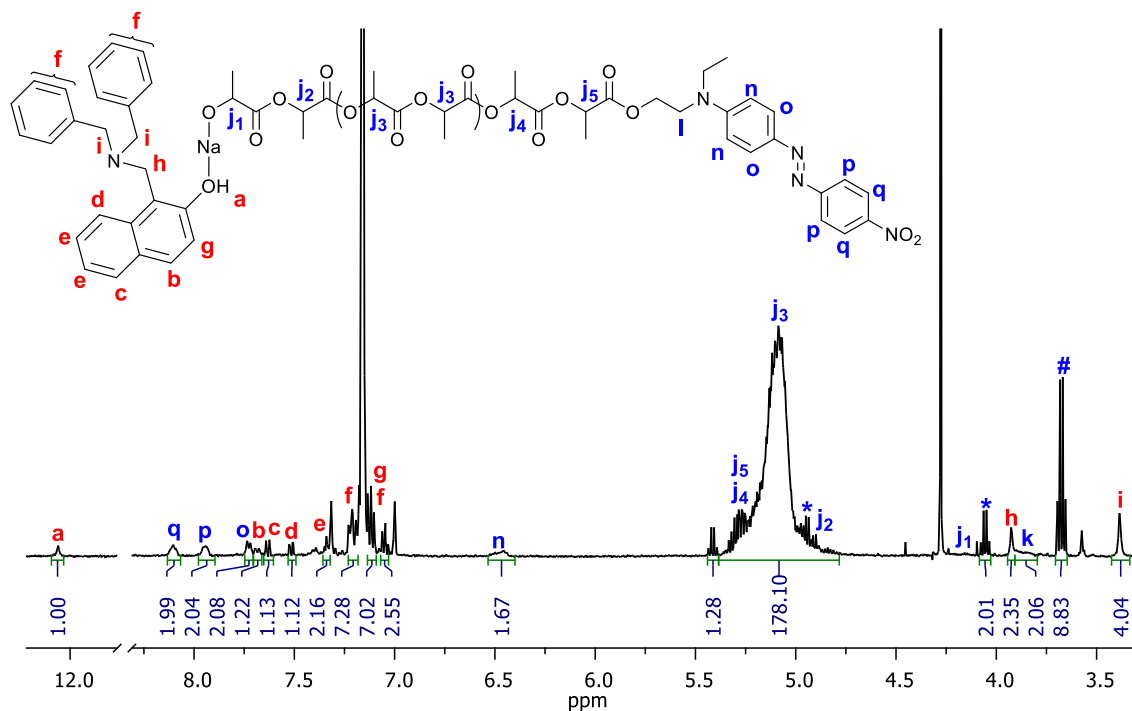

Figure S11. Fragment of  $^1\text{H}$  NMR spectrum for mixture of 0.25 eq.  $[(2\text{-npL}^{\text{Bn}})\text{-Na}]_4$  with 1.0 eq. PLA-100-D ( $\text{C}_6\text{D}_6$ ).

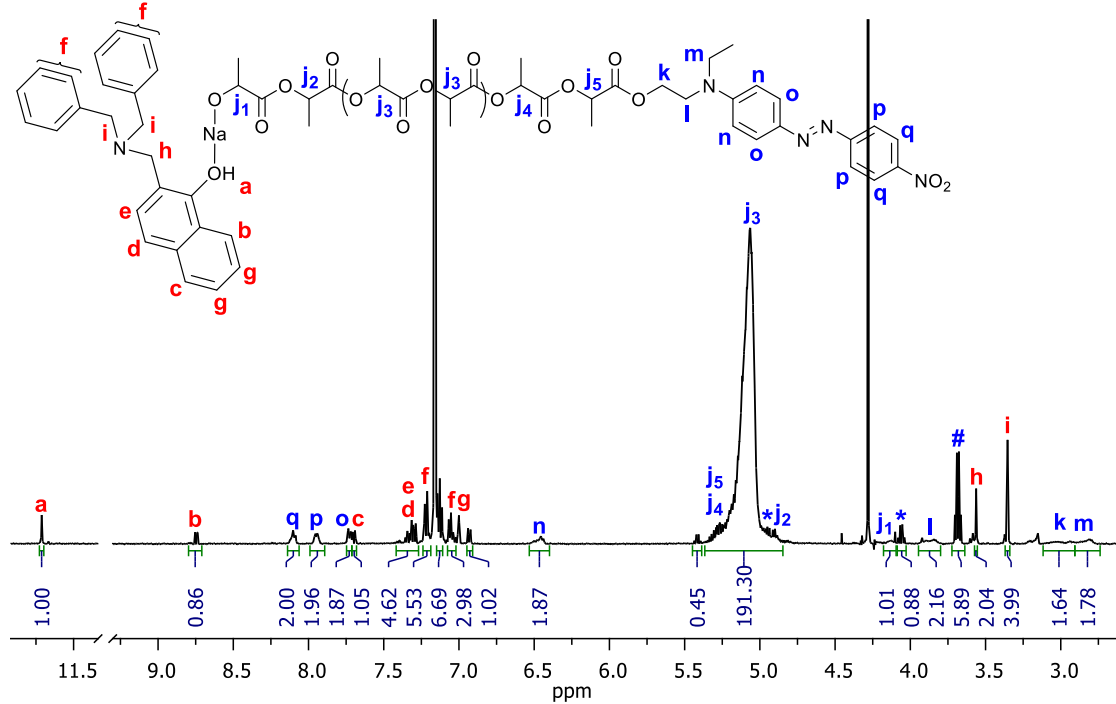

Figure S12. Fragment of  $^1\text{H}$  NMR spectrum for mixture of 0.25 eq.  $[(1\text{-npL}^{\text{Bn}})\text{-Na}(\text{THF})_{0.5}]_4$  with 1.0 eq. PLA-100-D ( $\text{C}_6\text{D}_6$ ).



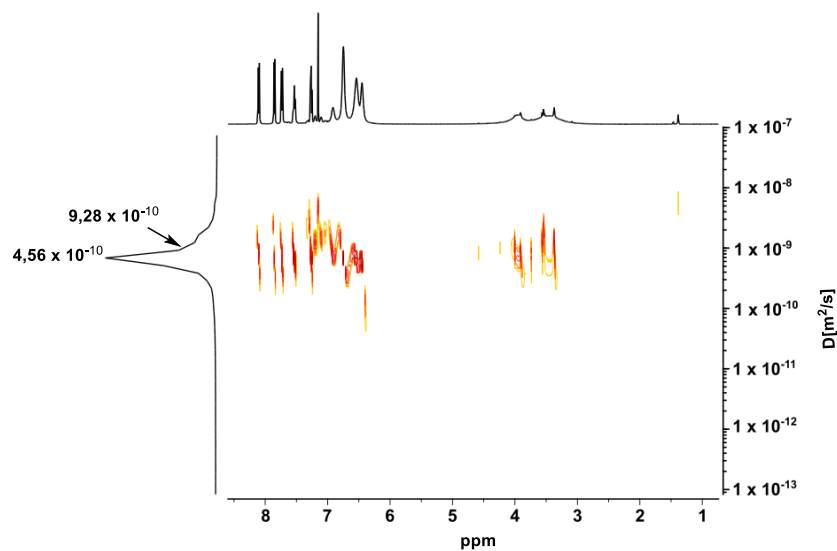

**Figure S13.** DOSY NMR spectrum of  $[(2\text{-npL}^{\text{Bn}})\text{Na}(\text{THF})_4]$  ( $\text{C}_6\text{D}_6$ ).

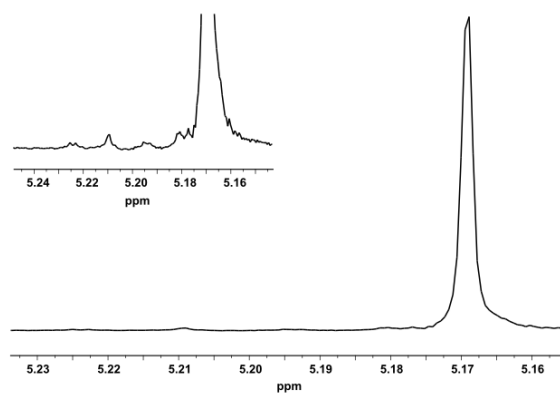

**Figure S14.** Deconvoluted homonuclear decoupled  $^1\text{H}$  NMR of the methine region of isotactic depolymerized PLA produced by  $[(2\text{-npL}^{\text{Bn}})\text{Na}]_4$  ( $\text{CDCl}_3$ ).

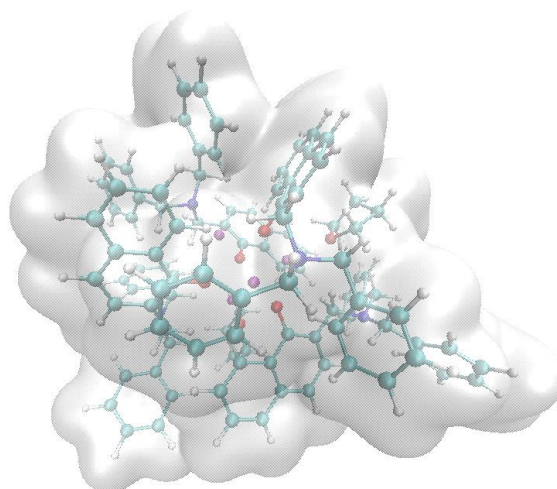

**Figure S15.** Van der Waals surface generated around DFT optimized  $[(1\text{-npL}^{\text{Bn}})\text{Na}(\text{THF})_{0.5}]_4$  structure.

|                                                                          | $[(2\text{-npL}^{\text{Bn}})\text{-Na(THF)}]_4$                                             | $[(1\text{-npL}^{\text{Bn}})\text{-Na(THF)}_{0.5}]_4$                                             |
|--------------------------------------------------------------------------|---------------------------------------------------------------------------------------------|---------------------------------------------------------------------------------------------------|
| Empirical formula                                                        | $\text{C}_{116}\text{H}_{120}\text{N}_4\text{O}_8\text{Na}_4, \text{C}_4\text{H}_8\text{O}$ | $2(\text{C}_{108}\text{H}_{104}\text{N}_4\text{O}_6\text{Na}_4), 3(\text{C}_4\text{H}_8\text{O})$ |
| Formula weight                                                           | 1862.22                                                                                     | 3508.12                                                                                           |
| Crystal system                                                           | Triclinic                                                                                   | Monoclinic                                                                                        |
| Space group                                                              | <i>P</i> -1                                                                                 | <i>Cc</i>                                                                                         |
| <i>a</i> (Å)                                                             | 14.765(5)                                                                                   | 12.952(2)                                                                                         |
| <i>b</i> (Å)                                                             | 15.491(5)                                                                                   | 23.117(5)                                                                                         |
| <i>c</i> (Å)                                                             | 25.112(8)                                                                                   | 64.350(13)                                                                                        |
| $\alpha$ (°)                                                             | 100.61(4)                                                                                   | 90                                                                                                |
| $\beta$ (°)                                                              | 98.40(4)                                                                                    | 94.38(2)                                                                                          |
| $\gamma$ (°)                                                             | 111.87(5)                                                                                   | 90                                                                                                |
| <i>V</i> (Å <sup>3</sup> )                                               | 5092(3)                                                                                     | 19211(6)                                                                                          |
| <i>Z</i>                                                                 | 2                                                                                           | 4                                                                                                 |
| Crystal description                                                      | Block, colourless                                                                           | Twinned block, colourless                                                                         |
| Crystal size (mm)                                                        | 0.52 × 0.24 × 0.14                                                                          | 0.42 × 0.31 × 0.16                                                                                |
| <i>d</i> <sub>calc</sub> (g/cm <sup>3</sup> )                            | 1.215                                                                                       | 1.213                                                                                             |
| $\mu$ (mm <sup>-1</sup> )                                                | 0.09                                                                                        | 0.744                                                                                             |
| <i>F</i> (000)                                                           | 1984                                                                                        | 7456                                                                                              |
| Diffractometer                                                           | Kuma KM-4 CCD                                                                               | Xcalibur, CCD Ruby                                                                                |
| $\lambda$ (Å)                                                            | 0.71073 (Mo)                                                                                | 1.54184 (Cu)                                                                                      |
| <i>T</i> (K)                                                             | 100                                                                                         | 100                                                                                               |
| $\theta$ min/max (°)                                                     | 2.8/25.0                                                                                    | 3.4/68.2                                                                                          |
| <i>h, k, l</i> min/max                                                   | -17/17, -18/14, -29/29                                                                      | -14/15, -27/27, -73/77                                                                            |
| Reflections collected                                                    | 48393                                                                                       | 46411                                                                                             |
| Independent reflections                                                  | 17919                                                                                       | 22743                                                                                             |
| Reflections [ <i>I</i> > 2 $\sigma$ ( <i>I</i> )]                        | 7257                                                                                        | 21781                                                                                             |
| <i>R</i> (int.)                                                          | 0.194                                                                                       | 0.064                                                                                             |
| data/restraints/params                                                   | 17919/676/1374                                                                              | 22743/1375/2610                                                                                   |
| <i>R</i> [ <i>F</i> <sup>2</sup> > 2 $\sigma$ ( <i>F</i> <sup>2</sup> )] | 0.096                                                                                       | 0.129                                                                                             |
| <i>wR</i> ( <i>F</i> <sup>2</sup> )                                      | 0.290                                                                                       | 0.364                                                                                             |
| Goof                                                                     | 1.04                                                                                        | 1.681                                                                                             |
| $\Delta\rho_{\text{max}}/\Delta\rho_{\text{min}}$ (e·Å <sup>-3</sup> )   | 0.41/-0.38                                                                                  | 0.74/-0.52                                                                                        |

**Table S1.** X-ray experimental data and refinement for  $[(2\text{-npL}^{\text{Bn}})\text{-Na(THF)}]_4$  and  $[(1\text{-npL}^{\text{Bn}})\text{-Na(THF)}_{0.5}]_4$ .

| Atoms / Distances (Å) |          |          |          |          |          |          |          |
|-----------------------|----------|----------|----------|----------|----------|----------|----------|
| Na1A-O1A              | 2.252(5) | Na1B-O1B | 2.243(5) | Na1C-O1C | 2.283(5) | Na1D-O1D | 2.305(5) |
| Na1A-O1B              | 2.304(4) | Na1B-O1A | 2.309(4) | Na1C-O1A | 2.388(6) | Na1D-O1B | 2.297(6) |
| Na1A-O1C              | 2.300(6) | Na1B-O1D | 2.401(6) | Na1C-O1D | 2.286(4) | Na1D-O1C | 2.311(4) |

|                        |          |                        |          |                      |          |                      |          |
|------------------------|----------|------------------------|----------|----------------------|----------|----------------------|----------|
| Na1A-O2A               | 2.315(5) | Na1B-O2B               | 2.308(6) | Na1C-O2C             | 2.276(6) | Na1D-O2D             | 2.303(6) |
| Na1A-Na1B <sup>a</sup> | 3.195(4) | Na1B-Na1D <sup>a</sup> | 3.329(4) | O1A-O1B <sup>a</sup> | 3.245(6) | O1B-O1C <sup>a</sup> | 3.411(7) |
| Na1A-Na1C <sup>a</sup> | 3.284(4) | Na1B-Na1C <sup>a</sup> | 3.237(4) | O1A-O1C <sup>a</sup> | 3.218(7) | O1B-O1D <sup>a</sup> | 3.190(7) |
| Na1A-Na1D <sup>a</sup> | 3.091(4) | Na1C-Na1D <sup>a</sup> | 3.130(4) | O1A-O1D <sup>a</sup> | 3.395(6) | O1C-O1D <sup>a</sup> | 3.361(6) |

**Atoms / Angles (°)**

|               |          |               |          |               |          |               |          |
|---------------|----------|---------------|----------|---------------|----------|---------------|----------|
| O1A-Na1A-O1B  | 90.8(2)  | O1B-Na1B-O1A  | 90.9(2)  | O1C-Na1C-O1A  | 87.1(2)  | O1D-Na1D-O1B  | 87.8(2)  |
| O1A-Na1A-O1C  | 90.0(2)  | O1B-Na1B-O1D  | 86.7(2)  | O1C-Na1C-O1D  | 94.7(2)  | O1D-Na1D-O1C  | 93.4(2)  |
| O1A-Na1A-O2A  | 146.5(2) | O1B-Na1B-O2B  | 121.6(2) | O1C-Na1C-O2C  | 122.5(2) | O1D-Na1D-O2D  | 156.1(2) |
| O1B-Na1A-O1C  | 95.6(2)  | O1A-Na1B-O1D  | 92.2(2)  | O1A-Na1C-O1D  | 93.1(2)  | O1B-Na1D-O1C  | 95.5(2)  |
| O1B-Na1A-O2A  | 115.1(2) | O1A-Na1B-O2B  | 101.2(2) | O1A-Na1C-O2C  | 143.8(2) | O1B-Na1D-O2D  | 104.9(2) |
| O1C-Na1A-O2A  | 107.0(2) | O1D-Na1B-O2B  | 148.0(2) | O1D-Na1C-O2C  | 103.5(2) | O1C-Na1D-O2D  | 105.2(2) |
| Na1A-O1A-Na1B | 88.9(2)  | Na1A-O1C-Na1C | 91.5(2)  | Na1B-O1A-Na1C | 87.1(2)  | Na1B-O1D-Na1D | 90.0(2)  |
| Na1A-O1B-Na1B | 89.3(2)  | Na1A-O1B-Na1D | 84.4(2)  | Na1B-O1D-Na1C | 87.3(2)  | Na1C-O1C-Na1D | 85.9(2)  |
| Na1A-O1A-Na1C | 90.1(2)  | Na1A-O1C-Na1D | 84.2(2)  | Na1B-O1B-Na1D | 94.3(2)  | Na1C-O1D-Na1D | 86.0(2)  |

<sup>a</sup> Non-bonding interactions

**Table S2.** Selected bond distances (Å) and angles (°) for [(<sub>2-np</sub>L<sup>Bn</sup>)-Na(THF)]<sub>4</sub>.

| Atoms / Distances (Å)  |          |                        |          |                      |          |                      |          |
|------------------------|----------|------------------------|----------|----------------------|----------|----------------------|----------|
| Na1A-O1A               | 2.277(8) | Na1B-O1B               | 2.259(8) | Na1C-O1C             | 2.340(7) | Na1D-O1D             | 2.269(8) |
| Na1A-O1B               | 2.258(8) | Na1B-O1C               | 2.331(8) | Na1C-O1A             | 2.220(8) | Na1D-O1A             | 2.503(8) |
| Na1A-O1C               | 2.295(8) | Na1B-O1D               | 2.409(7) | Na1C-O1D             | 2.331(8) | Na1D-O1B             | 2.383(7) |
| Na1A-N1A               | 2.40(1)  | Na1B-N1B               | 2.51(1)  | Na1C-O2C             | 2.256(9) | Na1D-O2D             | 2.377(9) |
| Na1A-Na1B <sup>a</sup> | 3.189(5) | Na1B-Na1C <sup>a</sup> | 3.251(6) | O1A-O1B <sup>a</sup> | 3.33(1)  | O1B-O1C <sup>a</sup> | 3.27(1)  |
| Na1A-Na1C <sup>a</sup> | 3.097(6) | Na1B-Na1D <sup>a</sup> | 3.274(5) | O1A-O1C <sup>a</sup> | 3.35(1)  | O1B-O1D <sup>a</sup> | 3.315(9) |
| Na1A-Na1D <sup>a</sup> | 3.329(5) | Na1C-Na1D <sup>a</sup> | 3.291(6) | O1A-O1D <sup>a</sup> | 3.30(1)  | O1C-O1D <sup>a</sup> | 3.399(9) |
| Na1E-O1E               | 2.271(8) | Na1F-O1F               | 2.284(8) | Na1G-O1G             | 2.342(8) | Na1H-O1H             | 2.266(8) |
| Na1E-O1F               | 2.266(7) | Na1F-O1G               | 2.334(8) | Na1G-O1E             | 2.197(8) | Na1H-O1E             | 2.493(8) |
| Na1E-O1G               | 2.289(8) | Na1F-O1H               | 2.399(8) | Na1G-O1H             | 2.335(8) | Na1H-O1F             | 2.365(8) |
| Na1E-N1E               | 2.37(1)  | Na1F-N1F               | 2.487(9) | Na1G-O2G             | 2.238(8) | Na1H-O2H             | 2.323(9) |
| Na1E-Na1F <sup>a</sup> | 3.172(5) | Na1F-Na1G <sup>a</sup> | 3.247(5) | O1E-O1F <sup>a</sup> | 3.343(9) | O1F-O1G <sup>a</sup> | 3.31(1)  |
| Na1E-Na1G <sup>a</sup> | 3.131(5) | Na1F-Na1H <sup>a</sup> | 3.240(6) | O1E-O1G <sup>a</sup> | 3.30(1)  | O1F-O1H <sup>a</sup> | 3.35(1)  |
| Na1E-Na1H <sup>a</sup> | 3.295(5) | Na1G-Na1H <sup>a</sup> | 3.271(5) | O1E-O1H <sup>a</sup> | 3.300(9) | O1G-O1H <sup>a</sup> | 3.40(1)  |
| Atoms / Angles (°)     |          |                        |          |                      |          |                      |          |
| O1A-Na1A-O1B           | 94.4(3)  | O1B-Na1B-O1C           | 91.0(3)  | O1C-Na1C-O1A         | 94.7(3)  | O1D-Na1D-O1A         | 87.4(3)  |
| O1A-Na1A-O1C           | 94.4(3)  | O1B-Na1B-O1D           | 90.4(3)  | O1C-Na1C-O1D         | 93.4(3)  | O1D-Na1D-O1B         | 90.9(3)  |
| O1A-Na1A-N1A           | 93.4(3)  | O1B-Na1B-N1B           | 86.2(3)  | O1C-Na1C-O2C         | 139.5(3) | O1D-Na1D-O2D         | 121.5(3) |
| O1B-Na1A-O1C           | 91.9(3)  | O1C-Na1B-O1D           | 91.6(3)  | O1A-Na1C-O1D         | 93.0(3)  | O1A-Na1D-O1B         | 85.8(3)  |
| O1B-Na1A-N1A           | 135.0(3) | O1C-Na1B-N1B           | 146.5(3) | O1A-Na1C-O2C         | 102.5(3) | O1A-Na1D-O2D         | 146.4(3) |
| O1C-Na1A-N1A           | 131.5(3) | O1D-Na1B-N1B           | 121.8(3) | O1D-Na1C-O2C         | 121.5(3) | O1B-Na1D-O2D         | 108.6(3) |
| Na1A-O1A-Na1C          | 87.0(3)  | Na1A-O1B-Na1D          | 91.6(3)  | Na1B-O1B-Na1D        | 89.7(3)  | Na1B-O1D-Na1D        | 88.8(3)  |

|               |          |               |          |               |          |               |          |
|---------------|----------|---------------|----------|---------------|----------|---------------|----------|
| Na1A-O1A-Na1D | 88.1(3)  | Na1A-O1C-Na1B | 87.1(3)  | Na1B-O1C-Na1C | 88.2(3)  | Na1C-O1A-Na1D | 88.2(3)  |
| Na1A-O1B-Na1B | 89.8(3)  | Na1A-O1C-Na1C | 83.8(3)  | Na1B-O1D-Na1C | 86.6(3)  | Na1C-O1D-Na1D | 91.4(3)  |
| O1E-Na1E-O1F  | 94.9(3)  | O1F-Na1F-O1G  | 91.6(3)  | O1G-Na1G-O1E  | 93.1(3)  | O1H-Na1H-O1E  | 87.6(3)  |
| O1E-Na1E-O1G  | 92.6(3)  | O1F-Na1F-O1H  | 91.2(3)  | O1G-Na1G-O1H  | 93.4(3)  | O1H-Na1H-O1F  | 92.5(3)  |
| O1E-Na1E-N1E  | 94.1(3)  | O1F-Na1F-N1F  | 85.6(3)  | O1G-Na1G-O2G  | 142.8(3) | O1H-Na1H-O2H  | 123.9(3) |
| O1F-Na1E-O1G  | 93.2(3)  | O1G-Na1F-O1F  | 91.6(3)  | O1E-Na1G-O1H  | 93.4(3)  | O1E-Na1H-O1F  | 86.9(3)  |
| O1F-Na1E-N1E  | 134.5(3) | O1G-Na1F-N1H  | 91.9(3)  | O1E-Na1G-O2G  | 104.3(3) | O1E-Na1H-O1H  | 87.6(3)  |
| O1G-Na1E-N1E  | 130.8(3) | O1H-Na1F-N1F  | 121.1(3) | O1H-Na1G-O2G  | 117.6(3) | O1F-Na1H-O2H  | 143.6(3) |
| Na1E-O1E-Na1G | 89.0(3)  | Na1E-O1F-Na1H | 90.7(3)  | Na1F-O1F-Na1H | 88.3(3)  | Na1F-O1H-Na1H | 87.9(3)  |
| Na1E-O1E-Na1H | 87.4(3)  | Na1E-O1G-Na1F | 86.6(3)  | Na1F-O1G-Na1G | 88.0(3)  | Na1G-O1E-Na1H | 88.2(3)  |
| Na1E-O1F-Na1F | 88.4(3)  | Na1E-O1G-Na1G | 85.1(3)  | Na1F-O1H-Na1G | 86.6(3)  | Na1G-O1H-Na1H | 90.6(3)  |

<sup>a</sup> Non-bonding interactions

**Table S3.** Selected bond distances (Å) and angles (°) for  $[(1\text{-npL}^{\text{Bn}})\text{-Na}(\text{THF})_{0.5}]_4$ .

|                                                         | $E_{\text{tot}}$ | $E_{\text{tot}}$ with ZPE correction | H        | G        | $S^{\text{a}}$ |
|---------------------------------------------------------|------------------|--------------------------------------|----------|----------|----------------|
| $[(d\text{-tbL}^{\text{Bn}})\text{Na}(\text{THF})]_2$   | -2072953         | -2072065                             | -2072016 | -2072139 | 0.414          |
| INT1                                                    | -2072938         | -2072052                             | -2072002 | -2072131 | 0.433          |
| INT2                                                    | -2364721         | -2363681                             | -2363625 | -2363763 | 0.466          |
| $[(d\text{-tbL}^{\text{Bn}})\text{Na}(\text{THF})_2]_2$ | -2364724         | -2363687                             | -2363630 | -2363773 | 0.483          |
| THF                                                     | -145869          | -145795                              | -145791  | -145813  | 0.072          |

<sup>a</sup> data are given in kcal/mol\*K

**Table S4.** Energies of calculated models for transformation pathways from “closed”  $[(d\text{-tbL}^{\text{Bn}})\text{Na}(\text{THF})]_2$  to “opened”  $[(d\text{-tbL}^{\text{Bn}})\text{Na}(\text{THF})_2]_2$  structures. Data are given in kcal/mol.

|                                                       |                  | $E_{\text{tot}}$ | $E_{\text{tot}}$ with ZPE correction | H        | G        | $S^{\text{a}}$ |
|-------------------------------------------------------|------------------|------------------|--------------------------------------|----------|----------|----------------|
| $[(d\text{-tbL}^{\text{Bn}})\text{Na}(\text{THF})]_2$ | Gas phase        | -2072953         | -2072065                             | -2072016 | -2072139 | 0.414          |
|                                                       | PCM              | -2072962         | -2072074                             | -2072025 | -2072147 | 0.409          |
| CH <sub>3</sub> OH                                    | Gas phase        | -72613           | -72580                               | -72578   | -72595   | 0.057          |
|                                                       | PCM              | -72615           | -72583                               | -72580   | -72597   | 0.057          |
| INT1                                                  | Gas phase        | -2218218         | -2217262                             | -2217208 | -2217342 | 0.449          |
|                                                       | PCM              | -2218227         | -2217272                             | -2217218 | -2217353 | 0.454          |
| 2                                                     | Gas phase        | -2218211         | -2217256                             | -2217201 | -2217339 | 0.463          |
|                                                       | PCM              | -2218223         | -2217268                             | -2217214 | -2217349 | 0.455          |
| INT2                                                  | Gas phase        | -2218150         | -2217196                             | -2217141 | -2217277 | 0.455          |
|                                                       | PCM <sup>b</sup> | -2218167         | -2217207                             | -2217152 | -2217287 | 0.452          |
| 3                                                     | Gas phase        | -2218182         | -2217227                             | -2217173 | -2217308 | 0.453          |
|                                                       | PCM              | -2218192         | -2217237                             | -2217183 | -2217316 | 0.446          |

<sup>a</sup> data are given in kcal/mol\*K

<sup>b</sup> The total energy was calculated without optimization for the geometry taken from the gas phase calculations. Corrections to the energies have been estimated.

**Table S5.** Energies of calculated models for proposed mechanism of the reaction between  $[(d\text{-tbL}^{\text{Bn}})\text{Na}(\text{THF})]_2$  and methanol in gas phase and in Polarizable Continuum Model with dichloromethane as a solvent. Data are given in kcal/mol.

|                                                       | $E_{\text{tot}}$ | $E_{\text{tot}}$ with ZPE correction | H        | G        | $S^a$ |
|-------------------------------------------------------|------------------|--------------------------------------|----------|----------|-------|
| $[(d\text{-tbL}^{\text{Bn}})\text{Na}(\text{THF})]_2$ | -2072953         | -2072065                             | -2072016 | -2072139 | 0.414 |
| LA                                                    | -240288          | -240210                              | -240204  | -240231  | 0.089 |
| A                                                     | -2553561         | -2552515                             | -2552454 | -2552602 | 0.495 |
| B                                                     | -2553560         | -2552512                             | -2552452 | -2552598 | 0.491 |
| C                                                     | -1276749         | -1276227                             | -1276196 | -1276280 | 0.280 |
| D                                                     | -2553585         | -2552539                             | -2552478 | -2552628 | 0.504 |

<sup>a</sup> data are given in kcal/mol\*K

**Table S6.** Energies of calculated models for proposed compounds obtained between  $[(d\text{-tbL}^{\text{Bn}})\text{Na}(\text{THF})]_2$  and methyl lactate.

Data are given in kcal/mol.

|                                                       | $E_{\text{tot}}$ | $E_{\text{tot}}$ with ZPE correction | H        | G        | $S^a$ |
|-------------------------------------------------------|------------------|--------------------------------------|----------|----------|-------|
| $[(d\text{-tbL}^{\text{Bn}})\text{Na}(\text{THF})]_2$ | -2072953         | -2072065                             | -2072016 | -2072139 | 0.414 |
| LLA                                                   | -407954          | -407832                              | -407822  | -407858  | 0.119 |
| $\text{CH}_3\text{OH}$                                | -72613           | -72580                               | -72578   | -72595   | 0.057 |
| 1                                                     | -2888937         | -2887801                             | -2887733 | -2887898 | 0.553 |
| 2                                                     | -3034191         | -3032987                             | -3032914 | -3033090 | 0.591 |
| 3                                                     | -3034183         | -3032978                             | -3032905 | -3033081 | 0.592 |
| 4                                                     | -3179440         | -3178168                             | -3178089 | -3178280 | 0.639 |
| 5                                                     | -2553585         | -2552539                             | -2552478 | -2552628 | 0.504 |
| La-Me                                                 | -312907          | -312795                              | -312787  | -312820  | 0.110 |

<sup>a</sup> data are given in kcal/mol\*K

**Table S7.** Energies of calculated models for proposed polylactide degradation process by using sodium compounds. Data are given in kcal/mol.

| $[(d\text{-tbL}^{\text{Bn}})\text{Na}(\text{THF})]_2$ |            |            |             | INT1 |             |             |             |
|-------------------------------------------------------|------------|------------|-------------|------|-------------|-------------|-------------|
| Na                                                    | 0.25021400 | 0.54848300 | -1.45718900 | Na   | 9.71050000  | 10.54635100 | 10.14632900 |
| O                                                     | 1.87645800 | 1.97225700 | -2.23565700 | O    | 10.85229900 | 9.26329800  | 8.70643700  |
| C                                                     | 3.29189500 | 1.67662100 | -2.31973200 | O    | 11.31493000 | 11.72184400 | 11.27183300 |
| H                                                     | 3.47785200 | 0.74187200 | -1.78905600 | N    | 13.15455000 | 12.05437800 | 6.87970500  |
| H                                                     | 3.56419700 | 1.55398800 | -3.37798800 | C    | 12.15043200 | 9.18457100  | 8.93154300  |
| C                                                     | 3.98600900 | 2.88152300 | -1.69323400 | C    | 12.76128900 | 8.00904400  | 9.47769300  |
| H                                                     | 5.01979700 | 2.99521800 | -2.03275600 | C    | 14.13660900 | 8.02403900  | 9.74682400  |
| H                                                     | 3.99147200 | 2.77104200 | -0.60389600 | H    | 14.58286000 | 7.13604800  | 10.17268900 |
| C                                                     | 3.06643400 | 4.03286400 | -2.12894300 | C    | 14.96798500 | 9.12306500  | 9.48984300  |

|    |             |             |             |   |             |             |             |
|----|-------------|-------------|-------------|---|-------------|-------------|-------------|
| H  | 3.28255200  | 4.32273400  | -3.16426000 | C | 14.35843500 | 10.24838000 | 8.92529900  |
| H  | 3.15614900  | 4.92440500  | -1.50111900 | H | 14.96658600 | 11.11586300 | 8.68182100  |
| C  | 1.67706000  | 3.39224600  | -2.03343800 | C | 12.99438300 | 10.30235700 | 8.65248900  |
| H  | 0.97035100  | 3.75101100  | -2.78685300 | C | 11.91471700 | 6.74676900  | 9.74075100  |
| H  | 1.23430900  | 3.53789100  | -1.03816400 | C | 12.73710600 | 5.59765100  | 10.35727500 |
| Na | -0.18150900 | -0.38231700 | 1.48053600  | H | 13.55942900 | 5.28462900  | 9.70404000  |
| O  | -1.41926800 | 0.84968800  | -0.03083600 | H | 12.08997100 | 4.72621100  | 10.51249300 |
| O  | -1.78677300 | -1.95418000 | 1.95344200  | H | 13.15978400 | 5.87425500  | 11.33050300 |
| N  | -1.26420000 | -1.02990900 | -2.74083200 | C | 11.32812700 | 6.23332800  | 8.40350900  |
| C  | -2.67939300 | 0.60064500  | -0.31726400 | H | 10.73515100 | 7.01327500  | 7.92185500  |
| C  | -3.74857700 | 1.51071500  | -0.00712600 | H | 10.68869700 | 5.35603400  | 8.57245100  |
| C  | -5.07032700 | 1.09891200  | -0.22213900 | H | 12.13358400 | 5.93992300  | 7.71946600  |
| H  | -5.86264000 | 1.78318400  | 0.04691900  | C | 10.75779100 | 7.05797100  | 10.72014700 |
| C  | -5.43026000 | -0.13997700 | -0.76825300 | H | 11.14624500 | 7.48717200  | 11.65256000 |
| C  | -4.37552900 | -0.96669300 | -1.16575500 | H | 10.20703400 | 6.14162200  | 10.97252100 |
| H  | -4.58992600 | -1.91788800 | -1.65126200 | H | 10.06043200 | 7.76816200  | 10.27500600 |
| C  | -3.03738200 | -0.61898700 | -0.97950500 | C | 16.47458600 | 9.13687200  | 9.79434600  |
| C  | -3.45184100 | 2.91821200  | 0.55172200  | C | 16.78543100 | 10.26200500 | 10.80964200 |
| C  | -4.72055600 | 3.77599400  | 0.72545100  | H | 16.49505400 | 11.24439600 | 10.42192200 |
| H  | -5.25553500 | 3.91443600  | -0.22139400 | H | 17.85835200 | 10.29697400 | 11.03918200 |
| H  | -4.43888800 | 4.76860100  | 1.09639800  | H | 16.23995600 | 10.09769700 | 11.74678200 |
| H  | -5.41575800 | 3.34082200  | 1.45275800  | C | 17.26984000 | 9.39860500  | 8.49327100  |
| C  | -2.50853000 | 3.68245900  | -0.40778700 | H | 17.06241400 | 8.61822000  | 7.75175800  |
| H  | -1.58208900 | 3.12565300  | -0.56196000 | H | 18.34946400 | 9.40403400  | 8.69208900  |
| H  | -2.26091100 | 4.66853600  | 0.00738700  | H | 17.01105800 | 10.36326400 | 8.04444700  |
| H  | -2.99352300 | 3.83929900  | -1.37843300 | C | 16.96578100 | 7.80621900  | 10.39355600 |
| C  | -2.77610000 | 2.79368900  | 1.92919300  | H | 16.46127900 | 7.57713800  | 11.33937900 |
| H  | -3.43152500 | 2.28420400  | 2.64440800  | H | 18.04189800 | 7.86203000  | 10.59560700 |
| H  | -2.52825500 | 3.78083200  | 2.34215900  | H | 16.79889300 | 6.96842700  | 9.70691000  |
| H  | -1.85901600 | 2.21750300  | 1.82563600  | C | 12.40426200 | 11.56474000 | 8.05204200  |
| C  | -6.88628700 | -0.58933600 | -0.96587800 | H | 11.36765700 | 11.37163600 | 7.76787900  |
| C  | -7.13091300 | -1.90201300 | -0.18512500 | H | 12.34987700 | 12.35791000 | 8.81258600  |
| H  | -6.46734200 | -2.70401800 | -0.52646900 | C | 13.94820200 | 13.25312300 | 7.11487400  |
| H  | -8.16503100 | -2.24659600 | -0.31462000 | H | 14.30084900 | 13.21541300 | 8.15272400  |
| H  | -6.95078600 | -1.75381300 | 0.88619300  | H | 13.34605600 | 14.18110700 | 7.03359800  |
| C  | -7.15805100 | -0.83460400 | -2.46862400 | C | 15.15782100 | 13.34933300 | 6.20127100  |
| H  | -6.99480600 | 0.08335400  | -3.04475200 | C | 15.89299100 | 12.19929100 | 5.88192900  |
| H  | -8.19352200 | -1.16171600 | -2.62930000 | H | 15.54473300 | 11.23919800 | 6.24918700  |
| H  | -6.49754300 | -1.60665400 | -2.87789200 | C | 17.04056300 | 12.28802500 | 5.09475900  |
| C  | -7.89747400 | 0.45765600  | -0.46324600 | H | 17.60123000 | 11.38741600 | 4.85743500  |
| H  | -7.76889000 | 0.66322900  | 0.60573000  | C | 17.46812900 | 13.52761500 | 4.61088300  |
| H  | -8.91960000 | 0.09015900  | -0.61169600 | H | 18.36106400 | 13.59626000 | 3.99502800  |
| H  | -7.80334600 | 1.40478400  | -1.00643300 | C | 16.73656100 | 14.67614500 | 4.91672600  |
| C  | -1.97207100 | -1.53790500 | -1.52033500 | H | 17.05534800 | 15.64345300 | 4.53664800  |
| H  | -1.19103700 | -1.71747500 | -0.77296400 | C | 15.58686500 | 14.58419200 | 5.70487500  |
| C  | -2.18947300 | -0.54234300 | -3.80433000 | H | 15.01602800 | 15.48150200 | 5.93596200  |
| H  | -3.18692900 | -0.44757500 | -3.37078200 | C | 12.36605900 | 12.14108100 | 5.65881700  |
| H  | -2.25981800 | -1.27868700 | -4.61632700 | H | 13.02277200 | 12.53910600 | 4.87325900  |
| C  | -1.77671000 | 0.80819000  | -4.35513300 | H | 11.52746300 | 12.85856400 | 5.75579300  |
| C  | -1.91382800 | 1.94686500  | -3.54769500 | C | 11.82137800 | 10.80113200 | 5.19937200  |
| H  | -2.35544200 | 1.84566300  | -2.56105000 | C | 12.51652900 | 9.60953900  | 5.45084200  |
| C  | -1.50511500 | 3.19930500  | -4.00608400 | H | 13.43405100 | 9.64904400  | 6.02653900  |
| H  | -1.62391200 | 4.07022000  | -3.36643000 | C | 12.01073000 | 8.38554600  | 5.00958400  |
| C  | -0.96099400 | 3.33311800  | -5.28723500 | H | 12.55223100 | 7.47069600  | 5.23382200  |
| H  | -0.64512700 | 4.30856200  | -5.64884700 | C | 10.81017400 | 8.33241700  | 4.29482500  |
| C  | -0.84029300 | 2.20779100  | -6.10480200 | H | 10.42031700 | 7.37868100  | 3.94839500  |
| H  | -0.42225000 | 2.30119400  | -7.10386900 | C | 10.11151000 | 9.51503700  | 4.03375700  |
| C  | -1.24710300 | 0.95482300  | -5.64075700 | H | 9.17021100  | 9.48520700  | 3.49255900  |

|   |             |             |             |    |             |             |             |
|---|-------------|-------------|-------------|----|-------------|-------------|-------------|
| H | -1.12368100 | 0.07889000  | -6.27212700 | C  | 10.61015700 | 10.73891300 | 4.49284300  |
| C | -3.15388800 | -1.66312700 | 2.33202700  | H  | 10.05126100 | 11.65356100 | 4.30700000  |
| H | -3.47392500 | -0.76309300 | 1.80208900  | C  | 12.46468700 | 11.12469200 | 11.90970700 |
| H | -3.18063600 | -1.48342000 | 3.41513600  | H  | 12.71996100 | 10.21935300 | 11.35641200 |
| C | -3.95326100 | -2.90812600 | 1.95512900  | H  | 12.20957300 | 10.86408200 | 12.94848800 |
| H | -4.86289600 | -3.01965600 | 2.55271500  | C  | 13.53184500 | 12.21036900 | 11.85184100 |
| H | -4.23777300 | -2.85470200 | 0.89955100  | H  | 14.33475600 | 12.05816100 | 12.57876400 |
| C | -2.92245700 | -4.02315000 | 2.18687400  | H  | 13.97289600 | 12.22435600 | 10.85024600 |
| H | -2.83854600 | -4.25232600 | 3.25624800  | C  | 12.70107800 | 13.47782400 | 12.11391200 |
| H | -3.15406100 | -4.95023100 | 1.65382000  | H  | 12.55488400 | 13.61927500 | 13.19109100 |
| C | -1.63571200 | -3.36676000 | 1.68449000  | H  | 13.16194500 | 14.38685200 | 11.71661300 |
| H | -0.73357000 | -3.71372300 | 2.19279300  | C  | 11.36138600 | 13.15736400 | 11.42613500 |
| H | -1.51326000 | -3.50641300 | 0.60234300  | H  | 10.49229700 | 13.48204200 | 12.01023500 |
| H | -2.42989200 | -2.51939800 | -1.74209600 | H  | 11.28773300 | 13.60092600 | 10.42706900 |
| C | -0.38900800 | -2.10890000 | -3.24512700 | Na | 9.39623300  | 9.60060400  | 7.12542000  |
| H | 0.28680000  | -2.38859000 | -2.42794500 | O  | 8.34264100  | 10.99295300 | 8.50923000  |
| H | -0.99082700 | -3.00987100 | -3.47043000 | O  | 7.57695400  | 8.88214500  | 5.88954200  |
| C | 0.41478500  | -1.75345000 | -4.48061100 | N  | 5.68302400  | 8.42710500  | 10.22964200 |
| C | 1.26859900  | -0.64281700 | -4.52322900 | C  | 7.06759200  | 11.30759400 | 8.38261200  |
| H | 1.34676000  | 0.02638400  | -3.67528600 | C  | 6.63778700  | 12.60788200 | 7.96307200  |
| C | 2.00421100  | -0.34692600 | -5.66805500 | C  | 5.26512600  | 12.84733200 | 7.80784700  |
| H | 2.65089600  | 0.52655800  | -5.67660700 | H  | 4.95232300  | 13.82854200 | 7.47860100  |
| C | 1.89772400  | -1.15456000 | -6.80273100 | C  | 4.27498100  | 11.88775700 | 8.05748500  |
| H | 2.46855300  | -0.92120100 | -7.69756800 | C  | 4.71485800  | 10.63147200 | 8.48927700  |
| C | 1.04737300  | -2.26014100 | -6.77876700 | H  | 3.98176500  | 9.86322600  | 8.71932000  |
| H | 0.94984500  | -2.89472500 | -7.65574100 | C  | 6.06357000  | 10.32781300 | 8.64824300  |
| C | 0.31448500  | -2.55265400 | -5.62556100 | C  | 7.67427500  | 13.71449000 | 7.67824300  |
| H | -0.35022600 | -3.41359200 | -5.61652300 | C  | 7.02188300  | 15.04046400 | 7.23934200  |
| O | 1.51259400  | -0.57252000 | 0.03202500  | H  | 6.34969700  | 15.43995500 | 8.00737300  |
| N | 1.32615300  | 1.09157500  | 2.87436600  | H  | 7.80132200  | 15.79034500 | 7.05909500  |
| C | 2.76996900  | -0.44745000 | 0.39609300  | H  | 6.45100600  | 14.92791000 | 6.31027800  |
| C | 3.78982300  | -1.39733800 | 0.04234800  | C  | 8.50171800  | 14.00659700 | 8.95313500  |
| C | 5.11807500  | -1.12978800 | 0.39830400  | H  | 9.02623000  | 13.10798000 | 9.27990100  |
| H | 5.87282200  | -1.84622500 | 0.10588700  | H  | 9.24361800  | 14.79362300 | 8.75998300  |
| C | 5.53064800  | 0.00798600  | 1.10311500  | H  | 7.84956700  | 14.34568700 | 9.76718900  |
| C | 4.51876700  | 0.88561900  | 1.50104000  | C  | 8.63020100  | 13.27372700 | 6.54398800  |
| H | 4.77119100  | 1.76883800  | 2.08622700  | H  | 8.06688500  | 13.04167400 | 5.63108700  |
| C | 3.17502300  | 0.67329100  | 1.19033600  | H  | 9.34460100  | 14.07341400 | 6.30667200  |
| C | 3.44586200  | -2.65860300 | -0.77509400 | H  | 9.19188100  | 12.38808900 | 6.84209800  |
| C | 4.62853700  | -3.64040200 | -0.89591900 | C  | 2.77183000  | 12.15166500 | 7.87425100  |
| H | 4.98505000  | -3.97107200 | 0.08689300  | C  | 2.20813900  | 11.18932400 | 6.80194300  |
| H | 4.30664000  | -4.52886300 | -1.45197200 | H  | 2.35177100  | 10.14163500 | 7.08778300  |
| H | 5.47536100  | -3.20737800 | -1.44016300 | H  | 1.13226300  | 11.35186400 | 6.65633200  |
| C | 2.27559200  | -3.43837300 | -0.13026700 | H  | 2.71158500  | 11.34577700 | 5.84031600  |
| H | 1.39544500  | -2.80324300 | -0.02793400 | C  | 2.02952200  | 11.90880000 | 9.20978300  |
| H | 2.01945000  | -4.31244800 | -0.74365400 | H  | 2.41631100  | 12.57273600 | 9.99174900  |
| H | 2.56124500  | -3.80050100 | 0.86447500  | H  | 0.95469600  | 12.10163500 | 9.09732100  |
| C | 3.05364600  | -2.21477900 | -2.19768600 | H  | 2.14551500  | 10.87744200 | 9.55886300  |
| H | 3.90195900  | -1.74392300 | -2.70835100 | C  | 2.47862300  | 13.59390900 | 7.42169300  |
| H | 2.71891800  | -3.06180300 | -2.81026800 | H  | 2.94904700  | 13.81976100 | 6.45772900  |
| H | 2.24482400  | -1.48852800 | -2.14844500 | H  | 1.39785600  | 13.73663100 | 7.30545300  |
| C | 6.99766200  | 0.30902700  | 1.44575400  | H  | 2.83472900  | 14.32693700 | 8.15461200  |
| C | 7.40759100  | 1.65381000  | 0.80025500  | C  | 6.48078200  | 8.94179000  | 9.10262200  |
| H | 6.78374400  | 2.47949500  | 1.15941800  | H  | 7.53303300  | 8.97483400  | 9.39419600  |
| H | 8.45230400  | 1.89696400  | 1.03353900  | H  | 6.43812900  | 8.23410800  | 8.25946700  |
| H | 7.30195100  | 1.60626200  | -0.29010500 | C  | 4.69857000  | 7.41605800  | 9.86652000  |
| C | 7.16786100  | 0.40845900  | 2.97976200  | H  | 4.33265000  | 7.66060100  | 8.86195900  |
| H | 6.88713700  | -0.53540200 | 3.46112200  | H  | 5.14534100  | 6.40388500  | 9.78703900  |

|   |             |             |             |   |             |             |             |
|---|-------------|-------------|-------------|---|-------------|-------------|-------------|
| H | 8.21012900  | 0.63116100  | 3.24239900  | C | 3.51170100  | 7.37599500  | 10.81338500 |
| H | 6.54118200  | 1.19933200  | 3.40588500  | C | 2.99456300  | 8.56327200  | 11.34977700 |
| C | 7.95699200  | -0.77944200 | 0.92991900  | H | 3.49627700  | 9.49902200  | 11.12528700 |
| H | 7.90558400  | -0.88074000 | -0.16026700 | C | 1.86618600  | 8.53810500  | 12.16897300 |
| H | 8.98960000  | -0.52068800 | 1.19176100  | H | 1.47619900  | 9.46753700  | 12.57612800 |
| H | 7.73641400  | -1.75672700 | 1.37422000  | C | 1.23990400  | 7.32500400  | 12.46746400 |
| C | 2.14976600  | 1.63091700  | 1.73915100  | H | 0.36198300  | 7.30532700  | 13.10787500 |
| H | 1.43382500  | 1.92927900  | 0.96273700  | C | 1.75397400  | 6.13737300  | 11.94455900 |
| C | 2.13616200  | 0.40355100  | 3.92617200  | H | 1.27995300  | 5.18765200  | 12.17919600 |
| H | 3.16456000  | 0.31690100  | 3.57189700  | C | 2.88505000  | 6.16531100  | 11.12555200 |
| H | 2.16226100  | 1.01106500  | 4.83892500  | H | 3.28600100  | 5.23615000  | 10.72513700 |
| C | 1.61665400  | -0.98636700 | 4.24565300  | C | 6.47747800  | 8.03955100  | 11.38588500 |
| C | 1.95073800  | -2.06350900 | 3.40986400  | H | 5.78678400  | 7.63321400  | 12.13711100 |
| H | 2.60350000  | -1.89632000 | 2.55728400  | H | 7.18974700  | 7.22325100  | 11.14677800 |
| C | 1.46231200  | -3.34474300 | 3.67149700  | C | 7.24169500  | 9.19515600  | 12.00634400 |
| H | 1.73924700  | -4.16890600 | 3.01920000  | C | 6.76159500  | 10.51068300 | 11.93560600 |
| C | 0.62987900  | -3.57004200 | 4.77106700  | H | 5.85174300  | 10.70912300 | 11.38030400 |
| H | 0.25123300  | -4.56848300 | 4.97569000  | C | 7.46879100  | 11.55754700 | 12.53356300 |
| C | 0.30199700  | -2.50650300 | 5.61394700  | H | 7.08954700  | 12.57295900 | 12.45439200 |
| H | -0.33545500 | -2.67071800 | 6.47914100  | C | 8.66003300  | 11.30497200 | 13.22018900 |
| C | 0.79627800  | -1.22669200 | 5.35488800  | H | 9.21172300  | 12.11948200 | 13.68141000 |
| H | 0.53613900  | -0.40755400 | 6.01808200  | C | 9.14669300  | 9.99618600  | 13.29626500 |
| H | 2.66678800  | 2.54988500  | 2.06903500  | H | 10.07916400 | 9.78895400  | 13.81452900 |
| C | 0.54839700  | 2.21588600  | 3.44193500  | C | 8.44509600  | 8.95250500  | 12.68627600 |
| H | -0.02889100 | 2.65647400  | 2.62211300  | H | 8.83906100  | 7.94044200  | 12.73188300 |
| H | 1.23254800  | 3.00631500  | 3.80356000  | C | 6.60070200  | 9.77345600  | 5.30939000  |
| C | -0.37748800 | 1.82604700  | 4.57499400  | H | 6.53943300  | 10.65813500 | 5.94406400  |
| C | -1.46433500 | 0.96423400  | 4.37680300  | H | 6.92595500  | 10.06556700 | 4.29833900  |
| H | -1.67564500 | 0.57609200  | 3.38744500  | C | 5.32134400  | 8.94748800  | 5.26936500  |
| C | -2.28833700 | 0.59442300  | 5.43723100  | H | 4.58142800  | 9.34115300  | 4.56645900  |
| H | -3.12715800 | -0.07302000 | 5.26011800  | H | 4.87480800  | 8.93531400  | 6.26843900  |
| C | -2.03842200 | 1.07682100  | 6.72439000  | C | 5.85734200  | 7.55998000  | 4.87541000  |
| H | -2.67920900 | 0.78512700  | 7.55210500  | H | 5.95641700  | 7.48588200  | 3.78645900  |
| C | -0.96291600 | 1.93954400  | 6.93728600  | H | 5.21484400  | 6.73975600  | 5.20836500  |
| H | -0.75869700 | 2.32407400  | 7.93302600  | C | 7.24581100  | 7.52038100  | 5.54593500  |
| C | -0.14376800 | 2.30986400  | 5.86775500  | H | 8.02339200  | 7.11701800  | 4.88558900  |
| H | 0.69715100  | 2.97745400  | 6.04110000  | H | 7.24440100  | 6.93802000  | 6.47472000  |

INT2

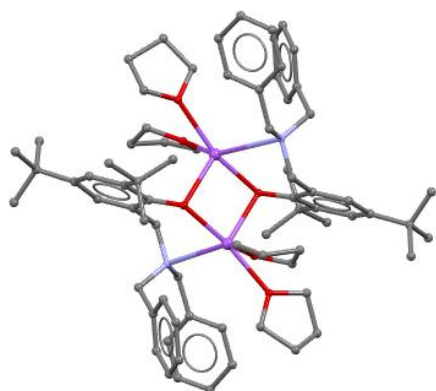

|    |            |            |             |
|----|------------|------------|-------------|
| Na | 0.73488500 | 0.34448400 | -1.37866800 |
| O  | 1.74884100 | 2.70861200 | -1.48082600 |
| C  | 3.15399100 | 2.94274000 | -1.67864400 |
| H  | 3.69374100 | 2.06899400 | -1.31524400 |
| H  | 3.35599100 | 3.07695000 | -2.75106900 |

[(d-tb<sup>Bn</sup>)Na(THF)<sub>2</sub>]<sub>2</sub>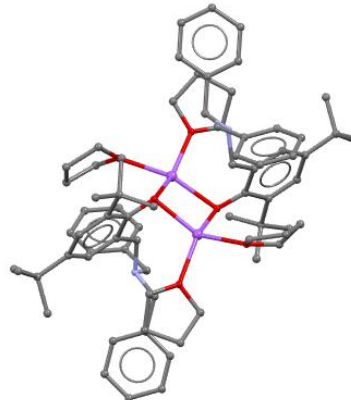

|    |             |             |             |
|----|-------------|-------------|-------------|
| Na | 10.17653400 | 11.35369100 | 9.84534000  |
| O  | 10.41225400 | 9.21076500  | 9.08354600  |
| O  | 9.17308500  | 12.66016300 | 11.48122000 |
| O  | 12.23201300 | 12.10194300 | 10.66992400 |
| N  | 12.65328700 | 11.53908100 | 6.41799900  |



|    |             |             |             |   |             |             |             |
|----|-------------|-------------|-------------|---|-------------|-------------|-------------|
| C  | 3.46048300  | 4.22670700  | -0.91651500 | C | 11.70378500 | 8.96865000  | 9.00581200  |
| H  | 4.37030000  | 4.71982800  | -1.27235600 | C | 12.38769300 | 8.13328500  | 9.94903900  |
| H  | 3.58193700  | 4.00857300  | 0.14821100  | C | 13.76132300 | 7.90876400  | 9.77686300  |
| C  | 2.18396200  | 5.04450900  | -1.16705800 | H | 14.26760600 | 7.26933500  | 10.48676600 |
| H  | 2.25063200  | 5.56297300  | -2.13081200 | C | 14.52076900 | 8.48053800  | 8.74594100  |
| H  | 1.99150800  | 5.79634200  | -0.39596500 | C | 13.84227600 | 9.32046200  | 7.85412000  |
| C  | 1.08890800  | 3.96350700  | -1.21228000 | H | 14.37729800 | 9.81259500  | 7.04773700  |
| H  | 0.34841700  | 4.15225600  | -1.99574500 | C | 12.48092700 | 9.57416000  | 7.96585800  |
| H  | 0.55763700  | 3.86467100  | -0.26017000 | C | 11.62612000 | 7.52870700  | 11.14874100 |
| Na | -0.30989900 | -0.33055200 | 1.71619400  | C | 12.53888600 | 6.68716100  | 12.06220500 |
| O  | -1.15490100 | 0.75878600  | -0.27213300 | H | 12.98348200 | 5.84011800  | 11.52717500 |
| O  | -1.11325400 | -2.85433600 | 1.80167900  | H | 11.95101500 | 6.28005900  | 12.89338300 |
| N  | -1.34329100 | -1.63167700 | -2.54251500 | H | 13.35140300 | 7.28434700  | 12.49274900 |
| C  | -2.44815900 | 0.56436000  | -0.37479400 | C | 10.47807500 | 6.61445000  | 10.66346500 |
| C  | -3.42653900 | 1.58372500  | -0.09384800 | H | 9.77815300  | 7.18902700  | 10.05484300 |
| C  | -4.78290600 | 1.23939000  | -0.08818000 | H | 9.93349800  | 6.19103400  | 11.51810900 |
| H  | -5.50038700 | 2.01008000  | 0.15684700  | H | 10.87079500 | 5.78098700  | 10.06820700 |
| C  | -5.26848100 | -0.04498800 | -0.36759500 | C | 11.01950400 | 8.65777100  | 12.01871200 |
| C  | -4.31445400 | -0.99454800 | -0.74401800 | H | 11.79405700 | 9.35818700  | 12.35141100 |
| H  | -4.63422500 | -1.99718000 | -1.02518900 | H | 10.53930600 | 8.23592000  | 12.91175800 |
| C  | -2.94657700 | -0.71667000 | -0.77643600 | H | 10.26335100 | 9.20798600  | 11.45599700 |
| C  | -2.99567700 | 3.04276800  | 0.15655300  | C | 16.03315700 | 8.26384200  | 8.58484900  |
| C  | -4.17565200 | 3.97289200  | 0.49881600  | C | 16.76530500 | 9.61411900  | 8.77437400  |
| H  | -4.91273200 | 4.02173800  | -0.31067000 | H | 16.42294600 | 10.36490900 | 8.05438900  |
| H  | -3.80020400 | 4.98988200  | 0.66332600  | H | 17.84933300 | 9.49415700  | 8.64765300  |
| H  | -4.69141000 | 3.65937200  | 1.41453900  | H | 16.58128700 | 10.01387100 | 9.77886400  |
| C  | -2.33467900 | 3.57565200  | -1.13377100 | C | 16.33421500 | 7.71637400  | 7.17001400  |
| H  | -1.48024000 | 2.95134800  | -1.39611400 | H | 15.82447400 | 6.75901000  | 7.01043900  |
| H  | -1.98362800 | 4.60750000  | -0.99733800 | H | 17.41206900 | 7.55923300  | 7.03400500  |
| H  | -3.04670100 | 3.56298500  | -1.96714500 | H | 15.99701500 | 8.40635000  | 6.38919000  |
| C  | -1.98164700 | 3.13773500  | 1.31628000  | C | 16.59833000 | 7.26466600  | 9.61086700  |
| H  | -2.42310000 | 2.80165900  | 2.26176500  | H | 16.46233900 | 7.61894400  | 10.63916000 |
| H  | -1.65736200 | 4.17803600  | 1.45669300  | H | 17.67385700 | 7.12856300  | 9.44742000  |
| H  | -1.11351500 | 2.51683600  | 1.09725400  | H | 16.11940000 | 6.28260800  | 9.52281400  |
| C  | -6.75304300 | -0.42938600 | -0.27875800 | C | 11.79060900 | 10.47843700 | 6.96013300  |
| C  | -6.92618100 | -1.54794900 | 0.77654100  | H | 11.44384200 | 9.87846900  | 6.11245100  |
| H  | -6.33784000 | -2.43596200 | 0.52059700  | H | 10.89038800 | 10.93151100 | 7.40609500  |
| H  | -7.97768500 | -1.85310800 | 0.85690700  | C | 12.86616200 | 12.56993200 | 7.43171300  |
| H  | -6.59461900 | -1.20114300 | 1.76313200  | H | 12.98873700 | 12.05224300 | 8.38585600  |
| C  | -7.24913100 | -0.94408200 | -1.64992300 | H | 11.96757600 | 13.20985800 | 7.54510800  |
| H  | -7.14005000 | -0.16723900 | -2.41526200 | C | 14.08377300 | 13.43776000 | 7.20118400  |
| H  | -8.30762500 | -1.23058700 | -1.59930900 | C | 15.26637000 | 12.89307100 | 6.68355400  |
| H  | -6.68257500 | -1.82050100 | -1.98227900 | H | 15.26799300 | 11.85419000 | 6.37070500  |
| C  | -7.64351800 | 0.75626600  | 0.13609900  | C | 16.41635200 | 13.67388800 | 6.56418000  |
| H  | -7.36014900 | 1.15030500  | 1.11901600  | H | 17.32577100 | 13.23511100 | 6.16150100  |
| H  | -8.69000300 | 0.43482600  | 0.19518500  | C | 16.40248700 | 15.01323100 | 6.96146300  |
| H  | -7.58783500 | 1.57652400  | -0.58853400 | H | 17.29886500 | 15.62079400 | 6.86987000  |
| C  | -2.00301300 | -1.80808300 | -1.21523500 | C | 15.22614100 | 15.56829100 | 7.46885600  |
| H  | -1.19601100 | -1.94158900 | -0.48775100 | H | 15.20027300 | 16.61318000 | 7.76771200  |
| C  | -2.26404400 | -1.16412700 | -3.60850200 | C | 14.07536200 | 14.78530200 | 7.58135000  |
| H  | -3.18153700 | -0.81064100 | -3.13197600 | H | 13.15701500 | 15.22523100 | 7.96550900  |
| H  | -2.55250000 | -1.98999400 | -4.27306700 | C | 12.09494000 | 12.12847000 | 5.19765600  |
| C  | -1.69217700 | -0.01805200 | -4.41939100 | H | 12.75247500 | 12.96144100 | 4.91614600  |
| C  | -1.58944000 | 1.24650800  | -3.82153400 | H | 11.09613400 | 12.56547900 | 5.38234200  |
| H  | -1.90257400 | 1.36379900  | -2.79025900 | C | 12.01191600 | 11.14884100 | 4.04662800  |
| C  | -1.11794900 | 2.34315300  | -4.54143000 | C | 13.08683600 | 10.29863400 | 3.75411100  |
| H  | -1.06209400 | 3.31696400  | -4.06051700 | H | 13.96630900 | 10.32953200 | 4.39058500  |
| C  | -0.73664700 | 2.19049900  | -5.87808200 | C | 13.01940400 | 9.41215700  | 2.67961000  |

|   |             |             |             |    |             |             |             |
|---|-------------|-------------|-------------|----|-------------|-------------|-------------|
| H | -0.37479900 | 3.04396100  | -6.44617300 | H  | 13.85886600 | 8.75422700  | 2.46985800  |
| C | -0.82638300 | 0.93318100  | -6.47953000 | C  | 11.87661200 | 9.36609400  | 1.87556800  |
| H | -0.52636600 | 0.80253600  | -7.51635100 | H  | 11.82504300 | 8.67579800  | 1.03775500  |
| C | -1.30155200 | -0.16397600 | -5.75428200 | C  | 10.80061800 | 10.20928400 | 2.15905600  |
| H | -1.35826100 | -1.14112700 | -6.22615500 | H  | 9.90497200  | 10.17760100 | 1.54386600  |
| C | -2.50262200 | -3.24583500 | 1.78309300  | C  | 10.86690000 | 11.08913200 | 3.24296700  |
| H | -3.06537800 | -2.49543000 | 1.22604500  | H  | 10.02144300 | 11.73425900 | 3.46992700  |
| H | -2.87668200 | -3.27099400 | 2.81489500  | C  | 9.15423000  | 12.23937300 | 12.86600900 |
| C | -2.54587900 | -4.63995500 | 1.15337600  | H  | 10.12767500 | 12.46633500 | 13.31780800 |
| H | -3.39913900 | -5.22967500 | 1.50210300  | H  | 9.00645900  | 11.15378000 | 12.88770700 |
| H | -2.60459400 | -4.56552600 | 0.06189700  | C  | 7.98891100  | 12.98675500 | 13.53685100 |
| C | -1.18618600 | -5.21569000 | 1.57290900  | H  | 7.46026500  | 12.35535400 | 14.25427100 |
| H | -1.22640200 | -5.57271800 | 2.60941500  | H  | 8.35610500  | 13.87598100 | 14.06309200 |
| H | -0.84454400 | -6.04061600 | 0.94056000  | C  | 7.11382700  | 13.40070000 | 12.34133400 |
| C | -0.28521200 | -3.98422100 | 1.46837900  | H  | 6.46178300  | 12.57948200 | 12.02689200 |
| H | 0.56021300  | -4.00572700 | 2.15752800  | H  | 6.48820900  | 14.27429700 | 12.54824000 |
| H | 0.10789300  | -3.85293600 | 0.45199600  | C  | 8.16281200  | 13.67062700 | 11.26834900 |
| H | -2.57525700 | -2.75436500 | -1.22527000 | H  | 7.79368700  | 13.56392800 | 10.24761800 |
| C | -0.72364100 | -2.92894600 | -2.88376300 | H  | 8.61529400  | 14.66704200 | 11.39042100 |
| H | 0.01157300  | -3.15071000 | -2.10268000 | C  | 13.45030200 | 11.42785000 | 11.05134800 |
| H | -1.48391800 | -3.73423900 | -2.83740600 | H  | 13.51950200 | 10.51539700 | 10.46017500 |
| C | -0.05786800 | -2.98861600 | -4.23958500 | H  | 13.40104100 | 11.16220000 | 12.11828800 |
| C | 1.11652700  | -2.27242900 | -4.49312000 | C  | 14.55473100 | 12.44550800 | 10.78438200 |
| H | 1.53736100  | -1.65585300 | -3.70917700 | H  | 15.46269700 | 12.23920300 | 11.35910700 |
| C | 1.72335800  | -2.32300300 | -5.74685400 | H  | 14.81967600 | 12.45064900 | 9.72283200  |
| H | 2.63807200  | -1.76455000 | -5.92555700 | C  | 13.87822000 | 13.76953600 | 11.18542400 |
| C | 1.16189000  | -3.08771700 | -6.77279800 | H  | 14.00474000 | 13.95494800 | 12.25805700 |
| H | 1.63473700  | -3.12395900 | -7.75075100 | H  | 14.28405700 | 14.62661500 | 10.64094600 |
| C | -0.00768200 | -3.80898700 | -6.53050100 | C  | 12.39234700 | 13.52622800 | 10.85227800 |
| H | -0.45249900 | -4.41067100 | -7.31889200 | H  | 11.71152000 | 13.86235900 | 11.64252700 |
| C | -0.60827500 | -3.75984000 | -5.26977900 | H  | 12.09547200 | 14.01012700 | 9.91471200  |
| H | -1.52022700 | -4.32328600 | -5.08525800 | Na | 9.00798900  | 9.48315400  | 7.31252000  |
| O | 1.59556500  | -0.69760900 | 0.62182200  | O  | 8.65212500  | 11.55019200 | 8.21851400  |
| N | 1.54011600  | 1.58846700  | 2.98928100  | O  | 9.96816000  | 7.67938600  | 6.11837800  |
| C | 2.86345200  | -0.36731500 | 0.68869800  | O  | 7.03028300  | 9.01284000  | 6.15247600  |
| C | 3.92756500  | -1.24597100 | 0.27586100  | N  | 6.44034700  | 8.92203200  | 10.48902300 |
| C | 5.23640300  | -0.75060900 | 0.23834100  | C  | 7.38247100  | 11.85600400 | 8.38746500  |
| H | 6.01855400  | -1.41124800 | -0.10945400 | C  | 6.74168500  | 12.89659900 | 7.63557400  |
| C | 5.59585700  | 0.54922800  | 0.62165300  | C  | 5.36882600  | 13.11599000 | 7.81774300  |
| C | 4.56812000  | 1.34815500  | 1.12969400  | H  | 4.89441000  | 13.89233400 | 7.23294300  |
| H | 4.79554200  | 2.35067000  | 1.48833100  | C  | 4.57573300  | 12.38066000 | 8.70976900  |
| C | 3.23842900  | 0.92618800  | 1.17575200  | C  | 5.22850900  | 11.40666300 | 9.47347100  |
| C | 3.65023700  | -2.73180400 | -0.03535600 | H  | 4.67464700  | 10.81712400 | 10.19874900 |
| C | 4.89630500  | -3.48574800 | -0.53979800 | C  | 6.58820200  | 11.14342800 | 9.34322000  |
| H | 5.70431500  | -3.49566000 | 0.20027600  | C  | 7.56093000  | 13.74213400 | 6.63815600  |
| H | 4.63000500  | -4.52874100 | -0.74811000 | C  | 6.72020700  | 14.84514900 | 5.96587300  |
| H | 5.28681900  | -3.05243200 | -1.46876800 | H  | 6.29851800  | 15.54165600 | 6.69993600  |
| C | 3.18836300  | -3.40244600 | 1.27732100  | H  | 7.35406700  | 15.42485900 | 5.28434000  |
| H | 2.29203900  | -2.90336100 | 1.64426400  | H  | 5.89506500  | 14.43023500 | 5.37510900  |
| H | 2.95473900  | -4.46397200 | 1.11645600  | C  | 8.73478500  | 14.43671700 | 7.37123500  |
| H | 3.96624000  | -3.33329600 | 2.04625200  | H  | 9.38584300  | 13.69298100 | 7.83373100  |
| C | 2.54696900  | -2.90897800 | -1.10039400 | H  | 9.32727400  | 15.03556900 | 6.66647900  |
| H | 2.85591900  | -2.48666000 | -2.06005600 | H  | 8.35722500  | 15.10948100 | 8.15149400  |
| H | 2.33968700  | -3.97564700 | -1.26189300 | C  | 8.12866300  | 12.84298500 | 5.51377700  |
| H | 1.63364100  | -2.41141500 | -0.77600800 | H  | 7.31903800  | 12.36282200 | 4.95141300  |
| C | 7.02012700  | 1.10921000  | 0.48913600  | H  | 8.72048600  | 13.44193100 | 4.80808900  |
| C | 6.99942300  | 2.31449700  | -0.48209600 | H  | 8.77018300  | 12.06806400 | 5.93548500  |
| H | 6.33767500  | 3.10928400  | -0.12090700 | C  | 3.06537200  | 12.60181000 | 8.88489200  |

|   |             |             |             |   |             |             |             |
|---|-------------|-------------|-------------|---|-------------|-------------|-------------|
| H | 8.00391700  | 2.74116600  | -0.60169900 | C | 2.31119300  | 11.29272900 | 8.55175700  |
| H | 6.63940400  | 2.00512100  | -1.47136200 | H | 2.62052700  | 10.47234300 | 9.20825400  |
| C | 7.53878800  | 1.57724600  | 1.86823300  | H | 1.22747900  | 11.42407000 | 8.66860100  |
| H | 7.56850600  | 0.73891100  | 2.57348100  | H | 2.51064900  | 10.98351400 | 7.51907400  |
| H | 8.55189800  | 1.99128200  | 1.78349800  | C | 2.76455400  | 13.00047700 | 10.34905200 |
| H | 6.89766600  | 2.35294900  | 2.30023200  | H | 3.28008800  | 13.93261600 | 10.60816900 |
| C | 8.01166700  | 0.06987600  | -0.06550800 | H | 1.68748500  | 13.15009600 | 10.50045900 |
| H | 7.71874100  | -0.27679600 | -1.06338800 | H | 3.09813300  | 12.23006600 | 11.05272100 |
| H | 9.01087800  | 0.51343400  | -0.14775600 | C | 2.52119200  | 13.71096200 | 7.96618400  |
| H | 8.08851700  | -0.80511500 | 0.58991800  | H | 2.68015600  | 13.47263600 | 6.90811900  |
| C | 2.19632100  | 1.89358100  | 1.67803500  | H | 1.44264700  | 13.83106800 | 8.12245400  |
| H | 1.38744800  | 1.99378500  | 0.94690400  | H | 2.99681400  | 14.67654900 | 8.17278700  |
| C | 2.45685200  | 1.02291500  | 4.00935000  | C | 7.23823500  | 10.14303000 | 10.28086600 |
| H | 3.34714000  | 0.65883100  | 3.49078700  | H | 7.36662700  | 10.61001700 | 11.26262900 |
| H | 2.79499700  | 1.79807500  | 4.71265000  | H | 8.24457400  | 9.87480300  | 9.93025900  |
| C | 1.84874400  | -0.14117000 | 4.76792900  | C | 6.52986600  | 8.05638000  | 9.31639500  |
| C | 1.71340400  | -1.37629200 | 4.11671200  | H | 6.46044300  | 8.70842900  | 8.44028300  |
| H | 2.02715000  | -1.45817500 | 3.08096300  | H | 7.51518700  | 7.55162900  | 9.25696500  |
| C | 1.19760600  | -2.48544000 | 4.78621300  | C | 5.42508000  | 7.02907900  | 9.22830100  |
| H | 1.11513500  | -3.43783500 | 4.26914000  | C | 4.09195800  | 7.41603200  | 9.42234600  |
| C | 0.80045600  | -2.37576200 | 6.12167200  | H | 3.88570800  | 8.44397500  | 9.70490700  |
| H | 0.40170900  | -3.23962500 | 6.64780000  | C | 3.05517500  | 6.49989300  | 9.25320900  |
| C | 0.92348100  | -1.14848200 | 6.77591100  | H | 2.02559000  | 6.81625200  | 9.40004100  |
| H | 0.61335900  | -1.04954300 | 7.81325000  | C | 3.33672200  | 5.17869700  | 8.89155400  |
| C | 1.44807600  | -0.04095000 | 6.10420100  | H | 2.52845500  | 4.46448500  | 8.75840100  |
| H | 1.53367500  | 0.91069500  | 6.61995300  | C | 4.66222200  | 4.78027500  | 8.71059800  |
| H | 2.67662700  | 2.88559000  | 1.74863300  | H | 4.89122700  | 3.75227700  | 8.44155800  |
| C | 0.92828600  | 2.85493500  | 3.44701500  | C | 5.69868600  | 5.70153700  | 8.88306100  |
| H | 0.22326700  | 3.16784000  | 2.67220900  | H | 6.73220900  | 5.38870900  | 8.74650600  |
| H | 1.70427500  | 3.64375500  | 3.50087600  | C | 6.83837100  | 8.21182600  | 11.70543900 |
| C | 0.22368000  | 2.80211100  | 4.78269700  | H | 6.29767900  | 7.25626500  | 11.71270300 |
| C | -0.97548000 | 2.09830500  | 4.94200600  | H | 7.91588600  | 7.96198500  | 11.69887300 |
| H | -1.39956700 | 1.57103000  | 4.09440600  | C | 6.50174600  | 8.97964000  | 12.96721700 |
| C | -1.60272000 | 2.04206700  | 6.18624100  | C | 5.27458400  | 9.64578300  | 13.09025700 |
| H | -2.52419100 | 1.47791000  | 6.30102300  | H | 4.58339200  | 9.62358700  | 12.25369000 |
| C | -1.04894900 | 2.69713500  | 7.28922600  | C | 4.95168500  | 10.33206500 | 14.26035800 |
| H | -1.54044600 | 2.64973100  | 8.25747700  | H | 3.99760000  | 10.84733300 | 14.33773800 |
| C | 0.13620700  | 3.41714600  | 7.13688000  | C | 5.84818700  | 10.35474300 | 15.33328300 |
| H | 0.57407800  | 3.93694500  | 7.98516200  | H | 5.59473800  | 10.88567200 | 16.24720800 |
| C | 0.76410700  | 3.46678500  | 5.88998500  | C | 7.07298300  | 9.69385600  | 15.22045400 |
| H | 1.69214300  | 4.02260400  | 5.77635100  | H | 7.78007200  | 9.70984300  | 16.04607100 |
| O | 2.48420400  | 0.27331000  | -3.08478400 | C | 7.39775400  | 9.01789000  | 14.04137000 |
| C | 3.83742800  | -0.19987200 | -3.21016500 | H | 8.35704200  | 8.51297900  | 13.95313400 |
| H | 4.26671400  | -0.24153000 | -2.20782100 | C | 10.68532100 | 7.55343800  | 4.88117600  |
| H | 3.83543700  | -1.21567700 | -3.63408100 | H | 10.19120200 | 6.79813300  | 4.24869400  |
| C | 4.52094800  | 0.77927800  | -4.16183300 | H | 10.65010200 | 8.51645700  | 4.37053300  |
| H | 5.38869400  | 0.33684800  | -4.66072400 | C | 12.09432900 | 7.10583700  | 5.29249800  |
| H | 4.86044100  | 1.66462200  | -3.61576100 | H | 12.72096100 | 7.97739000  | 5.49270500  |
| C | 3.38155200  | 1.13246100  | -5.13653200 | H | 12.57869900 | 6.51669300  | 4.50806400  |
| H | 3.34784600  | 0.41062700  | -5.95972400 | C | 11.85857900 | 6.30725700  | 6.60169400  |
| H | 3.49080000  | 2.12794500  | -5.57729400 | H | 12.49894100 | 6.68087200  | 7.40386800  |
| C | 2.11311200  | 1.01922900  | -4.27139900 | H | 12.05697400 | 5.23811100  | 6.47568300  |
| H | 1.30173900  | 0.49578200  | -4.78166500 | C | 10.36929600 | 6.55614800  | 6.92316300  |
| H | 1.73769100  | 1.98811600  | -3.93451800 | H | 10.18583100 | 6.82458700  | 7.96187100  |
| O | -2.17332400 | -0.37456000 | 3.18966600  | H | 9.74868700  | 5.68675200  | 6.65428100  |
| C | -2.03889600 | -1.12771400 | 4.42125800  | C | 5.91217500  | 9.85125900  | 5.80315900  |
| H | -1.55998600 | -2.08166300 | 4.19201500  | H | 5.98255000  | 10.75964100 | 6.40056700  |
| H | -1.37532500 | -0.56842600 | 5.08574400  | H | 5.96870700  | 10.11238800 | 4.73453400  |

|   |             |             |            |   |            |            |            |
|---|-------------|-------------|------------|---|------------|------------|------------|
| C | -3.45762200 | -1.27470100 | 4.99404200 | C | 4.68926700 | 8.99195500 | 6.10700700 |
| H | -3.46706600 | -1.21442200 | 6.08668200 | H | 3.79695600 | 9.32289300 | 5.56679100 |
| H | -3.89329000 | -2.23941500 | 4.70863800 | H | 4.46970300 | 9.02955100 | 7.17738600 |
| C | -4.22941700 | -0.13017200 | 4.31465700 | C | 5.15637100 | 7.58076300 | 5.69138800 |
| H | -4.08039900 | 0.81356100  | 4.85128600 | H | 4.86329500 | 7.36325000 | 4.65870600 |
| H | -5.30591300 | -0.31594200 | 4.24680900 | H | 4.73392600 | 6.80416600 | 6.33406200 |
| C | -3.56093800 | -0.06624700 | 2.94479500 | C | 6.69782000 | 7.64961100 | 5.81051800 |
| H | -3.60646700 | 0.91013400  | 2.46533400 | H | 7.20286000 | 7.37939500 | 4.87499600 |
| H | -3.98788500 | -0.79699900 | 2.24793000 | H | 7.09027800 | 7.01143400 | 6.60711600 |

**Table S8.** DFT optimized structures and atom coordinates of complexes for transformation pathways from “closed”  $[(d\text{-}t\text{b}^{\text{Bn}})\text{Na}(\text{THF})_2]$  to “opened”  $[(d\text{-}t\text{b}^{\text{Bn}})\text{Na}(\text{THF})_2]_2$  structures.

| INT1                                                                               |             |             |             | 2                                                                                    |             |             |              |
|------------------------------------------------------------------------------------|-------------|-------------|-------------|--------------------------------------------------------------------------------------|-------------|-------------|--------------|
| 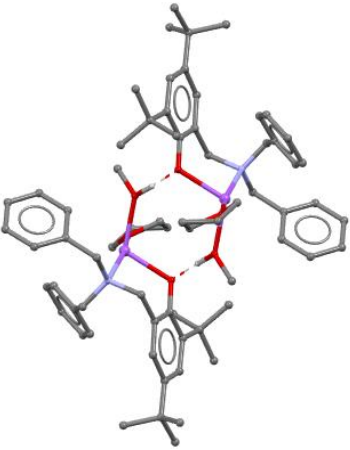 |             |             |             |  |             |             |              |
| Na                                                                                 | 9.82233700  | 6.61627000  | -8.03924000 | Na                                                                                   | 10.17680000 | 10.74210000 | -10.34170000 |
| O                                                                                  | 8.96971800  | 8.76644100  | -7.61394700 | O                                                                                    | 10.42300000 | 8.72930000  | -9.38320000  |
| C                                                                                  | 10.00810100 | 9.53419900  | -6.95504400 | O                                                                                    | 12.15520000 | 11.56360000 | -11.12550000 |
| H                                                                                  | 10.60274300 | 8.84687700  | -6.34578700 | N                                                                                    | 12.27990000 | 11.39040000 | -6.69400000  |
| H                                                                                  | 10.64955100 | 9.96957500  | -7.72694600 | C                                                                                    | 11.73140000 | 8.56710000  | -9.15920000  |
| C                                                                                  | 9.28845500  | 10.61276400 | -6.14089700 | C                                                                                    | 12.52280000 | 7.60340000  | -9.85650000  |
| H                                                                                  | 9.88328800  | 11.52664000 | -6.04934500 | C                                                                                    | 13.89990000 | 7.54580000  | -9.59130000  |
| H                                                                                  | 9.06410900  | 10.24672800 | -5.13440400 | H                                                                                    | 14.49110000 | 6.81780000  | -10.12900000 |
| C                                                                                  | 7.98937800  | 10.80726800 | -6.93909500 | C                                                                                    | 14.54850000 | 8.37600000  | -8.66930000  |
| H                                                                                  | 8.16749500  | 11.44804800 | -7.81123500 | C                                                                                    | 13.74770000 | 9.28380000  | -7.96820000  |
| H                                                                                  | 7.17784100  | 11.24566100 | -6.35041000 | H                                                                                    | 14.18320000 | 9.94150000  | -7.22440000  |
| C                                                                                  | 7.68642700  | 9.37622300  | -7.38365300 | C                                                                                    | 12.37880000 | 9.38640000  | -8.18950000  |
| H                                                                                  | 7.10979100  | 9.30853800  | -8.31088900 | C                                                                                    | 11.87380000 | 6.64710000  | -10.87580000 |
| H                                                                                  | 7.15579700  | 8.81517600  | -6.60435000 | C                                                                                    | 12.87810000 | 5.64930000  | -11.48480000 |
| O                                                                                  | 10.53914800 | 6.13170300  | -6.01013300 | H                                                                                    | 13.34040000 | 5.01550000  | -10.71930000 |
| N                                                                                  | 9.96368500  | 4.04910700  | -8.48350400 | H                                                                                    | 12.35520000 | 4.99080000  | -12.18840000 |
| C                                                                                  | 10.02800500 | 5.09154100  | -5.36957800 | H                                                                                    | 13.67720000 | 6.15520000  | -12.03930000 |
| C                                                                                  | 9.40090900  | 5.21022200  | -4.09053100 | C                                                                                    | 10.75660000 | 5.82500000  | -10.18980000 |
| C                                                                                  | 8.86056200  | 4.06207100  | -3.49899100 | H                                                                                    | 9.99990000  | 6.48410000  | -9.76150000  |
| H                                                                                  | 8.37333700  | 4.16679700  | -2.53957500 | H                                                                                    | 10.27220000 | 5.15680000  | -10.91390000 |
| C                                                                                  | 8.92302600  | 2.78284100  | -4.07005400 | H                                                                                    | 11.17730000 | 5.20510000  | -9.38840000  |
| C                                                                                  | 9.57535600  | 2.68291500  | -5.30336300 | C                                                                                    | 11.26820000 | 7.46670000  | -12.03650000 |
| H                                                                                  | 9.66957800  | 1.71164400  | -5.78648000 | H                                                                                    | 12.04210000 | 8.05520000  | -12.54530000 |
| C                                                                                  | 10.10509900 | 3.79445600  | -5.95776000 | H                                                                                    | 10.79650000 | 6.80820000  | -12.77780000 |
| C                                                                                  | 9.30038800  | 6.58330300  | -3.39862000 | H                                                                                    | 10.51170000 | 8.14480000  | -11.64270000 |

|    |             |             |              |    |             |             |              |
|----|-------------|-------------|--------------|----|-------------|-------------|--------------|
| C  | 8.67290700  | 6.49699200  | -1.99326900  | C  | 16.05760000 | 8.31290000  | -8.38280000  |
| H  | 7.64190700  | 6.12519800  | -2.02283600  | C  | 16.70320000 | 9.68630000  | -8.68130000  |
| H  | 8.64780800  | 7.49667700  | -1.54353400  | H  | 16.25260000 | 10.48750000 | -8.08590000  |
| H  | 9.25243400  | 5.84780000  | -1.32639500  | H  | 17.77780000 | 9.66670000  | -8.45770000  |
| C  | 8.40986000  | 7.51571700  | -4.25066900  | H  | 16.58040000 | 9.94910000  | -9.73810000  |
| H  | 8.81730800  | 7.62676400  | -5.25542900  | C  | 16.28510000 | 7.96220000  | -6.89340000  |
| H  | 8.33498400  | 8.50658300  | -3.78192600  | H  | 15.83650000 | 6.99180000  | -6.65150000  |
| H  | 7.39618500  | 7.10711800  | -4.33652800  | H  | 17.35750000 | 7.91170000  | -6.66490000  |
| C  | 10.70627200 | 7.21037300  | -3.23771500  | H  | 15.83760000 | 8.71110000  | -6.23090000  |
| H  | 11.34358200 | 6.57566400  | -2.60965500  | C  | 16.77510000 | 7.25290000  | -9.23840000  |
| H  | 10.63588200 | 8.19392600  | -2.75457300  | H  | 16.66790000 | 7.45890000  | -10.30970000 |
| H  | 11.18773400 | 7.32910500  | -4.20795900  | H  | 17.84640000 | 7.24760000  | -9.00610000  |
| C  | 8.31844700  | 1.53228700  | -3.41162700  | H  | 16.38780000 | 6.24610000  | -9.04450000  |
| C  | 9.43039100  | 0.48913700  | -3.15339300  | C  | 11.53110000 | 10.30480000 | -7.33030000  |
| H  | 9.92868000  | 0.19174300  | -4.08232100  | H  | 11.09950000 | 9.68880000  | -6.53580000  |
| H  | 9.01508600  | -0.41621500 | -2.69209100  | H  | 10.67300000 | 10.69830000 | -7.89660000  |
| H  | 10.19404100 | 0.89705400  | -2.48118400  | C  | 12.52490000 | 12.46610000 | -7.65390000  |
| C  | 7.25479600  | 0.91909300  | -4.35285200  | H  | 12.74710000 | 11.98080000 | -8.60940000  |
| H  | 6.45040400  | 1.63817500  | -4.54768600  | H  | 11.61330000 | 13.06400000 | -7.83120000  |
| H  | 6.81024400  | 0.02012700  | -3.90655500  | C  | 13.68340000 | 13.37180000 | -7.29600000  |
| H  | 7.68662300  | 0.63360600  | -5.31817000  | C  | 14.81590000 | 12.88100000 | -6.63360000  |
| C  | 7.63757100  | 1.84609600  | -2.06654100  | H  | 14.82110000 | 11.84800000 | -6.30200000  |
| H  | 8.34708600  | 2.25776100  | -1.33972600  | C  | 15.91170000 | 13.70940000 | -6.38780000  |
| H  | 7.21775400  | 0.92828400  | -1.63848900  | H  | 16.78210000 | 13.31180000 | -5.87190000  |
| H  | 6.81697000  | 2.56285200  | -2.18594600  | C  | 15.89290000 | 15.04330000 | -6.80150000  |
| C  | 10.77238000 | 3.62231900  | -7.29965500  | H  | 16.74680000 | 15.68790000 | -6.61120000  |
| H  | 11.69181500 | 4.21293500  | -7.33351800  | C  | 14.76430000 | 15.54560000 | -7.45260000  |
| C  | 8.58440100  | 3.48107300  | -8.46621700  | H  | 14.73320000 | 16.58600000 | -7.76630000  |
| H  | 8.51652100  | 2.65973300  | -7.74552800  | C  | 13.66700000 | 14.71570000 | -7.69040000  |
| H  | 8.36350300  | 3.05898700  | -9.44929700  | H  | 12.78350000 | 15.11330000 | -8.18640000  |
| C  | 7.53926900  | 4.53541800  | -8.15458900  | C  | 11.63550000 | 11.88770000 | -5.47520000  |
| C  | 6.99766800  | 4.67733000  | -6.87029800  | H  | 12.26780000 | 12.69500000 | -5.08280000  |
| H  | 7.31949600  | 4.01409100  | -6.07353800  | H  | 10.64840000 | 12.33680000 | -5.69290000  |
| C  | 6.05760100  | 5.67637400  | -6.60625300  | C  | 11.48020000 | 10.80350000 | -4.42290000  |
| H  | 5.64688000  | 5.77201400  | -5.60488600  | C  | 12.44590000 | 9.79710000  | -4.27210000  |
| C  | 5.65052800  | 6.54845300  | -7.61720500  | H  | 13.31650000 | 9.80510000  | -4.91990000  |
| H  | 4.91794100  | 7.32375800  | -7.40819900  | C  | 12.26970000 | 8.77480000  | -3.34040000  |
| C  | 6.18790300  | 6.41808800  | -8.90103100  | H  | 13.02510000 | 7.99890000  | -3.24610000  |
| H  | 5.87044700  | 7.08659800  | -9.69761500  | C  | 11.12670000 | 8.73920000  | -2.53560000  |
| C  | 7.12373000  | 5.41653900  | -9.16795100  | H  | 10.99010000 | 7.93930000  | -1.81280000  |
| H  | 7.53519900  | 5.31011300  | -10.16943800 | C  | 10.16730000 | 9.74450000  | -2.66330000  |
| H  | 11.05313000 | 2.55954100  | -7.41990600  | H  | 9.27950000  | 9.73850000  | -2.03570000  |
| C  | 10.70973800 | 3.66705500  | -9.70769400  | C  | 10.34580000 | 10.76880000 | -3.59960000  |
| H  | 11.72008100 | 4.07782600  | -9.59856400  | H  | 9.60010000  | 11.55460000 | -3.68240000  |
| H  | 10.81582600 | 2.56792900  | -9.77265800  | C  | 13.39780000 | 10.89450000 | -11.41920000 |
| C  | 10.09334000 | 4.19638200  | -10.98358500 | H  | 13.35990000 | 9.91120000  | -10.94900000 |
| C  | 10.24120700 | 5.54777500  | -11.32246200 | H  | 13.50290000 | 10.77640000 | -12.50920000 |
| H  | 10.83801900 | 6.19017000  | -10.68383300 | C  | 14.46810000 | 11.82140000 | -10.84990000 |
| C  | 9.62964500  | 6.06674000  | -12.46327500 | H  | 15.44670000 | 11.66630000 | -11.31360000 |
| H  | 9.75840200  | 7.11718900  | -12.71090700 | H  | 14.57510000 | 11.64530000 | -9.77640000  |
| C  | 8.86519700  | 5.23783000  | -13.28975500 | C  | 13.89030000 | 13.22560000 | -11.12800000 |
| H  | 8.38878500  | 5.64105900  | -14.17942900 | H  | 14.27550000 | 13.62430000 | -12.07230000 |
| C  | 8.73000500  | 3.88509600  | -12.97374200 | H  | 14.14510000 | 13.93370000 | -10.33520000 |
| H  | 8.14813400  | 3.22969800  | -13.61642300 | C  | 12.36420000 | 12.99090000 | -11.22490000 |
| C  | 9.34475600  | 3.36967100  | -11.82966200 | H  | 11.95680000 | 13.34780000 | -12.18030000 |
| H  | 9.23870100  | 2.31363000  | -11.59044700 | H  | 11.79620000 | 13.44660000 | -10.40970000 |
| Na | 14.67955200 | 6.92363400  | -7.08367900  | Na | 8.61860000  | 9.96010000  | -6.15700000  |
| O  | 15.53194000 | 4.77294200  | -7.50858100  | O  | 8.37400000  | 11.97230000 | -7.11650000  |

|   |             |             |              |   |            |             |              |
|---|-------------|-------------|--------------|---|------------|-------------|--------------|
| C | 14.49350200 | 4.00489200  | -8.16694900  | O | 6.64030000 | 9.13700000  | -5.37370000  |
| H | 13.89895600 | 4.69189200  | -8.77666900  | N | 6.51790000 | 9.31130000  | -9.80570000  |
| H | 13.85196700 | 3.57008300  | -7.39479600  | C | 7.06570000 | 12.13450000 | -7.34070000  |
| C | 15.21302700 | 2.92572800  | -8.98041400  | C | 6.27400000 | 13.09740000 | -6.64260000  |
| H | 14.61806200 | 2.01189100  | -9.07150400  | C | 4.89690000 | 13.15480000 | -6.90780000  |
| H | 15.43751900 | 3.29118100  | -9.98708200  | H | 4.30540000 | 13.88210000 | -6.36950000  |
| C | 16.51194900 | 2.73142200  | -8.18192100  | C | 4.24850000 | 12.32510000 | -7.83050000  |
| H | 16.33356500 | 2.09109800  | -7.30950300  | C | 5.04970000 | 11.41830000 | -8.53240000  |
| H | 17.32350800 | 2.29259000  | -8.77025000  | H | 4.61430000 | 10.76090000 | -9.27660000  |
| C | 16.81512600 | 4.16263400  | -7.73798500  | C | 6.41860000 | 11.31590000 | -8.31120000  |
| H | 17.39139200 | 4.23054700  | -6.81052600  | C | 6.92260000 | 14.05300000 | -5.62240000  |
| H | 17.34625800 | 4.72312500  | -8.51733100  | C | 5.91800000 | 15.05000000 | -5.01270000  |
| O | 13.96263200 | 7.40759200  | -9.11255800  | H | 5.45560000 | 15.68430000 | -5.77780000  |
| N | 14.53857300 | 9.49117900  | -6.64048900  | H | 6.44060000 | 15.70820000 | -4.30860000  |
| C | 14.47366400 | 8.44736000  | -9.75385100  | H | 5.11900000 | 14.54340000 | -4.45860000  |
| C | 15.10041100 | 8.32792900  | -11.03299100 | C | 8.03970000 | 14.87600000 | -6.30760000  |
| C | 15.64083500 | 9.47569700  | -11.62521300 | H | 8.79660000 | 14.21740000 | -6.73640000  |
| H | 16.12783500 | 9.37041900  | -12.58468100 | H | 8.52390000 | 15.54360000 | -5.58280000  |
| C | 15.57870900 | 10.75522300 | -11.05476600 | H | 7.61890000 | 15.49640000 | -7.10840000  |
| C | 14.92661700 | 10.85588300 | -9.82139000  | C | 7.52830000 | 13.23260000 | -4.46240000  |
| H | 14.83264500 | 11.82741200 | -9.33874700  | H | 6.75460000 | 12.64300000 | -3.95450000  |
| C | 14.39682500 | 9.74474900  | -9.16633100  | H | 7.99920000 | 13.89060000 | -3.72020000  |
| C | 15.20062600 | 6.95445600  | -11.72418600 | H | 8.28540000 | 12.55540000 | -4.85660000  |
| C | 15.82766300 | 7.03991400  | -13.12978200 | C | 2.73930000 | 12.38740000 | -8.11630000  |
| H | 16.85874000 | 7.41153300  | -13.10076200 | C | 2.09470000 | 11.01360000 | -7.81780000  |
| H | 15.85244200 | 6.03998500  | -13.57899300 | H | 2.54560000 | 10.21280000 | -8.41360000  |
| H | 15.24802500 | 7.68885800  | -13.79680100 | H | 1.02000000 | 11.03240000 | -8.04080000  |
| C | 16.09134300 | 6.02248000  | -10.87187900 | H | 2.21830000 | 10.75070000 | -6.76110000  |
| H | 15.68428800 | 5.91211400  | -9.86688000  | C | 2.51090000 | 12.73840000 | -9.60560000  |
| H | 16.16592100 | 5.03130200  | -11.34001800 | H | 2.95880000 | 13.70910000 | -9.84740000  |
| H | 17.10510800 | 6.43099200  | -10.78667900 | H | 1.43830000 | 12.78820000 | -9.83350000  |
| C | 13.79465100 | 6.32737200  | -11.88428800 | H | 2.95860000 | 11.98980000 | -10.26840000 |
| H | 13.15716400 | 6.96176000  | -12.51248900 | C | 2.02160000 | 13.44680000 | -7.26020000  |
| H | 13.86481200 | 5.34354900  | -12.36690900 | H | 2.12910000 | 13.24050000 | -6.18900000  |
| H | 13.31351000 | 6.20921700  | -10.91381300 | H | 0.95010000 | 13.45170000 | -7.49230000  |
| C | 16.18330700 | 12.00535700 | -11.71396900 | H | 2.40830000 | 14.45380000 | -7.45380000  |
| C | 15.07132700 | 13.04830800 | -11.97290700 | C | 7.26630000 | 10.39820000 | -9.17110000  |
| H | 14.57302900 | 13.34627000 | -11.04416600 | H | 7.69580000 | 11.01430000 | -9.96680000  |
| H | 15.48659700 | 13.95337300 | -12.43480500 | H | 8.12560000 | 10.00630000 | -8.60560000  |
| H | 14.30770100 | 12.63991000 | -12.64484900 | C | 6.27430000 | 8.23660000  | -8.84430000  |
| C | 17.24691300 | 12.61919500 | -10.77312200 | H | 6.05310000 | 8.72290000  | -7.88910000  |
| H | 18.05134400 | 11.90027900 | -10.57783100 | H | 7.18620000 | 7.63910000  | -8.66730000  |
| H | 17.69141600 | 13.51790200 | -11.21998800 | C | 5.11570000 | 7.33010000  | -9.19960000  |
| H | 16.81508700 | 12.90528400 | -9.80798300  | C | 3.98240000 | 7.81940000  | -9.86170000  |
| C | 16.86424700 | 11.69069100 | -13.05882100 | H | 3.97680000 | 8.85190000  | -10.19520000 |
| H | 16.15477300 | 11.27857400 | -13.78542000 | C | 2.88650000 | 6.99050000  | -10.10490000 |
| H | 17.28408900 | 12.60822900 | -13.48743700 | H | 2.01550000 | 7.38700000  | -10.62070000 |
| H | 17.68483200 | 10.97400000 | -12.93891200 | C | 2.90590000 | 5.65740000  | -9.68860000  |
| C | 13.72983400 | 9.91769300  | -7.82439800  | H | 2.05180000 | 5.01230000  | -9.87690000  |
| H | 12.81021600 | 9.32738600  | -7.79010800  | C | 4.03520000 | 5.15640000  | -9.03770000  |
| C | 15.91796400 | 10.05891800 | -6.65814700  | H | 4.06670000 | 4.11670000  | -8.72200000  |
| H | 15.98589800 | 10.88020600 | -7.37890900  | C | 5.13260000 | 5.98690000  | -8.80260000  |
| H | 16.13912000 | 10.48104400 | -5.67514900  | H | 6.01670000 | 5.59040000  | -8.30670000  |
| C | 16.96286300 | 9.00433000  | -6.96976200  | C | 7.16200000 | 8.81280000  | -11.02420000 |
| C | 17.50425900 | 8.86202000  | -8.25408900  | H | 6.53000000 | 8.00450000  | -11.41520000 |
| H | 17.18251800 | 9.52516000  | -9.05096000  | H | 8.14950000 | 8.36460000  | -10.80630000 |
| C | 18.44412500 | 7.86274400  | -8.51800100  | C | 7.31610000 | 9.89580000  | -12.07790000 |
| H | 18.85467700 | 7.76678000  | -9.51940500  | C | 6.34870000 | 10.90020000 | -12.23070000 |

|   |             |             |              |   |             |             |              |
|---|-------------|-------------|--------------|---|-------------|-------------|--------------|
| C | 18.85117500 | 6.99085000  | -7.50689300  | H | 5.47760000  | 10.89140000 | -11.58340000 |
| H | 19.58362100 | 6.21537700  | -7.71577400  | C | 6.52350000  | 11.92150000 | -13.16360000 |
| C | 18.31398000 | 7.12159900  | -6.22302400  | H | 5.76670000  | 12.69590000 | -13.25960000 |
| H | 18.63146400 | 6.45323100  | -5.42633100  | C | 7.66690000  | 11.95800000 | -13.96780000 |
| C | 17.37836800 | 8.12337500  | -5.95623300  | H | 7.80260000  | 12.75720000 | -14.69160000 |
| H | 16.96699000 | 8.23013000  | -4.95473700  | C | 8.62820000  | 10.95480000 | -13.83810000 |
| H | 13.44945200 | 10.98061400 | -7.70456800  | H | 9.51640000  | 10.96160000 | -14.46510000 |
| C | 13.79274600 | 9.87385800  | -5.41635500  | C | 8.45100000  | 9.93140000  | -12.90040000 |
| H | 12.78220800 | 9.46353600  | -5.52536400  | H | 9.19810000  | 9.14710000  | -12.81610000 |
| H | 13.68717300 | 10.97304700 | -5.35162400  | C | 5.39660000  | 9.80530000  | -5.08280000  |
| C | 14.40891100 | 9.34447600  | -4.14036100  | H | 5.43350000  | 10.78730000 | -5.55580000  |
| C | 14.26012300 | 7.99327200  | -3.80109400  | H | 5.29050000  | 9.92640000  | -3.99330000  |
| H | 13.66284100 | 7.35106100  | -4.43948200  | C | 4.32780000  | 8.87530000  | -5.65010000  |
| C | 14.87142600 | 7.47421200  | -2.66018200  | H | 3.34860000  | 9.03100000  | -5.18790000  |
| H | 14.74197700 | 6.42392500  | -2.41223200  | H | 4.22180000  | 9.04730000  | -6.72430000  |
| C | 15.63652400 | 8.30282700  | -1.83399800  | C | 4.90700000  | 7.47310000  | -5.36620000  |
| H | 16.11272000 | 7.89951700  | -0.94424500  | H | 4.52440000  | 7.07950000  | -4.41870000  |
| C | 15.77263200 | 9.65537300  | -2.15040600  | H | 4.65070000  | 6.76040000  | -6.15440000  |
| H | 16.35500400 | 10.31055500 | -1.50795800  | C | 6.43310000  | 7.70930000  | -5.27440000  |
| C | 15.15813700 | 10.17090100 | -3.29458100  | H | 6.84440000  | 7.35220000  | -4.32070000  |
| H | 15.26490700 | 11.22680200 | -3.53410000  | H | 6.99850000  | 7.25450000  | -6.09190000  |
| C | 13.35457700 | 4.76640600  | -4.95017100  | H | 9.66780000  | 8.27020000  | -8.05060000  |
| H | 14.41968900 | 4.51544900  | -4.99377500  | O | 9.27180000  | 8.02380000  | -7.14800000  |
| H | 12.76698800 | 3.86199500  | -5.15052800  | C | 10.08030000 | 6.99670000  | -6.57970000  |
| H | 13.10593500 | 5.10866200  | -3.93546300  | H | 9.63800000  | 6.71240000  | -5.61880000  |
| O | 13.10952000 | 5.77582100  | -5.92146100  | H | 10.11220000 | 6.11250000  | -7.22850000  |
| H | 12.11237300 | 5.95517500  | -5.96590000  | H | 11.11030000 | 7.33730000  | -6.40650000  |
| C | 11.14713500 | 8.77436900  | -10.17227300 | H | 9.12920000  | 12.43240000 | -8.44880000  |
| H | 10.08193300 | 9.02496400  | -10.12897200 | H | 7.68680000  | 13.36530000 | -10.09380000 |
| H | 11.73435900 | 9.67892000  | -9.97147500  | O | 9.52510000  | 12.67920000 | -9.35120000  |
| H | 11.39627400 | 8.43245000  | -11.18697000 | H | 9.15960000  | 13.99250000 | -10.87900000 |
| O | 11.39213900 | 7.76479200  | -9.20113800  | H | 8.68300000  | 14.58960000 | -9.26900000  |
| H | 12.38916300 | 7.58500300  | -9.15692300  | C | 8.71640000  | 13.70640000 | -9.91900000  |

**INT2**

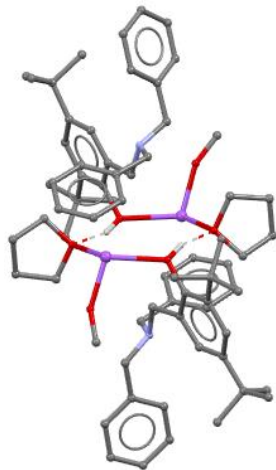

**3**

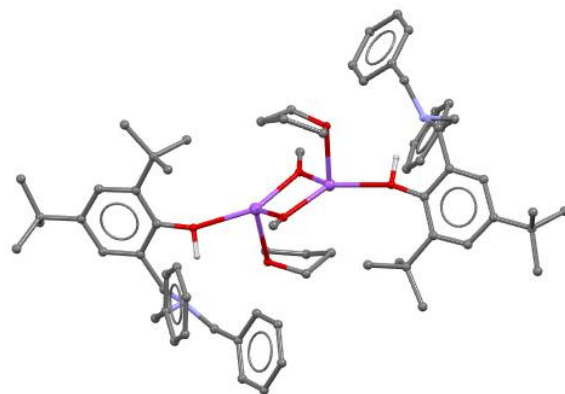

|    |             |             |             |
|----|-------------|-------------|-------------|
| Na | 10.36264900 | 11.24024000 | 11.43206100 |
| O  | 11.03763800 | 9.17935800  | 10.53569000 |
| O  | 9.66834800  | 12.91400200 | 9.62343700  |
| N  | 13.70733300 | 11.63025400 | 8.35367800  |
| C  | 12.41856200 | 8.93116500  | 10.64416000 |
| C  | 12.91347000 | 7.94709700  | 11.51655900 |
| C  | 14.30612900 | 7.74986700  | 11.52074000 |
| H  | 14.71347000 | 7.00017600  | 12.18231900 |

|    |             |             |             |
|----|-------------|-------------|-------------|
| Na | 0.20227400  | 1.16731500  | -0.11920700 |
| O  | -1.03547200 | 0.46153800  | 1.76064100  |
| C  | -0.54740200 | 1.17468700  | 2.92317400  |
| H  | 0.17816000  | 1.92210700  | 2.58448200  |
| H  | -1.39128200 | 1.69146800  | 3.39680800  |
| C  | 0.10384600  | 0.12580200  | 3.83472700  |
| H  | -0.62024200 | -0.25324600 | 4.56645400  |
| H  | 0.96175200  | 0.53134500  | 4.37812200  |

|   |             |             |             |   |             |             |             |
|---|-------------|-------------|-------------|---|-------------|-------------|-------------|
| C | 15.18580400 | 8.47686800  | 10.71448800 | C | 0.48631800  | -0.97784200 | 2.83674100  |
| C | 14.63682600 | 9.44722900  | 9.87055500  | H | 0.62357600  | -1.95659000 | 3.30656300  |
| H | 15.27564300 | 10.05120300 | 9.24169500  | H | 1.40093400  | -0.70204800 | 2.30329500  |
| C | 13.26891900 | 9.69394000  | 9.83352200  | C | -0.69230100 | -0.94534500 | 1.86958100  |
| C | 12.00178100 | 7.15205100  | 12.47225000 | H | -1.56207300 | -1.49456100 | 2.25747400  |
| C | 12.76408700 | 6.04163300  | 13.22446400 | H | -0.45023500 | -1.29194700 | 0.86049100  |
| H | 13.20649800 | 5.31275500  | 12.53557400 | O | -1.15508600 | 3.02814400  | 0.01601400  |
| H | 12.06724600 | 5.50354500  | 13.87694700 | N | -3.69391900 | 2.33946300  | 0.43487000  |
| H | 13.56029300 | 6.44331000  | 13.85993800 | C | -1.54258400 | 4.34805000  | 0.07708900  |
| C | 10.84218600 | 6.46525800  | 11.71233800 | C | -0.74989500 | 5.37379500  | -0.47161100 |
| H | 10.18018700 | 7.19287000  | 11.24458600 | C | -1.25055000 | 6.68179100  | -0.36003200 |
| H | 10.24807200 | 5.85529400  | 12.40409900 | H | -0.65697700 | 7.48253700  | -0.77431400 |
| H | 11.22987600 | 5.80028700  | 10.93062700 | C | -2.47181400 | 7.00820000  | 0.23867400  |
| C | 11.44365000 | 8.13414600  | 13.52722700 | C | -3.22318500 | 5.95144600  | 0.76407200  |
| H | 12.25728600 | 8.55918500  | 14.12492800 | H | -4.18142800 | 6.14309100  | 1.24086600  |
| H | 10.74828000 | 7.62140500  | 14.20540400 | C | -2.77155700 | 4.63699100  | 0.70284800  |
| H | 10.91538700 | 8.96126000  | 13.05307500 | C | 0.60179100  | 5.09434000  | -1.15560800 |
| C | 16.71109600 | 8.29136900  | 10.75282000 | C | 1.25850800  | 6.38198600  | -1.69623200 |
| C | 17.35089400 | 9.57779100  | 11.32744000 | H | 0.63746500  | 6.87700300  | -2.45189700 |
| H | 17.11160900 | 10.45538400 | 10.72101600 | H | 2.21381300  | 6.12595200  | -2.16752400 |
| H | 18.44331100 | 9.47896300  | 11.36125800 | H | 1.47103100  | 7.10097800  | -0.89706200 |
| H | 16.99180300 | 9.76623100  | 12.34564200 | C | 0.40778700  | 4.14878600  | -2.36345900 |
| C | 17.24684200 | 8.05570900  | 9.32124200  | H | 0.02515700  | 3.17154300  | -2.06727800 |
| H | 16.78543700 | 7.16895700  | 8.87009400  | H | 1.36630600  | 3.99413500  | -2.87159200 |
| H | 18.33259400 | 7.90200400  | 9.34330600  | H | -0.29517700 | 4.57901600  | -3.08673800 |
| H | 17.05112900 | 8.91259800  | 8.66885500  | C | 1.58980700  | 4.46992300  | -0.14506700 |
| C | 17.13611000 | 7.09743600  | 11.62678100 | H | 1.76168200  | 5.15562800  | 0.69322300  |
| H | 16.84392000 | 7.23563400  | 12.67391300 | H | 2.55273100  | 4.27882800  | -0.63071000 |
| H | 18.22644300 | 6.99063000  | 11.60285700 | H | 1.24400000  | 3.51894200  | 0.26043500  |
| H | 16.69978000 | 6.15675300  | 11.26979300 | C | -3.00254600 | 8.44879200  | 0.32847900  |
| C | 12.68758400 | 10.74171600 | 8.90295600  | C | -3.20156100 | 8.83208600  | 1.81339200  |
| H | 12.19494500 | 10.22953200 | 8.06887000  | H | -3.91414500 | 8.16685700  | 2.31250900  |
| H | 11.90535600 | 11.30595700 | 9.42690700  | H | -3.58592100 | 9.85621200  | 1.89765600  |
| C | 14.18434200 | 12.60804500 | 9.34372300  | H | -2.25297500 | 8.77619300  | 2.35942000  |
| H | 13.76695600 | 12.33716100 | 10.32099500 | C | -4.35787200 | 8.54317500  | -0.41041600 |
| H | 13.76386900 | 13.60492300 | 9.12610200  | H | -4.24306400 | 8.27862700  | -1.46775900 |
| C | 15.69518200 | 12.71922200 | 9.43619200  | H | -4.75632600 | 9.56379200  | -0.35362500 |
| C | 16.55136900 | 12.24356500 | 8.43650600  | H | -5.10459400 | 7.86962300  | 0.02343300  |
| H | 16.12962700 | 11.75420100 | 7.56362600  | C | -2.04081300 | 9.47151800  | -0.30441600 |
| C | 17.93766800 | 12.36049400 | 8.56814500  | H | -1.06513500 | 9.47441200  | 0.19475900  |
| H | 18.58705500 | 11.97798900 | 7.78444000  | H | -2.46176600 | 10.47933400 | -0.21478600 |
| C | 18.48754300 | 12.95740000 | 9.70306900  | H | -1.88063300 | 9.27304800  | -1.37028700 |
| H | 19.56570600 | 13.04201200 | 9.81028900  | C | -3.56150200 | 3.51304600  | 1.33351300  |
| C | 17.64007400 | 13.43506200 | 10.70663300 | H | -3.03698200 | 3.15643600  | 2.22987200  |
| H | 18.05812400 | 13.88886900 | 11.60164100 | H | -4.54930400 | 3.87589100  | 1.66367500  |
| C | 16.25701300 | 13.31602500 | 10.57315800 | C | -4.55418700 | 2.65550500  | -0.73374000 |
| H | 15.59873100 | 13.66739500 | 11.36498500 | H | -4.39634300 | 3.71675400  | -0.95484200 |
| C | 13.34979500 | 12.22384000 | 7.07510800  | H | -5.61599900 | 2.53840700  | -0.46454600 |
| H | 14.16008700 | 12.91065300 | 6.79749700  | C | -4.23203700 | 1.84496700  | -1.97388800 |
| H | 12.43410100 | 12.84494100 | 7.13776400  | C | -2.93988200 | 1.86750500  | -2.51625600 |
| C | 13.16771000 | 11.19606000 | 5.97183600  | H | -2.17073300 | 2.47019400  | -2.04858300 |
| C | 13.87999500 | 9.98740800  | 5.97162600  | C | -2.62726800 | 1.10834400  | -3.64250900 |
| H | 14.57272700 | 9.78874500  | 6.78390300  | H | -1.61419900 | 1.12231600  | -4.03436700 |
| C | 13.66701200 | 9.03659100  | 4.97049000  | C | -3.60973900 | 0.32670400  | -4.25561400 |
| H | 14.21765400 | 8.09975900  | 4.99369400  | H | -3.36466700 | -0.27410500 | -5.12742600 |
| C | 12.74310700 | 9.27845400  | 3.94895300  | C | -4.90531900 | 0.31924200  | -3.73806100 |
| H | 12.56747500 | 8.53277000  | 3.17894900  | H | -5.67597000 | -0.28997900 | -4.20278600 |
| C | 12.04361200 | 10.48933800 | 3.92808500  | C | -5.21247800 | 1.07608900  | -2.60642100 |



|    |             |             |             |    |             |             |             |
|----|-------------|-------------|-------------|----|-------------|-------------|-------------|
| H  | 11.31923300 | 10.69043500 | 3.14351900  | H  | -6.21331300 | 1.03429900  | -2.18584200 |
| C  | 12.25841800 | 11.43867700 | 4.93317400  | C  | -4.16264900 | 1.17944600  | 1.23498400  |
| H  | 11.70122100 | 12.37035600 | 4.92179900  | H  | -5.05107300 | 1.48036400  | 1.81731400  |
| C  | 10.73618000 | 13.92069000 | 9.72974200  | H  | -3.35581200 | 0.95131400  | 1.93756200  |
| H  | 11.03147200 | 14.20813300 | 8.71463100  | C  | -4.50061500 | -0.05951900 | 0.44035800  |
| H  | 11.54380800 | 13.42578600 | 10.27853900 | C  | -3.51289300 | -0.77155700 | -0.25455600 |
| C  | 10.13484300 | 15.10113800 | 10.52153800 | H  | -2.48592800 | -0.42367800 | -0.24597000 |
| H  | 10.74054600 | 15.33014000 | 11.40155100 | C  | -3.85071500 | -1.90632200 | -0.98875300 |
| H  | 10.07972500 | 16.00134100 | 9.90012900  | H  | -3.07712800 | -2.43593400 | -1.53359200 |
| C  | 8.71930800  | 14.61905300 | 10.90425200 | C  | -5.17472300 | -2.35209100 | -1.03208600 |
| H  | 8.73316600  | 14.10968900 | 11.87428300 | H  | -5.43269600 | -3.23667500 | -1.60868600 |
| H  | 7.98525500  | 15.42960700 | 10.95127200 | C  | -6.16177800 | -1.65812000 | -0.33361600 |
| C  | 8.41129900  | 13.61260900 | 9.80569900  | H  | -7.19394100 | -1.99845500 | -0.35798900 |
| H  | 7.65725800  | 12.86656800 | 10.05338500 | C  | -5.82167000 | -0.51789100 | 0.39747200  |
| H  | 8.12448600  | 14.10239800 | 8.86638000  | H  | -6.59383000 | 0.02699100  | 0.93677600  |
| Na | 10.22791600 | 9.60669900  | 6.37109200  | O  | 0.30227200  | -0.66213300 | -1.28038400 |
| O  | 9.35929400  | 11.60293800 | 7.20799600  | C  | -0.42107100 | -1.57979200 | -2.01425400 |
| O  | 10.85540000 | 7.89800200  | 8.08859300  | H  | -0.78158800 | -2.44129600 | -1.40618100 |
| N  | 6.59838200  | 9.20343400  | 9.37735800  | H  | -1.32430100 | -1.14758400 | -2.49169300 |
| C  | 7.98607800  | 11.89393600 | 7.10578900  | H  | 0.15868700  | -2.04208200 | -2.84820700 |
| C  | 7.52231600  | 12.92758900 | 6.27449700  | H  | -2.00489600 | 2.49001300  | 0.13332500  |
| C  | 6.14380500  | 13.20650400 | 6.31960500  | Na | 2.41899100  | -0.60529800 | -0.69429600 |
| H  | 5.76278300  | 14.00163800 | 5.69642100  | O  | 3.23868000  | 0.07792700  | -2.82309300 |
| C  | 5.24792700  | 12.50615200 | 7.13164000  | C  | 2.78614100  | -0.82872100 | -3.85576800 |
| C  | 5.75867700  | 11.45643000 | 7.90150400  | H  | 2.29947900  | -1.67855800 | -3.36561400 |
| H  | 5.10240100  | 10.86066100 | 8.52290900  | H  | 3.65856800  | -1.19583700 | -4.41136700 |
| C  | 7.10982200  | 11.12817200 | 7.88743800  | C  | 1.80643000  | -0.04020800 | -4.74048500 |
| C  | 8.45077700  | 13.68233200 | 5.30227700  | H  | 2.31435300  | 0.33682300  | -5.63629700 |
| C  | 7.72052900  | 14.81260500 | 4.54845900  | H  | 0.96139600  | -0.65607800 | -5.06100400 |
| H  | 7.32512200  | 15.57124900 | 5.23382200  | C  | 1.38466300  | 1.12101900  | -3.82571000 |
| H  | 8.42529100  | 15.31031300 | 3.87286000  | H  | 1.02714000  | 1.99574500  | -4.37639900 |
| H  | 6.89405900  | 14.43458000 | 3.93745900  | H  | 0.61807700  | 0.77693600  | -3.12467000 |
| C  | 9.64422000  | 14.33132400 | 6.04112200  | C  | 2.67184500  | 1.38948100  | -3.05079500 |
| H  | 10.27240000 | 13.58359600 | 6.52318600  | H  | 3.38512400  | 1.99755500  | -3.62729100 |
| H  | 10.26397700 | 14.89582800 | 5.33328900  | H  | 2.53298900  | 1.85162900  | -2.06974900 |
| H  | 9.29286300  | 15.03254500 | 6.80793700  | O  | 4.39791800  | -1.71623000 | -0.37218900 |
| C  | 8.95831700  | 12.67048400 | 4.24807200  | N  | 6.50142800  | -0.58658300 | -1.54560800 |
| H  | 8.12033800  | 12.26887300 | 3.66817800  | C  | 5.09403200  | -2.90207400 | -0.39122900 |
| H  | 9.65684600  | 13.15485300 | 3.55263200  | C  | 4.77736600  | -3.94328400 | 0.50039500  |
| H  | 9.46673300  | 11.82813800 | 4.71829600  | C  | 5.55723600  | -5.10817200 | 0.40671900  |
| C  | 3.74482800  | 12.81943800 | 7.19865600  | H  | 5.33072300  | -5.92082000 | 1.08061300  |
| C  | 2.94116200  | 11.56889500 | 6.76902500  | C  | 6.61832100  | -5.26967100 | -0.49115000 |
| H  | 3.13110800  | 10.71459600 | 7.42687600  | C  | 6.89964500  | -4.19759700 | -1.34705400 |
| H  | 1.86482000  | 11.77931200 | 6.79862000  | H  | 7.71687500  | -4.26566000 | -2.06106400 |
| H  | 3.20441400  | 11.27094600 | 5.74790300  | C  | 6.14832700  | -3.02735200 | -1.31742600 |
| C  | 3.36901700  | 13.19016400 | 8.65276600  | C  | 3.63309200  | -3.81783300 | 1.52634500  |
| H  | 3.92806300  | 14.07205700 | 8.98770600  | C  | 3.55141300  | -5.04590300 | 2.45669100  |
| H  | 2.29804400  | 13.41573400 | 8.72671300  | H  | 4.47216800  | -5.18078200 | 3.03575500  |
| H  | 3.58471200  | 12.37010700 | 9.34603700  | H  | 2.72986800  | -4.90503100 | 3.16788900  |
| C  | 3.34584600  | 13.99099200 | 6.28344700  | H  | 3.35063000  | -5.97121400 | 1.90511200  |
| H  | 3.55927300  | 13.77275400 | 5.23084500  | C  | 3.84583200  | -2.57824400 | 2.43085400  |
| H  | 2.27002100  | 14.18011900 | 6.37056700  | H  | 3.81861600  | -1.64319100 | 1.87098600  |
| H  | 3.86840400  | 14.91566500 | 6.55527300  | H  | 3.06354100  | -2.53723500 | 3.19706700  |
| C  | 7.64581500  | 9.93716300  | 8.65769100  | H  | 4.81382500  | -2.64364500 | 2.94245500  |
| H  | 8.39793100  | 10.27275400 | 9.38072900  | C  | 2.27944700  | -3.72003400 | 0.78343000  |
| H  | 8.14795500  | 9.28586300  | 7.92236800  | H  | 2.08270700  | -4.63882300 | 0.21879600  |
| C  | 5.92561200  | 8.23320700  | 8.51309800  | H  | 1.45882400  | -3.57433800 | 1.49555400  |
| H  | 5.85653100  | 8.67869700  | 7.51583800  | H  | 2.25226700  | -2.89150200 | 0.07435600  |

|   |             |             |             |   |            |             |             |
|---|-------------|-------------|-------------|---|------------|-------------|-------------|
| H | 6.52997100  | 7.31734700  | 8.38053800  | C | 7.46981700 | -6.54871400 | -0.55858200 |
| C | 4.52571100  | 7.86544300  | 8.96945000  | C | 7.36695400 | -7.16074000 | -1.97507400 |
| C | 3.78234000  | 8.68305400  | 9.82980000  | H | 7.72072300 | -6.46619800 | -2.74437700 |
| H | 4.24500300  | 9.57532800  | 10.23914800 | H | 7.97330600 | -8.07239000 | -2.04449900 |
| C | 2.46983900  | 8.35033900  | 10.17368300 | H | 6.32888600 | -7.42103600 | -2.21131800 |
| H | 1.90998800  | 8.99646800  | 10.84529100 | C | 8.94601900 | -6.19889200 | -0.25790800 |
| C | 1.87995700  | 7.19474400  | 9.66094900  | H | 9.04605000 | -5.76427400 | 0.74319500  |
| H | 0.85872600  | 6.93557400  | 9.92737300  | H | 9.57135600 | -7.09906800 | -0.30495100 |
| C | 2.61551800  | 6.36948300  | 8.80611300  | H | 9.34713900 | -5.47705100 | -0.97725800 |
| H | 2.16776600  | 5.46397200  | 8.40455300  | C | 7.01509800 | -7.61388100 | 0.45633100  |
| C | 3.92718500  | 6.70138000  | 8.46925300  | H | 5.97945700 | -7.92649900 | 0.28054600  |
| H | 4.49551400  | 6.05569000  | 7.80270900  | H | 7.64910000 | -8.50327100 | 0.36754800  |
| C | 7.04831500  | 8.62906600  | 10.63471000 | H | 7.09457600 | -7.25242600 | 1.48790800  |
| H | 6.25124100  | 7.96797000  | 10.99803100 | C | 6.42193200 | -1.88120700 | -2.26610700 |
| H | 7.94363100  | 7.98836200  | 10.51031700 | H | 5.58997000 | -1.78939400 | -2.97513000 |
| C | 7.32980500  | 9.67504200  | 11.69841700 | H | 7.33314100 | -2.07430800 | -2.85602600 |
| C | 6.71763500  | 10.93560400 | 11.66773000 | C | 7.72314700 | -0.51108300 | -0.70110600 |
| H | 6.05000600  | 11.17091400 | 10.84513400 | H | 7.98967300 | -1.54089800 | -0.44149000 |
| C | 6.98427700  | 11.88215000 | 12.66090100 | H | 8.55812800 | -0.10004700 | -1.29019100 |
| H | 6.50564600  | 12.85679100 | 12.61590300 | C | 7.53563200 | 0.27767900  | 0.57818400  |
| C | 7.86812400  | 11.58550100 | 13.70259400 | C | 6.65976800 | -0.19826100 | 1.56177800  |
| H | 8.08322800  | 12.32439300 | 14.46927600 | H | 6.13394500 | -1.13341800 | 1.40608400  |
| C | 8.47540000  | 10.32538400 | 13.74870700 | C | 6.44595400 | 0.52484600  | 2.73357500  |
| H | 9.16721300  | 10.08063500 | 14.55007700 | H | 5.74836200 | 0.14873200  | 3.47708500  |
| C | 8.20487600  | 9.38089000  | 12.75325000 | C | 7.11873600 | 1.73112200  | 2.94408900  |
| H | 8.68694800  | 8.40864800  | 12.78814400 | H | 6.94537600 | 2.30171600  | 3.85263000  |
| C | 9.79399900  | 6.86991000  | 8.00354400  | C | 8.01151800 | 2.20036500  | 1.97962300  |
| H | 9.39499400  | 6.71896300  | 9.01230600  | H | 8.53584500 | 3.14006400  | 2.13119600  |
| H | 9.04045100  | 7.28525100  | 7.32017500  | C | 8.22044800 | 1.47402800  | 0.80659600  |
| C | 10.46980000 | 5.60611100  | 7.44363500  | H | 8.89020800 | 1.86125500  | 0.04409600  |
| H | 9.85888600  | 5.14092900  | 6.66519300  | C | 6.37481000 | 0.54008800  | -2.49551200 |
| H | 10.64079200 | 4.86482200  | 8.23306200  | H | 7.21991000 | 0.52471800  | -3.20672600 |
| C | 11.81654000 | 6.12311700  | 6.90687900  | H | 5.45400000 | 0.36187500  | -3.05751400 |
| H | 11.69797600 | 6.54452400  | 5.90162500  | C | 6.29413800 | 1.89853500  | -1.83673300 |
| H | 12.59376300 | 5.35320800  | 6.87391700  | C | 5.29544400 | 2.18658900  | -0.89580900 |
| C | 12.13213200 | 7.23346800  | 7.89654900  | H | 4.55543100 | 1.44209500  | -0.61979800 |
| H | 12.84303000 | 7.98040500  | 7.54157900  | C | 5.25127900 | 3.43522400  | -0.27856300 |
| H | 12.48866700 | 6.83864300  | 8.85583800  | H | 4.49397400 | 3.62652300  | 0.47356600  |
| H | 10.77294200 | 8.80468200  | 9.65943700  | C | 6.18442300 | 4.42175700  | -0.60993000 |
| O | 8.53714600  | 8.51614700  | 5.88890300  | H | 6.14632100 | 5.39318300  | -0.12367300 |
| C | 7.33838200  | 8.54479400  | 5.21707700  | C | 7.16508500 | 4.15260200  | -1.56427500 |
| H | 6.68426300  | 7.66706200  | 5.43617100  | H | 7.89426200 | 4.91329400  | -1.83174400 |
| H | 7.44023600  | 8.54940900  | 4.10738300  | C | 7.21887000 | 2.89435000  | -2.16841300 |
| H | 6.71422200  | 9.43990000  | 5.45435000  | H | 7.99683700 | 2.67915100  | -2.89832600 |
| H | 9.64815600  | 11.99887800 | 8.06766600  | O | 2.27000100 | 1.11742600  | 0.60199100  |
| H | 12.27832700 | 13.51917700 | 13.55111200 | C | 2.92813600 | 1.62660300  | 1.70286300  |
| O | 12.08503600 | 12.30305200 | 11.85739800 | H | 4.03109100 | 1.54536100  | 1.63795500  |
| H | 13.79185400 | 12.84185300 | 12.93285500 | H | 2.65940800 | 1.11718700  | 2.65840000  |
| H | 12.99969800 | 14.16834000 | 12.06849100 | H | 2.71952400 | 2.70664600  | 1.88373900  |
| C | 12.78996400 | 13.20795500 | 12.60981000 | H | 5.04610800 | -1.01895800 | -0.71535400 |

**Table S9.** DFT optimized structures and atom coordinates of complexes for proposed mechanism of the reaction between  $[(\text{d-}t\text{bL}^{\text{Bn}})\text{Na}(\text{THF})_2]$  and methanol.

**A**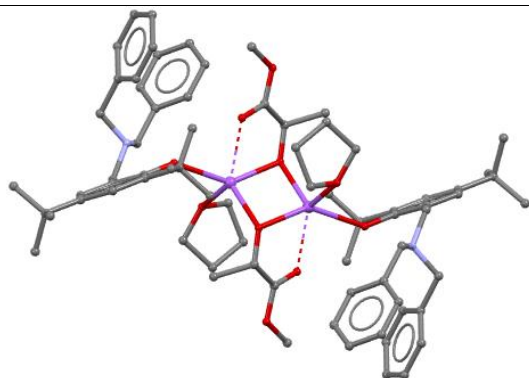**B**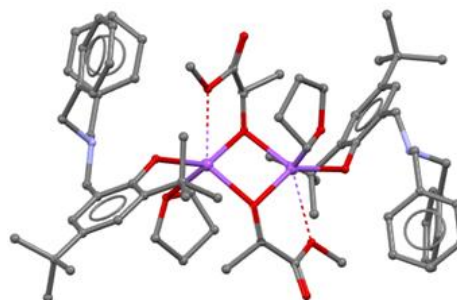

|    |             |             |             |
|----|-------------|-------------|-------------|
| Na | 0.20416100  | 1.30712700  | -0.28320100 |
| O  | -0.59951500 | 0.70808400  | 1.94573900  |
| C  | -0.51199100 | 1.41397600  | 3.18785200  |
| H  | -0.49546000 | 2.48346000  | 2.96502500  |
| H  | -1.40614300 | 1.19494500  | 3.79435200  |
| C  | 0.76406400  | 0.89420600  | 3.87434700  |
| H  | 0.63184600  | 0.82670500  | 4.95887300  |
| H  | 1.60532800  | 1.56683200  | 3.68456800  |
| C  | 1.00013900  | -0.48780500 | 3.20592600  |
| H  | 1.04173400  | -1.30476600 | 3.93299100  |
| H  | 1.94057800  | -0.48256200 | 2.65235100  |
| C  | -0.18560600 | -0.64701400 | 2.24063500  |
| H  | -1.02776800 | -1.17616800 | 2.71384900  |
| H  | 0.08145500  | -1.10666100 | 1.28545600  |
| O  | -1.56950700 | 2.82751000  | -0.78524100 |
| N  | -3.81314400 | 1.99450400  | 0.46340000  |
| C  | -2.02078300 | 4.10988800  | -0.57196100 |
| C  | -1.60679800 | 5.17417400  | -1.39527000 |
| C  | -2.12849800 | 6.44249400  | -1.08552700 |
| H  | -1.81817100 | 7.27563700  | -1.69779600 |
| C  | -3.03743600 | 6.68765700  | -0.05088500 |
| C  | -3.44346200 | 5.58841600  | 0.71532000  |
| H  | -4.16089500 | 5.71600400  | 1.52249500  |
| C  | -2.94252800 | 4.31332800  | 0.47490400  |
| C  | -0.63107900 | 4.97826200  | -2.57445000 |
| C  | -0.48118100 | 6.26347700  | -3.41599400 |
| H  | -1.43979400 | 6.59668800  | -3.83114800 |
| H  | 0.19370100  | 6.06445300  | -4.25595900 |
| H  | -0.04712100 | 7.08916800  | -2.84077200 |
| C  | -1.13474000 | 3.86917900  | -3.53099200 |
| H  | -1.21547900 | 2.90003400  | -3.03989900 |
| H  | -0.43804700 | 3.76816700  | -4.37240500 |
| H  | -2.11572000 | 4.13894900  | -3.94266000 |
| C  | 0.76884300  | 4.61657300  | -2.03185100 |
| H  | 1.15615000  | 5.42920300  | -1.40534600 |
| H  | 1.46980800  | 4.47602200  | -2.86389100 |
| H  | 0.78300200  | 3.70520800  | -1.43310000 |
| C  | -3.60172200 | 8.08554600  | 0.25361600  |
| C  | -3.23714300 | 8.48091900  | 1.70354500  |
| H  | -3.64636000 | 7.77320500  | 2.43229400  |
| H  | -3.63581300 | 9.47468800  | 1.94286800  |
| H  | -2.14966900 | 8.50657600  | 1.83700000  |
| C  | -5.14052300 | 8.06349500  | 0.10033200  |
| H  | -5.42497000 | 7.78736600  | -0.92146100 |

|    |             |             |             |
|----|-------------|-------------|-------------|
| Na | 0.22000500  | 1.28311500  | -0.12322500 |
| O  | -0.74053300 | 0.82564000  | 2.11594600  |
| C  | -0.73524400 | 1.77571600  | 3.20517500  |
| H  | -0.61286900 | 2.77012900  | 2.76717900  |
| H  | -1.70208100 | 1.73657200  | 3.72573300  |
| C  | 0.43060700  | 1.38088000  | 4.13998300  |
| H  | 0.04382600  | 0.94886200  | 5.06985800  |
| H  | 1.05490100  | 2.23818200  | 4.40717800  |
| C  | 1.18807800  | 0.31672600  | 3.32572500  |
| H  | 1.72353100  | -0.40105200 | 3.95219500  |
| H  | 1.90123000  | 0.79114400  | 2.64282900  |
| C  | 0.06018400  | -0.31436300 | 2.51617800  |
| H  | -0.55011600 | -0.99368400 | 3.13281900  |
| H  | 0.38321000  | -0.81157200 | 1.59768600  |
| O  | -1.59830100 | 2.70396700  | -0.90565200 |
| N  | -3.80097600 | 1.51104500  | 0.12630900  |
| C  | -2.15771000 | 3.92058900  | -0.56329300 |
| C  | -1.74181200 | 5.12309700  | -1.17098400 |
| C  | -2.39835100 | 6.29551600  | -0.75679900 |
| H  | -2.09014200 | 7.22668000  | -1.20653900 |
| C  | -3.43253600 | 6.33103400  | 0.18293400  |
| C  | -3.81756000 | 5.10961000  | 0.74507300  |
| H  | -4.61802600 | 5.07184400  | 1.47989300  |
| C  | -3.18934700 | 3.91765000  | 0.39781100  |
| C  | -0.63608100 | 5.18383400  | -2.24546900 |
| C  | -0.44626400 | 6.60856800  | -2.80807000 |
| H  | -1.35957700 | 6.99277000  | -3.27723100 |
| H  | 0.33533000  | 6.58693800  | -3.57565200 |
| H  | -0.12579200 | 7.31913300  | -2.03795800 |
| C  | -1.00625900 | 4.27411900  | -3.43683500 |
| H  | -1.10942200 | 3.23490000  | -3.13246200 |
| H  | -0.23149400 | 4.33347500  | -4.21048000 |
| H  | -1.95279200 | 4.59679200  | -3.88393200 |
| C  | 0.71515200  | 4.75171000  | -1.63854300 |
| H  | 1.00516900  | 5.43093600  | -0.82988600 |
| H  | 1.50072600  | 4.79205900  | -2.40295100 |
| H  | 0.70252600  | 3.74027300  | -1.23102000 |
| C  | -4.14432900 | 7.62889900  | 0.59854900  |
| C  | -3.97054500 | 7.84498800  | 2.11993300  |
| H  | -4.39218800 | 7.01628900  | 2.69862800  |
| H  | -4.47678700 | 8.76506700  | 2.43723500  |
| H  | -2.90970000 | 7.92992500  | 2.38139300  |
| C  | -5.65046700 | 7.51632400  | 0.26574700  |
| H  | -5.80068800 | 7.36449500  | -0.80929600 |

|    |             |             |             |    |             |             |             |
|----|-------------|-------------|-------------|----|-------------|-------------|-------------|
| H  | -5.56285700 | 9.05234200  | 0.31836900  | H  | -6.17823500 | 8.43212800  | 0.55935200  |
| H  | -5.60649600 | 7.34478700  | 0.78283800  | H  | -6.12102700 | 6.67824900  | 0.79086100  |
| C  | -3.04307000 | 9.16573000  | -0.69108900 | C  | -3.58470800 | 8.86612000  | -0.12765100 |
| H  | -1.95322300 | 9.24961800  | -0.61210700 | H  | -2.52136800 | 9.01799400  | 0.08968300  |
| H  | -3.47051700 | 10.14086300 | -0.43140400 | H  | -4.12157300 | 9.76256900  | 0.20240900  |
| H  | -3.29667900 | 8.96101400  | -1.73744900 | H  | -3.70570500 | 8.78902900  | -1.21422900 |
| C  | -3.36386200 | 3.12673000  | 1.31077100  | C  | -3.57459400 | 2.62531100  | 1.07817500  |
| H  | -2.50521100 | 2.76007100  | 1.88221600  | H  | -2.75580800 | 2.30527500  | 1.72651200  |
| H  | -4.13908400 | 3.42077900  | 2.03799700  | H  | -4.45599300 | 2.78459700  | 1.72202400  |
| C  | -5.09947500 | 2.29480900  | -0.21894000 | C  | -5.01768600 | 1.73700200  | -0.71290800 |
| H  | -5.20335100 | 3.38443100  | -0.24014300 | H  | -5.37870200 | 2.75070400  | -0.51178700 |
| H  | -5.93885600 | 1.90246100  | 0.37524300  | H  | -5.80950200 | 1.04694300  | -0.39685000 |
| C  | -5.17337800 | 1.78173200  | -1.64324400 | C  | -4.77481900 | 1.59897500  | -2.20443100 |
| C  | -4.36830100 | 2.36710500  | -2.62872300 | C  | -4.32577400 | 2.70178500  | -2.94388600 |
| H  | -3.70577500 | 3.18453000  | -2.36510200 | H  | -4.14567100 | 3.64807900  | -2.44052800 |
| C  | -4.41523400 | 1.91499900  | -3.94615700 | C  | -4.10250200 | 2.59552700  | -4.31753900 |
| H  | -3.77850000 | 2.37875800  | -4.69502800 | H  | -3.75654200 | 3.46035700  | -4.87614000 |
| C  | -5.27498400 | 0.87044700  | -4.29856200 | C  | -4.32413500 | 1.38283000  | -4.97304700 |
| H  | -5.31118600 | 0.51470700  | -5.32522900 | H  | -4.14865600 | 1.29918700  | -6.04231700 |
| C  | -6.08759900 | 0.28797600  | -3.32452800 | C  | -4.77843200 | 0.28090100  | -4.24588400 |
| H  | -6.75528800 | -0.52860200 | -3.58591800 | H  | -4.95623100 | -0.66830600 | -4.74440700 |
| C  | -6.03907700 | 0.74648500  | -2.00729400 | C  | -5.00559500 | 0.39032500  | -2.87367300 |
| H  | -6.65439100 | 0.27193100  | -1.24874400 | H  | -5.35916400 | -0.47288200 | -2.32054600 |
| C  | -3.85387300 | 0.74619000  | 1.25413700  | C  | -3.84614900 | 0.23650000  | 0.88851500  |
| H  | -4.59685700 | 0.83684900  | 2.06714100  | H  | -4.68332100 | 0.26427500  | 1.60860200  |
| H  | -2.86542200 | 0.63737300  | 1.71097800  | H  | -2.91467200 | 0.18830000  | 1.46139900  |
| C  | -4.15144800 | -0.48421900 | 0.42918100  | C  | -3.96796800 | -0.98754000 | 0.01503000  |
| C  | -3.30598700 | -0.83957300 | -0.62918000 | C  | -2.90380900 | -1.34899900 | -0.81805200 |
| H  | -2.45407900 | -0.21214900 | -0.86414100 | H  | -1.99753900 | -0.75672700 | -0.80908100 |
| C  | -3.57306200 | -1.96555800 | -1.40496000 | C  | -3.00761000 | -2.44243200 | -1.67558000 |
| H  | -2.90976000 | -2.22315600 | -2.22509000 | H  | -2.17650700 | -2.69870000 | -2.32725400 |
| C  | -4.68993500 | -2.75894400 | -1.12490900 | C  | -4.18106600 | -3.20278100 | -1.69635800 |
| H  | -4.89983500 | -3.63688400 | -1.73019300 | H  | -4.26592800 | -4.05605800 | -2.36390200 |
| C  | -5.53001800 | -2.42233300 | -0.06360300 | C  | -5.23924600 | -2.86791300 | -0.84956500 |
| H  | -6.39778900 | -3.03653200 | 0.16308700  | H  | -6.15026500 | -3.46062700 | -0.85345100 |
| C  | -5.25934900 | -1.28918700 | 0.70852700  | C  | -5.13160900 | -1.76336200 | 0.00092600  |
| H  | -5.92126800 | -1.02316200 | 1.53012600  | H  | -5.96260500 | -1.49702500 | 0.65066100  |
| H  | -2.33301400 | 2.23355900  | -0.51864400 | H  | -2.31007400 | 2.02002600  | -0.70581000 |
| Na | 2.91517000  | 0.03309100  | -0.42364400 | Na | 3.10152000  | 0.31732200  | -0.20436500 |
| O  | 3.71847300  | 0.63235400  | -2.65340900 | O  | 3.61308200  | 0.81394200  | -2.56932900 |
| C  | 3.63159700  | -0.07247600 | -3.89617200 | C  | 3.30256700  | 0.07936900  | -3.77648700 |
| H  | 3.61290200  | -1.14204500 | -3.67398700 | H  | 2.82856000  | -0.85712700 | -3.48029800 |
| H  | 4.52693300  | 0.14550200  | -4.50131600 | H  | 4.23516800  | -0.15090800 | -4.30995100 |
| C  | 2.35723100  | 0.44958600  | -4.58397400 | C  | 2.36644200  | 0.96684300  | -4.62259300 |
| H  | 2.49094600  | 0.51770600  | -5.66827700 | H  | 2.88229800  | 1.32908900  | -5.51847700 |
| H  | 1.51489600  | -0.22214200 | -4.39575400 | H  | 1.48173300  | 0.40990600  | -4.94137600 |
| C  | 2.12211500  | 1.83138900  | -3.91485400 | C  | 2.03339700  | 2.13706200  | -3.67928700 |
| H  | 2.08278600  | 2.64895000  | -4.64136000 | H  | 1.84617100  | 3.07470000  | -4.20912300 |
| H  | 1.18092300  | 1.82699600  | -3.36260000 | H  | 1.15548900  | 1.90753700  | -3.07000500 |
| C  | 3.30659300  | 1.98821100  | -2.94761500 | C  | 3.26174300  | 2.19982800  | -2.77887400 |
| H  | 4.15012000  | 2.51689900  | -3.41891300 | H  | 4.10102400  | 2.72409600  | -3.26171000 |
| H  | 3.03856600  | 2.44716500  | -1.99238300 | H  | 3.05379300  | 2.62536200  | -1.79548900 |
| O  | 4.69205700  | -1.48418500 | 0.07306000  | O  | 4.91668900  | -1.07482800 | 0.32867000  |
| N  | 6.93413700  | -0.65138800 | -1.17812700 | N  | 6.83891100  | -0.72352700 | -1.51725200 |
| C  | 5.14352200  | -2.76664900 | -0.13947900 | C  | 5.07343300  | -2.43381300 | 0.15845800  |
| C  | 4.73059100  | -3.83045300 | 0.68502500  | C  | 4.67726500  | -3.35852000 | 1.13979500  |
| C  | 5.25266700  | -5.09879400 | 0.37598600  | C  | 4.90620900  | -4.71525700 | 0.84016500  |
| H  | 4.94312200  | -5.93155100 | 0.98917300  | H  | 4.59915200  | -5.44510100 | 1.57356700  |

|   |            |             |             |   |            |             |             |
|---|------------|-------------|-------------|---|------------|-------------|-------------|
| C | 6.16099800 | -5.34445600 | -0.65906200 | C | 5.51235000 | -5.17848600 | -0.32969500 |
| C | 6.56597000 | -4.24569000 | -1.42649200 | C | 5.89628300 | -4.21340500 | -1.26911700 |
| H | 7.28289600 | -4.37363200 | -2.23406200 | H | 6.37149700 | -4.51011300 | -2.20086300 |
| C | 6.06463800 | -2.97062500 | -1.18680600 | C | 5.67080200 | -2.86173000 | -1.04489200 |
| C | 3.75555600 | -3.63417300 | 1.86472000  | C | 3.96027000 | -2.99377800 | 2.46047700  |
| C | 3.60700900 | -4.91873300 | 2.70750700  | C | 4.23438700 | -4.05628500 | 3.55227800  |
| H | 4.56610800 | -5.25100600 | 3.12228400  | H | 5.31022200 | -4.19459900 | 3.71286600  |
| H | 2.93260000 | -4.71933200 | 3.54776400  | H | 3.78950800 | -3.72702000 | 4.49764900  |
| H | 3.17301600 | -5.74519800 | 2.13335000  | H | 3.79351600 | -5.03097500 | 3.32079800  |
| C | 4.25919700 | -2.52398700 | 2.81997900  | C | 4.40642400 | -1.63726700 | 3.04960000  |
| H | 4.33921900 | -1.55521000 | 2.32807100  | H | 4.04244600 | -0.79430300 | 2.46632000  |
| H | 3.56293900 | -2.42258000 | 3.66170900  | H | 4.00388000 | -1.53644800 | 4.06497100  |
| H | 5.24054700 | -2.79293200 | 3.23130100  | H | 5.49703400 | -1.56765800 | 3.10821300  |
| C | 2.35504200 | -3.27386500 | 1.32277500  | C | 2.43914200 | -2.95179900 | 2.18694400  |
| H | 1.96745600 | -4.08764700 | 0.69793300  | H | 2.08288400 | -3.92534800 | 1.82856500  |
| H | 1.65472300 | -3.13204900 | 2.15513500  | H | 1.89459400 | -2.71364000 | 3.10979400  |
| H | 2.34005400 | -2.36359700 | 0.72242200  | H | 2.18241500 | -2.20174000 | 1.43238300  |
| C | 6.72570300 | -6.74235000 | -0.96275200 | C | 5.76708400 | -6.66815100 | -0.60971200 |
| C | 6.36023700 | -7.13916100 | -2.41206300 | C | 5.02661900 | -7.08088900 | -1.90308600 |
| H | 6.76860000 | -6.43190400 | -3.14173300 | H | 5.36726300 | -6.50262000 | -2.76838200 |
| H | 6.75917800 | -8.13296000 | -2.65080600 | H | 5.19837400 | -8.14212500 | -2.12203900 |
| H | 5.27267600 | -7.16542500 | -2.54469600 | H | 3.94740700 | -6.92160300 | -1.79965200 |
| C | 8.26460600 | -6.71944100 | -0.81062900 | C | 7.28518200 | -6.90185700 | -0.79043500 |
| H | 8.54968200 | -6.44231200 | 0.21071800  | H | 7.83213900 | -6.61970400 | 0.11679500  |
| H | 8.68724900 | -7.70827200 | -1.02814400 | H | 7.48992200 | -7.95938800 | -0.99844300 |
| H | 8.72972900 | -6.00108700 | -1.49408800 | H | 7.69018100 | -6.31471500 | -1.62155300 |
| C | 6.16825300 | -7.82196300 | -0.01668600 | C | 5.27614500 | -7.57526900 | 0.53357900  |
| H | 5.07837400 | -7.90634200 | -0.09470200 | H | 4.19636100 | -7.47756500 | 0.69342700  |
| H | 6.59587100 | -8.79714500 | -0.27590700 | H | 5.48119000 | -8.62336400 | 0.28792400  |
| H | 6.42264100 | -7.61627600 | 1.02929400  | H | 5.78502100 | -7.35036500 | 1.47791100  |
| C | 6.48486100 | -1.78463000 | -2.02408400 | C | 6.03380600 | -1.82929400 | -2.08531400 |
| H | 5.62565300 | -1.41900800 | -2.59534100 | H | 5.11543100 | -1.37790400 | -2.47342600 |
| H | 7.25974500 | -2.07901200 | -2.75153700 | H | 6.55024200 | -2.30743800 | -2.93457800 |
| C | 8.22118400 | -0.95018700 | -0.49651600 | C | 8.17155700 | -1.19103900 | -1.03100400 |
| H | 8.32618900 | -2.03970200 | -0.47499100 | H | 8.35100400 | -2.20774100 | -1.40133200 |
| H | 9.05978300 | -0.55721700 | -1.09137700 | H | 8.94336600 | -0.55223400 | -1.46991000 |
| C | 8.29553600 | -0.43649100 | 0.92755100  | C | 8.30798900 | -1.16560400 | 0.47886600  |
| C | 7.49188800 | -1.02241600 | 1.91387100  | C | 8.11410300 | -2.32574500 | 1.23851400  |
| H | 6.83009100 | -1.84069600 | 1.65109100  | H | 7.86239700 | -3.25818400 | 0.74072300  |
| C | 7.53937200 | -0.56981200 | 3.23110200  | C | 8.21701500 | -2.28923400 | 2.63010900  |
| H | 6.90371200 | -1.03399300 | 3.98061700  | H | 8.05230600 | -3.19656500 | 3.20540000  |
| C | 8.39823200 | 0.47581500  | 3.58248700  | C | 8.52311000 | -1.09134900 | 3.27917000  |
| H | 8.43481800 | 0.83194000  | 4.60900900  | H | 8.60132800 | -1.06144700 | 4.36273500  |
| C | 9.20941500 | 1.05886600  | 2.60761000  | C | 8.73204700 | 0.06781100  | 2.52769500  |
| H | 9.87641900 | 1.87626500  | 2.86818700  | H | 8.97561000 | 1.00363900  | 3.02404800  |
| C | 9.16037300 | 0.59983500  | 1.29057000  | C | 8.62407200 | 0.03063800  | 1.13707600  |
| H | 9.77457300 | 1.07481100  | 0.53138500  | H | 8.77724400 | 0.93742000  | 0.55836600  |
| C | 6.97330900 | 0.59626800  | -1.97002700 | C | 6.92721000 | 0.40501000  | -2.47264500 |
| H | 7.71529200 | 0.50525200  | -2.78389600 | H | 7.54532000 | 0.12570200  | -3.34370300 |
| H | 5.98418900 | 0.70415700  | -2.42554500 | H | 5.90976100 | 0.59093200  | -2.82383400 |
| C | 7.27126400 | 1.82747900  | -1.14646900 | C | 7.45954900 | 1.66786000  | -1.83696700 |
| C | 6.42631600 | 2.18372900  | -0.08798200 | C | 6.64496200 | 2.40178500  | -0.96416700 |
| H | 5.57447200 | 1.55653700  | 0.14790100  | H | 5.63267400 | 2.06314800  | -0.76637700 |
| C | 6.69385700 | 3.31033900  | 0.68671600  | C | 7.12382100 | 3.55241900  | -0.33745100 |
| H | 6.03106300 | 3.56859900  | 1.50704200  | H | 6.48139000 | 4.10150700  | 0.34478300  |
| C | 7.81058700 | 4.10348600  | 0.40540800  | C | 8.43329800 | 3.98140000  | -0.57714500 |
| H | 8.02081400 | 4.98191400  | 1.00986900  | H | 8.81025000 | 4.87438800  | -0.08591700 |
| C | 8.65008600 | 3.76601600  | -0.65608200 | C | 9.25081200 | 3.26467400  | -1.45199300 |

|   |             |             |             |   |             |             |             |
|---|-------------|-------------|-------------|---|-------------|-------------|-------------|
| H | 9.51771400  | 4.38004500  | -0.88377900 | H | 10.26703000 | 3.59704100  | -1.64720000 |
| C | 8.37900400  | 2.63221100  | -1.42709900 | C | 8.76217300  | 2.11613100  | -2.08071000 |
| H | 9.04045600  | 2.36550000  | -2.24885300 | H | 9.40013600  | 1.56145400  | -2.76569900 |
| H | 5.45500800  | -0.89020200 | -0.19509400 | H | 5.65188000  | -0.64876000 | -0.21093300 |
| C | 0.27371000  | -1.61136800 | -1.55142700 | C | 0.79305600  | -1.73080500 | -1.22512400 |
| H | -0.56185500 | -2.20454300 | -1.10156400 | H | -0.07794400 | -2.31024600 | -0.82548500 |
| C | 1.17678700  | -2.63318400 | -2.27936600 | C | 1.87504200  | -2.77615300 | -1.55681300 |
| H | 1.66009700  | -3.26228300 | -1.52759900 | H | 2.16726300  | -3.29650400 | -0.64224600 |
| H | 0.62018000  | -3.26617000 | -2.97854700 | H | 1.52787100  | -3.50708800 | -2.29420600 |
| H | 1.96407900  | -2.10873400 | -2.83102100 | H | 2.77265600  | -2.28717200 | -1.95151300 |
| O | -0.65655500 | 0.47622700  | -2.43153000 | O | 0.25625300  | -1.67649100 | -3.63990700 |
| O | -0.96943300 | -1.39412000 | -3.63494800 | O | -0.47254600 | 0.00282700  | -2.32623200 |
| C | -1.77171900 | -0.61372900 | -4.54403100 | C | -1.30126600 | 0.44790500  | -3.41918300 |
| H | -1.19015900 | 0.21955600  | -4.94819800 | H | -1.87844300 | -0.38521000 | -3.82182300 |
| H | -2.06250200 | -1.30169800 | -5.33914600 | H | -1.96543200 | 1.19827300  | -2.99943800 |
| H | -2.65297800 | -0.21970300 | -4.03284300 | H | -0.68894700 | 0.88285200  | -4.21277000 |
| O | 0.92705800  | -0.84823400 | -0.63712700 | O | 1.19723500  | -0.75449300 | -0.35627900 |
| C | -0.46998100 | -0.72473500 | -2.57358100 | C | 0.21089900  | -1.16424300 | -2.53805600 |
| C | 2.84731000  | 2.95307200  | 0.84189600  | C | 2.70065100  | 3.37330100  | 0.79375600  |
| H | 3.68133600  | 3.54595000  | 0.38870400  | H | 2.99623400  | 4.12642500  | 0.02339700  |
| C | 1.94615200  | 3.97548000  | 1.57138300  | C | 1.78252900  | 4.12386000  | 1.78793900  |
| H | 1.16251900  | 3.45142100  | 2.12858300  | H | 1.56383200  | 3.47731200  | 2.64348600  |
| H | 2.50520200  | 4.61121900  | 2.26610600  | H | 2.24225300  | 5.04720400  | 2.15519700  |
| H | 1.45816700  | 4.60170600  | 0.82025100  | H | 0.83845700  | 4.35920500  | 1.28633200  |
| O | 3.78168900  | 0.86705300  | 1.72124700  | O | 4.69298500  | 3.98125700  | 2.08742600  |
| O | 4.09469200  | 2.73844100  | 2.92304500  | O | 4.42670300  | 1.81793800  | 1.50627100  |
| C | 4.89884600  | 1.95937200  | 3.83160500  | C | 5.63820200  | 1.52110700  | 2.23168700  |
| H | 5.78022800  | 1.56651500  | 3.31974800  | H | 5.45661300  | 1.60511900  | 3.30718700  |
| H | 5.18930500  | 2.64789800  | 4.62636000  | H | 5.89724900  | 0.50174400  | 1.96536900  |
| H | 4.31883500  | 1.12530600  | 4.23638300  | H | 6.43628800  | 2.20573000  | 1.94567500  |
| O | 2.19138200  | 2.18869300  | -0.06947700 | O | 2.12705000  | 2.26424000  | 0.25218900  |
| C | 3.59416700  | 2.06790500  | 1.86293500  | C | 4.03231400  | 3.12290000  | 1.53432800  |

C

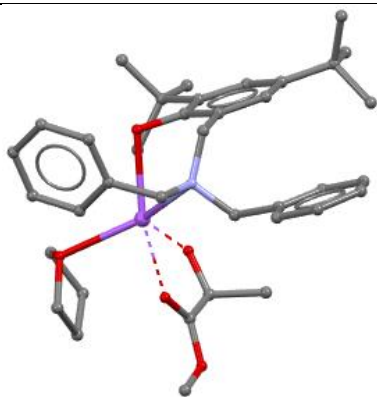

D

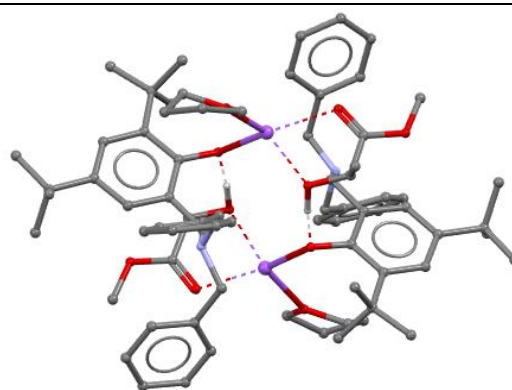

|    |             |             |             |    |             |             |             |
|----|-------------|-------------|-------------|----|-------------|-------------|-------------|
| Na | 3.73109900  | -1.42035100 | -2.16433600 | Na | 10.20102600 | 11.27878500 | 10.54781000 |
| O  | 1.47129500  | -0.77341000 | -3.15197800 | O  | 10.62521300 | 9.22079500  | 9.79984600  |
| C  | 0.41159500  | -1.36584700 | -2.37743600 | O  | 12.31852500 | 12.12977400 | 11.14040000 |
| H  | 0.68250300  | -2.40417700 | -2.18063900 | N  | 12.28200900 | 11.46000300 | 6.75106500  |
| H  | -0.52360100 | -1.34482000 | -2.96124000 | C  | 11.86903400 | 8.91401000  | 9.42316300  |
| C  | 0.33300300  | -0.48477400 | -1.13036400 | C  | 12.69772800 | 8.03314100  | 10.19246500 |
| H  | -0.62952700 | -0.56375700 | -0.61542600 | C  | 13.99275300 | 7.75744900  | 9.73109000  |
| H  | 1.14563300  | -0.77224000 | -0.45410200 | H  | 14.61218700 | 7.09512400  | 10.31936800 |
| C  | 0.59581200  | 0.92899200  | -1.70905100 | C  | 14.52542500 | 8.28298200  | 8.54614300  |
| H  | -0.33001000 | 1.50334600  | -1.82029200 | C  | 13.69301000 | 9.12117800  | 7.80192300  |
| H  | 1.26546200  | 1.50424500  | -1.06435800 | H  | 14.03687100 | 9.55464900  | 6.86693300  |

|   |            |             |             |   |             |             |             |
|---|------------|-------------|-------------|---|-------------|-------------|-------------|
| C | 1.22975200 | 0.64689700  | -3.09466000 | C | 12.39988800 | 9.44028100  | 8.21005100  |
| H | 0.54477800 | 0.92291600  | -3.91009200 | C | 12.16889600 | 7.38383500  | 11.49088100 |
| H | 2.18705800 | 1.14746500  | -3.24581800 | C | 13.18983300 | 6.42486400  | 12.13667100 |
| O | 4.43168700 | -3.63971000 | -2.92423800 | H | 13.45337200 | 5.59707100  | 11.46832100 |
| N | 6.52596900 | -1.41069300 | -3.07269200 | H | 12.75613900 | 5.99131900  | 13.04557900 |
| C | 5.33622700 | -4.05837100 | -1.95187500 | H | 14.11348300 | 6.93942200  | 12.42610400 |
| C | 4.86473300 | -4.85491400 | -0.89332800 | C | 10.89975200 | 6.55077000  | 11.18760500 |
| C | 5.81361000 | -5.23991900 | 0.06728000  | H | 10.13474300 | 7.15981700  | 10.70648700 |
| H | 5.47367400 | -5.84477700 | 0.89377600  | H | 10.48308500 | 6.13331400  | 12.11315800 |
| C | 7.16789500 | -4.89382400 | 0.01317300  | H | 11.14611300 | 5.71133200  | 10.52522200 |
| C | 7.57795100 | -4.09827500 | -1.06054200 | C | 11.84785900 | 8.47068000  | 12.54438500 |
| H | 8.61475000 | -3.78898300 | -1.15166600 | H | 12.76636400 | 8.96277000  | 12.88294400 |
| C | 6.68112200 | -3.65879100 | -2.03174000 | H | 11.36152500 | 8.02583200  | 13.42215700 |
| C | 3.39906000 | -5.32870800 | -0.80188200 | H | 11.18330900 | 9.23095400  | 12.13388100 |
| C | 3.12491500 | -6.09929300 | 0.50560000  | C | 15.93821100 | 7.96036300  | 8.03542200  |
| H | 3.29873600 | -5.47353800 | 1.38830400  | C | 16.74344700 | 9.27048300  | 7.87020000  |
| H | 2.07578000 | -6.41399800 | 0.52288800  | H | 16.27472100 | 9.94086800  | 7.14217500  |
| H | 3.73694700 | -7.00432200 | 0.59219100  | H | 17.76265100 | 9.06043300  | 7.52091200  |
| C | 2.41966000 | -4.13058500 | -0.84103300 | H | 16.81055000 | 9.80776500  | 8.82344000  |
| H | 2.37163600 | -3.70926200 | -1.84725700 | C | 15.83600600 | 7.25363900  | 6.66256000  |
| H | 1.40817500 | -4.47153600 | -0.58578000 | H | 15.26650500 | 6.32102200  | 6.75321900  |
| H | 2.70614600 | -3.33330400 | -0.14613200 | H | 16.83303300 | 7.01207900  | 6.27167200  |
| C | 3.10457700 | -6.28082900 | -1.98598400 | H | 15.32909300 | 7.88443600  | 5.92412600  |
| H | 3.75059900 | -7.16590100 | -1.94425600 | C | 16.71577600 | 7.03920800  | 8.99302100  |
| H | 2.06144200 | -6.61911400 | -1.94658700 | H | 16.83798500 | 7.49645800  | 9.98171800  |
| H | 3.26508300 | -5.78113000 | -2.94474300 | H | 17.71635500 | 6.84085100  | 8.59132600  |
| C | 8.19343500 | -5.36361200 | 1.05872000  | H | 16.21306800 | 6.07415300  | 9.12371500  |
| C | 9.22778500 | -6.28521600 | 0.37125500  | C | 11.55571200 | 10.30198600 | 7.29121400  |
| H | 9.75081400 | -5.76689000 | -0.43975900 | H | 11.26530400 | 9.70168400  | 6.42303400  |
| H | 9.98033400 | -6.62610100 | 1.09336200  | H | 10.62674300 | 10.60679500 | 7.79329900  |
| H | 8.73859400 | -7.16803000 | -0.05600600 | C | 12.41954600 | 12.51971200 | 7.74904300  |
| C | 8.92533300 | -4.14217300 | 1.66210900  | H | 12.60877500 | 12.02124000 | 8.70509200  |
| H | 8.21270500 | -3.44849100 | 2.12296600  | H | 11.48525600 | 13.08619100 | 7.88122900  |
| H | 9.63590100 | -4.46519600 | 2.43284400  | C | 13.56706700 | 13.45983100 | 7.45962500  |
| H | 9.49146200 | -3.59225300 | 0.90344000  | C | 14.83661900 | 12.94919900 | 7.15451400  |
| C | 7.53984300 | -6.14558700 | 2.21304000  | H | 14.95680300 | 11.87275100 | 7.07975300  |
| H | 7.04596700 | -7.05750300 | 1.85885600  | C | 15.92009800 | 13.80422300 | 6.96102600  |
| H | 8.30611400 | -6.44634600 | 2.93641000  | H | 16.90003000 | 13.39215700 | 6.73309100  |
| H | 6.79891000 | -5.53777500 | 2.74465300  | C | 15.74907600 | 15.18858500 | 7.06366600  |
| C | 7.14436200 | -2.74907900 | -3.14579800 | H | 16.59317400 | 15.85631900 | 6.91233700  |
| H | 6.87940800 | -3.17946000 | -4.12066000 | C | 14.48667100 | 15.70813700 | 7.35460800  |
| H | 8.24361900 | -2.68325200 | -3.13866900 | H | 14.34246100 | 16.78336300 | 7.42506200  |
| C | 6.59863300 | -0.70158500 | -4.36638700 | C | 13.40314700 | 14.84624500 | 7.54764900  |
| H | 6.41303300 | 0.35855700  | -4.16760700 | H | 12.41779900 | 15.25154500 | 7.76973500  |
| H | 7.59576200 | -0.78141400 | -4.83050500 | C | 11.67703400 | 11.94634700 | 5.50762100  |
| C | 5.53288200 | -1.23112600 | -5.30517600 | H | 12.12941600 | 12.92126500 | 5.28706600  |
| C | 4.19578100 | -0.85004400 | -5.11067400 | H | 10.59127100 | 12.11582600 | 5.61813200  |
| H | 3.96438900 | -0.09785300 | -4.35917200 | C | 11.95205800 | 11.00018300 | 4.35640200  |
| C | 3.16968900 | -1.42222300 | -5.86173700 | C | 13.27000300 | 10.59859700 | 4.09030700  |
| H | 2.14223800 | -1.14102300 | -5.65555800 | H | 14.06738900 | 10.97672500 | 4.72368300  |
| C | 3.47246800 | -2.37169300 | -6.84301200 | C | 13.55059800 | 9.73141100  | 3.03549700  |
| H | 2.67630200 | -2.82310000 | -7.42852800 | H | 14.57785400 | 9.43487600  | 2.83731900  |
| C | 4.80074000 | -2.73543600 | -7.06980300 | C | 12.51288000 | 9.24185000  | 2.23359100  |
| H | 5.04291300 | -3.46570200 | -7.83729900 | H | 12.73020700 | 8.56268700  | 1.41311300  |
| C | 5.82433200 | -2.16906700 | -6.30298900 | C | 11.19933100 | 9.63136500  | 2.49412000  |
| H | 6.85778400 | -2.46025400 | -6.47819400 | H | 10.38489100 | 9.25187500  | 1.88242100  |
| C | 6.97505700 | -0.62769000 | -1.89908700 | C | 10.92391200 | 10.50681500 | 3.54852000  |
| H | 6.47569200 | 0.34199600  | -1.96401500 | H | 9.89842100  | 10.81191500 | 3.74163800  |

|   |             |             |             |    |             |             |             |
|---|-------------|-------------|-------------|----|-------------|-------------|-------------|
| H | 6.56629000  | -1.12571800 | -1.01435000 | C  | 13.52935100 | 11.40403100 | 11.43979700 |
| C | 8.47354800  | -0.45180100 | -1.71728300 | H  | 13.41987400 | 10.39949400 | 11.03137100 |
| C | 9.11101600  | -1.03364200 | -0.61411600 | H  | 13.65908800 | 11.34162100 | 12.53106200 |
| H | 8.51710000  | -1.59333900 | 0.10250000  | C  | 14.64051200 | 12.21906600 | 10.78770200 |
| C | 10.48768700 | -0.90253900 | -0.42411900 | H  | 15.62070100 | 12.02159400 | 11.23234500 |
| H | 10.95888200 | -1.36100100 | 0.44170800  | H  | 14.69870400 | 11.98578700 | 9.72123000  |
| C | 11.25318300 | -0.18348700 | -1.34346400 | C  | 14.16379300 | 13.66759800 | 11.00752600 |
| H | 12.32580200 | -0.08079700 | -1.20221400 | H  | 14.54566300 | 14.05709100 | 11.95757000 |
| C | 10.62904000 | 0.41480900  | -2.44089000 | H  | 14.48992700 | 14.33725000 | 10.20769000 |
| H | 11.21535900 | 0.99026000  | -3.15279600 | C  | 12.62539600 | 13.54084100 | 11.05660900 |
| C | 9.25115900  | 0.28625500  | -2.62170000 | H  | 12.19306300 | 14.05431200 | 11.92519400 |
| H | 8.77625600  | 0.77687700  | -3.46659400 | H  | 12.14484100 | 13.92144900 | 10.15148100 |
| H | 4.91162200  | -3.27231900 | -3.68540300 | Na | 8.59005900  | 9.46156600  | 6.35582600  |
| O | 3.41132700  | -1.05391100 | -0.08721800 | O  | 8.28229900  | 11.53822400 | 7.13119400  |
| C | 3.64139600  | 0.17995100  | 0.40171000  | O  | 6.62220600  | 8.88343500  | 5.22585000  |
| H | 2.77170500  | 0.62618400  | 0.94575800  | N  | 6.13433300  | 9.08273300  | 9.62836000  |
| C | 4.83770400  | 0.24531700  | 1.39425400  | C  | 7.01109000  | 11.87533300 | 7.36192700  |
| H | 4.63322100  | -0.46155700 | 2.20401800  | C  | 6.33777600  | 12.86642500 | 6.57848500  |
| H | 5.75732100  | -0.07796200 | 0.89188000  | C  | 5.01415900  | 13.19117900 | 6.90791300  |
| H | 4.99096000  | 1.24677500  | 1.81537400  | H  | 4.51194600  | 13.94259800 | 6.31502300  |
| C | 3.92819200  | 1.21906600  | -0.71539300 | C  | 4.30928300  | 12.60602400 | 7.96917100  |
| O | 4.16866300  | 0.94938600  | -1.89093800 | C  | 4.98843200  | 11.64502200 | 8.72215300  |
| O | 3.87829600  | 2.49887800  | -0.29188900 | H  | 4.50136900  | 11.15146000 | 9.55920000  |
| C | 4.14698800  | 3.50896400  | -1.27697100 | C  | 6.30104300  | 11.27285000 | 8.44145900  |
| H | 3.41111100  | 3.46488500  | -2.08583500 | C  | 7.06714200  | 13.58972900 | 5.42421600  |
| H | 4.07563000  | 4.46145300  | -0.75033600 | C  | 6.16004600  | 14.59691600 | 4.68916000  |
| H | 5.14755500  | 3.38132800  | -1.70114100 | H  | 5.80959100  | 15.39573800 | 5.35287100  |
|   |             |             |             | H  | 6.72420500  | 15.06856600 | 3.87605200  |
|   |             |             |             | H  | 5.28333700  | 14.11080700 | 4.24512300  |
|   |             |             |             | C  | 8.27822600  | 14.38039800 | 5.97633300  |
|   |             |             |             | H  | 8.97135400  | 13.72399700 | 6.50262100  |
|   |             |             |             | H  | 8.82018300  | 14.87036200 | 5.15692300  |
|   |             |             |             | H  | 7.94223000  | 15.16346700 | 6.66770200  |
|   |             |             |             | C  | 7.56130500  | 12.57124400 | 4.37132400  |
|   |             |             |             | H  | 6.71650800  | 12.05459600 | 3.90303700  |
|   |             |             |             | H  | 8.12654600  | 13.08019100 | 3.57983500  |
|   |             |             |             | H  | 8.21086000  | 11.83099300 | 4.83805900  |
|   |             |             |             | C  | 2.86476500  | 12.98365700 | 8.33229700  |
|   |             |             |             | C  | 1.95692700  | 11.73855700 | 8.20239900  |
|   |             |             |             | H  | 2.28706000  | 10.92936300 | 8.86166900  |
|   |             |             |             | H  | 0.91889800  | 11.98245600 | 8.46335000  |
|   |             |             |             | H  | 1.97146900  | 11.35473100 | 7.17559700  |
|   |             |             |             | C  | 2.82031600  | 13.49647000 | 9.79153400  |
|   |             |             |             | H  | 3.47244500  | 14.36966900 | 9.91144900  |
|   |             |             |             | H  | 1.79940300  | 13.78538700 | 10.07279600 |
|   |             |             |             | H  | 3.15668600  | 12.72902800 | 10.49687300 |
|   |             |             |             | C  | 2.29565100  | 14.08749200 | 7.42217200  |
|   |             |             |             | H  | 2.27033300  | 13.77326400 | 6.37244600  |
|   |             |             |             | H  | 1.26842600  | 14.32576100 | 7.72196800  |
|   |             |             |             | H  | 2.88453600  | 15.00954800 | 7.48810200  |
|   |             |             |             | C  | 6.97952200  | 10.25423300 | 9.33559500  |
|   |             |             |             | H  | 7.20457600  | 10.71486900 | 10.30155000 |
|   |             |             |             | H  | 7.94546400  | 9.96082000  | 8.90319800  |
|   |             |             |             | C  | 5.86817500  | 8.29791300  | 8.42102700  |
|   |             |             |             | H  | 5.69700100  | 9.01197500  | 7.61145900  |
|   |             |             |             | H  | 6.74782100  | 7.70005600  | 8.13393700  |
|   |             |             |             | C  | 4.65329400  | 7.40540100  | 8.54233700  |
|   |             |             |             | C  | 3.44550400  | 7.92022200  | 9.03317500  |



|   |             |             |             |
|---|-------------|-------------|-------------|
| H | 3.42484100  | 8.94766300  | 9.38220500  |
| C | 2.29966500  | 7.12757300  | 9.07760300  |
| H | 1.36922900  | 7.54374200  | 9.45590700  |
| C | 2.34386000  | 5.80198700  | 8.63479400  |
| H | 1.45044000  | 5.18400400  | 8.66858200  |
| C | 3.54453400  | 5.27482500  | 8.15726500  |
| H | 3.59288000  | 4.24063800  | 7.82545000  |
| C | 4.69118300  | 6.07273300  | 8.11716800  |
| H | 5.62981900  | 5.65459700  | 7.75908700  |
| C | 6.74139700  | 8.22466100  | 10.65660800 |
| H | 6.06849100  | 7.36898500  | 10.79570100 |
| H | 7.70966500  | 7.82215800  | 10.31163300 |
| C | 6.92998600  | 8.94246500  | 11.97196400 |
| C | 5.82899000  | 9.45841100  | 12.66710500 |
| H | 4.83419500  | 9.32969800  | 12.24772600 |
| C | 6.00943000  | 10.13426200 | 13.87477500 |
| H | 5.14703000  | 10.52370100 | 14.41109000 |
| C | 7.29463000  | 10.30984700 | 14.39826500 |
| H | 7.43333400  | 10.83792800 | 15.33816600 |
| C | 8.39613200  | 9.80086500  | 13.70880700 |
| H | 9.40091800  | 9.93340300  | 14.10298300 |
| C | 8.21114000  | 9.12102300  | 12.50327000 |
| H | 9.06490100  | 8.73640600  | 11.95437000 |
| C | 5.44602800  | 9.66436400  | 4.91474300  |
| H | 5.43326500  | 10.52533100 | 5.58552700  |
| H | 5.51460600  | 10.02121900 | 3.87705500  |
| C | 4.27364300  | 8.70375500  | 5.09165300  |
| H | 3.39064800  | 9.01706900  | 4.52650400  |
| H | 3.99312300  | 8.62540300  | 6.14603400  |
| C | 4.86824300  | 7.37692500  | 4.58822300  |
| H | 4.77176100  | 7.30304300  | 3.49905800  |
| H | 4.38530500  | 6.50402000  | 5.03620500  |
| C | 6.34931000  | 7.48263600  | 4.99264000  |
| H | 7.03353500  | 7.10985400  | 4.22199400  |
| H | 6.55221400  | 6.94819000  | 5.92623800  |
| H | 9.71033800  | 8.47915600  | 8.78576000  |
| O | 9.19359400  | 7.94664100  | 8.07878000  |
| C | 9.98014800  | 6.83714900  | 7.68938200  |
| H | 10.81548100 | 6.69219000  | 8.37961400  |
| H | 9.04248500  | 12.32683900 | 8.24862600  |
| O | 9.46192500  | 12.87040900 | 9.00665600  |
| C | 8.52518400  | 13.82321700 | 9.47093100  |
| H | 7.72362200  | 13.97072400 | 8.74255000  |
| C | 9.23096100  | 15.15601100 | 9.73464900  |
| H | 9.66968700  | 15.51399200 | 8.79850300  |
| H | 8.52752400  | 15.90608900 | 10.11082000 |
| H | 10.03303800 | 15.02017800 | 10.46759500 |
| C | 9.11730400  | 5.57277600  | 7.65106000  |
| H | 8.28106600  | 5.71094200  | 6.95715200  |
| H | 9.70257100  | 4.70296100  | 7.33397200  |
| H | 8.71304500  | 5.38929200  | 8.65066100  |
| C | 10.57329900 | 7.10567600  | 6.30634200  |
| C | 7.88256300  | 13.31304900 | 10.75993100 |
| O | 10.04717100 | 7.82467800  | 5.46597400  |
| O | 11.72389700 | 6.46791500  | 6.11166600  |
| C | 12.41050900 | 6.76434900  | 4.87379700  |
| H | 12.61259700 | 7.83459100  | 4.80918200  |
| H | 13.34036600 | 6.19890500  | 4.91992300  |

---

|   |             |             |             |
|---|-------------|-------------|-------------|
| H | 11.80440800 | 6.45929700  | 4.01738200  |
| O | 8.40981100  | 12.50804500 | 11.51557000 |
| O | 6.68638600  | 13.85605200 | 10.97789900 |
| C | 5.96983900  | 13.37178700 | 12.13497000 |
| H | 5.00043000  | 13.86760900 | 12.09838700 |
| H | 5.85649200  | 12.28735200 | 12.07769300 |
| H | 6.50897500  | 13.62663400 | 13.05120000 |

**Table S10.** DFT optimized structures and atom coordinates of proposed complexes obtained between  $[(d\text{-tbL}^{\text{Bn}})\text{Na}(\text{THF})_2]$  and methyl lactate.

| 1                                                                                  |             |             |             | 2                                                                                   |             |             |             |
|------------------------------------------------------------------------------------|-------------|-------------|-------------|-------------------------------------------------------------------------------------|-------------|-------------|-------------|
| 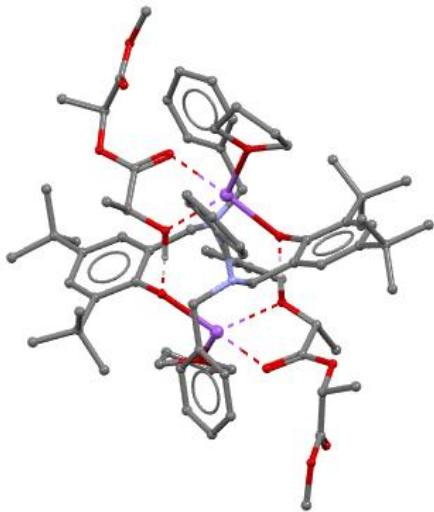 |             |             |             |  |             |             |             |
| Na                                                                                 | 10.15782700 | 11.61957900 | 10.54622400 | Na                                                                                  | 10.45371200 | 11.37122400 | 10.48509900 |
| O                                                                                  | 10.72454900 | 9.54154400  | 9.99965100  | O                                                                                   | 10.75866700 | 9.15003300  | 10.26254100 |
| O                                                                                  | 12.17566100 | 12.62301500 | 11.19440300 | O                                                                                   | 12.36357200 | 12.54531000 | 11.09335900 |
| N                                                                                  | 12.39661600 | 11.67492800 | 6.87374000  | N                                                                                   | 13.19590400 | 10.69475600 | 7.21313900  |
| C                                                                                  | 11.99932500 | 9.28524700  | 9.69581300  | C                                                                                   | 12.08105200 | 9.04400300  | 10.40769100 |
| C                                                                                  | 12.83719000 | 8.49795300  | 10.55070800 | C                                                                                   | 12.69038500 | 8.57306800  | 11.61235700 |
| C                                                                                  | 14.16518700 | 8.26861800  | 10.16303900 | C                                                                                   | 14.08871100 | 8.46905600  | 11.65940300 |
| H                                                                                  | 14.79119000 | 7.67661500  | 10.81595800 | H                                                                                   | 14.54290000 | 8.10243800  | 12.56936400 |
| C                                                                                  | 14.72130500 | 8.75321400  | 8.97164300  | C                                                                                   | 14.92809200 | 8.83307800  | 10.59898900 |
| C                                                                                  | 13.87985100 | 9.49986600  | 8.14421300  | C                                                                                   | 14.30905800 | 9.30597600  | 9.43678100  |
| H                                                                                  | 14.24170500 | 9.89364500  | 7.19936900  | H                                                                                   | 14.90778500 | 9.62985300  | 8.59324200  |
| C                                                                                  | 12.55516500 | 9.77142100  | 8.47770100  | C                                                                                   | 12.92596800 | 9.40329800  | 9.31836200  |
| C                                                                                  | 12.27857900 | 7.88809600  | 11.85467200 | C                                                                                   | 11.82623500 | 8.20889200  | 12.83686100 |
| C                                                                                  | 13.31989800 | 7.03517900  | 12.60761200 | C                                                                                   | 12.66917000 | 7.75103700  | 14.04355700 |
| H                                                                                  | 13.66946300 | 6.18875100  | 12.00526600 | H                                                                                   | 13.25766400 | 6.85481600  | 13.81573000 |
| H                                                                                  | 12.86522800 | 6.62754000  | 13.51820100 | H                                                                                   | 12.00411700 | 7.50418700  | 14.87935000 |
| H                                                                                  | 14.19316800 | 7.62441000  | 12.91091800 | H                                                                                   | 13.35583300 | 8.53411600  | 14.38657200 |
| C                                                                                  | 11.08538600 | 6.95735600  | 11.52699000 | C                                                                                   | 10.84616500 | 7.06292600  | 12.49111600 |
| H                                                                                  | 10.30813700 | 7.49080600  | 10.98037000 | H                                                                                   | 10.23387900 | 7.31544100  | 11.62481000 |
| H                                                                                  | 10.64806600 | 6.55190700  | 12.44832500 | H                                                                                   | 10.18084100 | 6.86056000  | 13.34071300 |
| H                                                                                  | 11.42180600 | 6.11053600  | 10.91552600 | H                                                                                   | 11.39749900 | 6.13947000  | 12.27533800 |
| C                                                                                  | 11.82926700 | 9.00613900  | 12.82548700 | C                                                                                   | 11.02153400 | 9.45069900  | 13.28656200 |
| H                                                                                  | 12.69374900 | 9.57963800  | 13.17881700 | H                                                                                   | 11.68934200 | 10.29159000 | 13.51134600 |
| H                                                                                  | 11.32882600 | 8.57641800  | 13.70280500 | H                                                                                   | 10.43430300 | 9.22920900  | 14.18692100 |
| H                                                                                  | 11.13749400 | 9.69401600  | 12.33950400 | H                                                                                   | 10.32851800 | 9.74729700  | 12.49818600 |
| C                                                                                  | 16.16693600 | 8.47297500  | 8.53323700  | C                                                                                   | 16.46194600 | 8.75547300  | 10.66274500 |

|    |             |             |             |    |             |             |             |
|----|-------------|-------------|-------------|----|-------------|-------------|-------------|
| C  | 16.90556700 | 9.80873800  | 8.28374200  | C  | 17.05767300 | 10.17396000 | 10.49996900 |
| H  | 16.42905400 | 10.39037000 | 7.48767100  | H  | 16.75449200 | 10.63790600 | 9.55541300  |
| H  | 17.94651000 | 9.62851300  | 7.98585900  | H  | 18.15478600 | 10.13991100 | 10.52107300 |
| H  | 16.90912000 | 10.42495000 | 9.19037700  | H  | 16.72183900 | 10.82854600 | 11.31240900 |
| C  | 16.14980900 | 7.65123900  | 7.22145000  | C  | 16.98367100 | 7.85362000  | 9.51930900  |
| H  | 15.64526000 | 6.69038900  | 7.37996600  | H  | 16.57503800 | 6.84031600  | 9.60877000  |
| H  | 17.17061100 | 7.44910700  | 6.87160900  | H  | 18.07884700 | 7.78574400  | 9.54697100  |
| H  | 15.61774300 | 8.18123700  | 6.42342000  | H  | 16.69901800 | 8.24297300  | 8.53585000  |
| C  | 16.96004100 | 7.67894300  | 9.58712200  | C  | 16.96647400 | 8.17462000  | 11.99628300 |
| H  | 17.01738700 | 8.21946800  | 10.53899100 | H  | 16.66207600 | 8.79388400  | 12.84792700 |
| H  | 17.98491300 | 7.51063400  | 9.23609000  | H  | 18.06184000 | 8.12951800  | 11.99382300 |
| H  | 16.51010600 | 6.69820700  | 9.77894400  | H  | 16.59080800 | 7.15838200  | 12.16243600 |
| C  | 11.70636000 | 10.52350100 | 7.47010800  | C  | 12.29569400 | 9.85228200  | 8.00925700  |
| H  | 11.47700600 | 9.84413100  | 6.64406700  | H  | 12.02481000 | 8.97559100  | 7.41030600  |
| H  | 10.74631300 | 10.82045800 | 7.91851100  | H  | 11.33537500 | 10.36225800 | 8.19432100  |
| C  | 12.41909100 | 12.81163800 | 7.79355200  | C  | 13.23855500 | 12.05094100 | 7.75150200  |
| H  | 12.59081800 | 12.39718700 | 8.79210200  | H  | 13.17778600 | 11.96308900 | 8.84109000  |
| H  | 11.44514000 | 13.32419200 | 7.83946600  | H  | 12.35308300 | 12.63651100 | 7.44881000  |
| C  | 13.51931000 | 13.80195000 | 7.48907800  | C  | 14.49413800 | 12.82623300 | 7.41033200  |
| C  | 14.83071000 | 13.35440600 | 7.27607000  | C  | 15.70415100 | 12.18240700 | 7.12519700  |
| H  | 15.02019600 | 12.28522500 | 7.27947600  | H  | 15.71787200 | 11.09905300 | 7.06802200  |
| C  | 15.86808200 | 14.26283100 | 7.07303700  | C  | 16.86735800 | 12.92178200 | 6.90117900  |
| H  | 16.88116800 | 13.90049700 | 6.91678000  | H  | 17.79821400 | 12.40536700 | 6.68078800  |
| C  | 15.60826500 | 15.63706400 | 7.07422600  | C  | 16.83834400 | 14.31642200 | 6.95886900  |
| H  | 16.41652900 | 16.34624900 | 6.91586500  | H  | 17.74454800 | 14.89112000 | 6.78694300  |
| C  | 14.30395900 | 16.09264900 | 7.27335300  | C  | 15.63283300 | 14.96860000 | 7.22948200  |
| H  | 14.09144900 | 17.15876300 | 7.26528800  | H  | 15.59572400 | 16.05460100 | 7.26389200  |
| C  | 13.26673800 | 15.17779600 | 7.47592500  | C  | 14.47092800 | 14.22690200 | 7.44587400  |
| H  | 12.24904600 | 15.53230500 | 7.62739200  | H  | 13.53129100 | 14.73784700 | 7.64892000  |
| C  | 11.83574600 | 12.03514600 | 5.56890300  | C  | 12.90806400 | 10.67485500 | 5.78385200  |
| H  | 12.28968300 | 12.99040000 | 5.27605700  | H  | 13.44557100 | 11.51930900 | 5.33312500  |
| H  | 10.74532900 | 12.20753000 | 5.62373900  | H  | 11.83633800 | 10.84630900 | 5.58207700  |
| C  | 12.15544200 | 10.98776000 | 4.52043700  | C  | 13.34853400 | 9.40763500  | 5.07359300  |
| C  | 13.47397800 | 10.53206600 | 4.37483800  | C  | 14.08666600 | 8.40082400  | 5.70672100  |
| H  | 14.24304400 | 10.94846600 | 5.01853800  | H  | 14.37136000 | 8.52449000  | 6.74542600  |
| C  | 13.79170000 | 9.56021300  | 3.42701700  | C  | 14.44056500 | 7.23664800  | 5.01747700  |
| H  | 14.81939000 | 9.21937000  | 3.32559600  | H  | 15.00198800 | 6.46052800  | 5.53147600  |
| C  | 12.79159000 | 9.02351200  | 2.60816300  | C  | 14.07804600 | 7.06896400  | 3.68061200  |
| H  | 13.03074200 | 8.24950400  | 1.88492600  | H  | 14.35175700 | 6.16343600  | 3.14592700  |
| C  | 11.47729300 | 9.46955500  | 2.74755900  | C  | 13.36428900 | 8.08159900  | 3.03296600  |
| H  | 10.68987700 | 9.04776300  | 2.12820600  | H  | 13.08639300 | 7.96813000  | 1.98800000  |
| C  | 11.16431700 | 10.44717000 | 3.69552200  | C  | 13.00061300 | 9.23515800  | 3.72594300  |
| H  | 10.13723600 | 10.78689600 | 3.79819100  | H  | 12.42558800 | 10.01065700 | 3.22431300  |
| C  | 13.40793700 | 11.99881300 | 11.60800100 | C  | 13.55938300 | 12.12978600 | 11.78017100 |
| H  | 13.37809800 | 10.96097200 | 11.27602100 | H  | 13.69566000 | 11.06701400 | 11.58769000 |
| H  | 13.48493900 | 12.02800400 | 12.70586500 | H  | 13.43822600 | 12.28920200 | 12.86347500 |
| C  | 14.50077800 | 12.83089100 | 10.94579000 | C  | 14.65309900 | 13.02409500 | 11.20603500 |
| H  | 15.46827400 | 12.72749600 | 11.44656300 | H  | 15.53374100 | 13.08518100 | 11.85249600 |
| H  | 14.62352100 | 12.52357200 | 9.90368100  | H  | 14.97341800 | 12.64393300 | 10.23117200 |
| C  | 13.93052300 | 14.26027600 | 11.03226300 | C  | 13.92186700 | 14.37117000 | 11.05658100 |
| H  | 14.25361900 | 14.74739900 | 11.95867600 | H  | 14.00018900 | 14.95436300 | 11.98080400 |
| H  | 14.24667800 | 14.88274400 | 10.19147000 | H  | 14.32851800 | 14.97354600 | 10.23980300 |
| C  | 12.40041800 | 14.04435300 | 11.04284400 | C  | 12.45616500 | 13.95969600 | 10.79925600 |
| H  | 11.91209000 | 14.57476900 | 11.87047900 | H  | 11.74892100 | 14.50462100 | 11.43711500 |
| H  | 11.92362500 | 14.34577700 | 10.10652000 | H  | 12.14633300 | 14.08530600 | 9.75929500  |
| Na | 8.85181600  | 9.58146400  | 6.53316700  | Na | 8.62149900  | 9.80789900  | 6.06116100  |
| O  | 8.31880700  | 11.64775600 | 7.21164000  | O  | 7.67875200  | 11.68056300 | 6.77127500  |
| O  | 7.13753500  | 8.72390600  | 5.22599700  | O  | 6.73119800  | 8.56324400  | 5.41579900  |

|   |            |             |             |   |            |             |             |
|---|------------|-------------|-------------|---|------------|-------------|-------------|
| N | 6.18628200 | 9.01181100  | 9.59237300  | N | 6.64192900 | 9.21168900  | 9.77087300  |
| C | 6.99225000 | 11.80430100 | 7.25107100  | C | 6.39913300 | 11.74864300 | 7.10564300  |
| C | 6.29947100 | 12.62807000 | 6.30771600  | C | 5.41938800 | 12.42003400 | 6.30623500  |
| C | 4.89942300 | 12.67183500 | 6.35963700  | C | 4.06823800 | 12.30397400 | 6.66407000  |
| H | 4.38148200 | 13.27444200 | 5.62719200  | H | 3.33123600 | 12.78633500 | 6.03705600  |
| C | 4.13155500 | 11.96066500 | 7.29204100  | C | 3.61906500 | 11.58761500 | 7.78162700  |
| C | 4.83223300 | 11.21067000 | 8.24131800  | C | 4.60310500 | 11.02370600 | 8.59941200  |
| H | 4.29919500 | 10.63196300 | 8.99005500  | H | 4.32786600 | 10.48658000 | 9.50216200  |
| C | 6.22320300 | 11.11782800 | 8.23705700  | C | 5.95936000 | 11.10989500 | 8.30051000  |
| C | 7.07163500 | 13.40865400 | 5.22116200  | C | 5.84557700 | 13.26167400 | 5.08484800  |
| C | 6.14302900 | 14.25268900 | 4.32496400  | C | 4.64951600 | 13.93366700 | 4.38047000  |
| H | 5.58163600 | 14.99616300 | 4.90273500  | H | 4.10242800 | 14.60384200 | 5.05298100  |
| H | 6.74479400 | 14.79336900 | 3.58510400  | H | 5.01145100 | 14.53385700 | 3.53707500  |
| H | 5.42566900 | 13.63276300 | 3.77468700  | H | 3.94236500 | 13.19683700 | 3.98194000  |
| C | 8.09132200 | 14.37822100 | 5.86422500  | C | 6.79221900 | 14.39397100 | 5.54969300  |
| H | 8.80783400 | 13.84357000 | 6.48739700  | H | 7.67622100 | 13.99012200 | 6.04328100  |
| H | 8.64642000 | 14.91678400 | 5.08502500  | H | 7.12151100 | 15.00095900 | 4.69589300  |
| H | 7.57560700 | 15.12539200 | 6.48047800  | H | 6.27997200 | 15.05366500 | 6.25967500  |
| C | 7.82318600 | 12.41971300 | 4.30074500  | C | 6.55763000 | 12.38498000 | 4.02737500  |
| H | 7.12078200 | 11.75323100 | 3.78759800  | H | 5.87637300 | 11.60962300 | 3.65872500  |
| H | 8.39915600 | 12.96057100 | 3.53838700  | H | 6.87270900 | 12.99481000 | 3.16985200  |
| H | 8.51298500 | 11.81505500 | 4.88911800  | H | 7.43634100 | 11.89455100 | 4.44690100  |
| C | 2.59542700 | 11.90466300 | 7.24627500  | C | 2.13467600 | 11.39574200 | 8.13055400  |
| C | 2.16618800 | 10.46494200 | 6.87152400  | C | 1.80744900 | 9.88333500  | 8.13710400  |
| H | 2.53567900 | 9.73166600  | 7.59609600  | H | 2.41288800 | 9.34523000  | 8.87474200  |
| H | 1.07223800 | 10.38015700 | 6.83051400  | H | 0.75080800 | 9.71265200  | 8.38133100  |
| H | 2.56679600 | 10.18800400 | 5.88894200  | H | 2.00993600 | 9.43946400  | 7.15558100  |
| C | 1.99633700 | 12.26650200 | 8.62361700  | C | 1.84106400 | 11.98106100 | 9.53176500  |
| H | 2.27621300 | 13.28599000 | 8.91307700  | H | 2.04468400 | 13.05806000 | 9.55138900  |
| H | 0.90078400 | 12.20907400 | 8.59559600  | H | 0.78900100 | 11.82740000 | 9.80496900  |
| H | 2.34087700 | 11.58531800 | 9.40871400  | H | 2.45924300 | 11.51102900 | 10.30429700 |
| C | 2.00077500 | 12.87055800 | 6.20455900  | C | 1.19845700 | 12.08268500 | 7.11981300  |
| H | 2.32685900 | 12.62295500 | 5.18809900  | H | 1.33693000 | 11.68539000 | 6.10764100  |
| H | 0.90624000 | 12.81127400 | 6.22269600  | H | 0.15289400 | 11.91471700 | 7.40366500  |
| H | 2.28415900 | 13.90943100 | 6.40998300  | H | 1.36419300 | 13.16573400 | 7.08657800  |
| C | 6.91709500 | 10.25071500 | 9.27058000  | C | 6.95349800 | 10.56868500 | 9.30828200  |
| H | 7.01295300 | 10.80114400 | 10.21069100 | H | 6.92322900 | 11.20465500 | 10.19602500 |
| H | 7.94539600 | 10.03933900 | 8.94489800  | H | 7.97908600 | 10.63801000 | 8.90775200  |
| C | 6.05279000 | 8.13184800  | 8.42893000  | C | 7.03302400 | 8.22425400  | 8.76952700  |
| H | 5.85336700 | 8.76992600  | 7.56462300  | H | 6.70627000 | 8.61576100  | 7.79973800  |
| H | 6.99680500 | 7.60524700  | 8.21656300  | H | 8.12933600 | 8.10633400  | 8.71982400  |
| C | 4.92082700 | 7.13340800  | 8.55240300  | C | 6.38486600 | 6.87476200  | 8.97439300  |
| C | 3.70425100 | 7.49334400  | 9.14772200  | C | 4.99993800 | 6.78707400  | 9.17225100  |
| H | 3.61578800 | 8.47937800  | 9.59235300  | H | 4.42322400 | 7.70585500  | 9.23601800  |
| C | 2.63556800 | 6.59749000  | 9.18289900  | C | 4.37763000 | 5.54446300  | 9.28327300  |
| H | 1.69840800 | 6.89410800  | 9.64749200  | H | 3.30179800 | 5.48870000  | 9.43043600  |
| C | 2.76566900 | 5.32344900  | 8.62385100  | C | 5.13511700 | 4.37147100  | 9.20084500  |
| H | 1.93256000 | 4.62599400  | 8.65032900  | H | 4.65053900 | 3.40202600  | 9.28475300  |
| C | 3.97717700 | 4.94980700  | 8.03979400  | C | 6.51736500 | 4.45268100  | 9.02165900  |
| H | 4.09491700 | 3.95601700  | 7.61494800  | H | 7.11378500 | 3.54478800  | 8.97365300  |
| C | 5.04617900 | 5.84798800  | 8.01139200  | C | 7.14117200 | 5.69892600  | 8.91511500  |
| H | 5.99277800 | 5.54617000  | 7.56814800  | H | 8.21998300 | 5.77250700  | 8.79782300  |
| C | 6.83503900 | 8.27765500  | 10.69049300 | C | 7.22109600 | 8.92855200  | 11.08909000 |
| H | 6.24411600 | 7.36823900  | 10.85763600 | H | 7.06076300 | 7.86146100  | 11.28762000 |
| H | 7.84909600 | 7.95562800  | 10.39780800 | H | 8.31471100 | 9.08497100  | 11.10490800 |
| C | 6.90994900 | 9.07540000  | 11.97090300 | C | 6.54664800 | 9.74662800  | 12.17319100 |
| C | 5.74309300 | 9.50876900  | 12.61452000 | C | 5.14696600 | 9.82477100  | 12.22271500 |
| H | 4.77801800 | 9.26376000  | 12.17780300 | H | 4.56902100 | 9.28024200  | 11.48248800 |

|   |             |             |             |   |             |             |             |
|---|-------------|-------------|-------------|---|-------------|-------------|-------------|
| C | 5.82003000  | 10.25606700 | 13.79047400 | C | 4.50804800  | 10.59697600 | 13.19260400 |
| H | 4.91148800  | 10.60095700 | 14.27672800 | H | 3.42224200  | 10.65258800 | 13.20956200 |
| C | 7.06662700  | 10.58427700 | 14.33417700 | C | 5.26051600  | 11.29943200 | 14.13901600 |
| H | 7.12359100  | 11.17374000 | 15.24537800 | H | 4.76637600  | 11.91627000 | 14.88420300 |
| C | 8.23225700  | 10.15565400 | 13.69911600 | C | 6.65306100  | 11.21594000 | 14.10820300 |
| H | 9.20711800  | 10.41087300 | 14.10748100 | H | 7.24863800  | 11.76831300 | 14.83033600 |
| C | 8.15096700  | 9.40681900  | 12.52327500 | C | 7.28923100  | 10.44933500 | 13.12817700 |
| H | 9.05503200  | 9.09130800  | 12.01176500 | H | 8.37274400  | 10.41197300 | 13.09580400 |
| C | 5.85177100  | 9.27841600  | 4.85927100  | C | 5.41351200  | 8.99355200  | 5.04037900  |
| H | 5.60443500  | 10.06503100 | 5.57414000  | H | 5.28539000  | 10.01679600 | 5.39194400  |
| H | 5.93103200  | 9.72584100  | 3.85874800  | H | 5.31595500  | 8.96024800  | 3.94363300  |
| C | 4.88625700  | 8.09541800  | 4.86008500  | C | 4.49072700  | 7.98485600  | 5.71747800  |
| H | 4.01774000  | 8.26665300  | 4.21684700  | H | 3.49033700  | 7.95789700  | 5.27384800  |
| H | 4.52442200  | 7.89021100  | 5.87245300  | H | 4.38961500  | 8.24404200  | 6.77556400  |
| C | 5.78916300  | 6.95150700  | 4.37066000  | C | 5.26606500  | 6.66197900  | 5.54887200  |
| H | 5.87434000  | 6.97182400  | 3.27747700  | H | 4.94426100  | 6.13750400  | 4.64281300  |
| H | 5.42605800  | 5.96315100  | 4.66722700  | H | 5.12444200  | 5.99179200  | 6.40035900  |
| C | 7.13545000  | 7.28958200  | 5.02128100  | C | 6.73828600  | 7.11605400  | 5.41111300  |
| H | 8.00528200  | 7.01286500  | 4.41988000  | H | 7.18398700  | 6.77311100  | 4.47165800  |
| H | 7.23442500  | 6.81001500  | 6.00187600  | H | 7.36349500  | 6.80170200  | 6.24787900  |
| H | 9.90021800  | 8.69992200  | 9.00181000  | H | 10.07274100 | 7.49534700  | 7.32798700  |
| O | 9.43992600  | 8.11853100  | 8.29447000  | O | 9.81871200  | 7.89588900  | 6.44168600  |
| C | 10.27924400 | 7.02717300  | 7.98345000  | C | 10.48229700 | 7.22927500  | 5.38465300  |
| H | 11.17036000 | 7.02742600  | 8.62146000  | H | 11.57337600 | 7.35556100  | 5.47128800  |
| H | 8.99611700  | 12.55151900 | 8.24678800  | H | 10.18518600 | 12.74809800 | 7.86092600  |
| O | 9.38508400  | 13.17798300 | 8.96284200  | O | 10.05803300 | 12.94061600 | 8.82467200  |
| C | 8.34144400  | 14.01726600 | 9.41388500  | C | 8.87724800  | 13.72608200 | 8.92861000  |
| H | 7.57439700  | 14.13324100 | 8.64144800  | H | 8.15965000  | 13.40858200 | 8.16666800  |
| C | 8.90475800  | 15.38816600 | 9.79552800  | C | 9.17830100  | 15.22129900 | 8.78237600  |
| H | 9.35226300  | 15.84658600 | 8.90856500  | H | 9.61994000  | 15.40216600 | 7.79687600  |
| H | 8.11814700  | 16.04012100 | 10.18740500 | H | 8.26290800  | 15.81221600 | 8.87555200  |
| H | 9.67782100  | 15.27350500 | 10.56186100 | H | 9.88887900  | 15.54245700 | 9.55044200  |
| C | 9.52965200  | 5.70134500  | 8.16150700  | C | 10.16581500 | 5.73331700  | 5.32864900  |
| H | 8.64154100  | 5.68262600  | 7.52207000  | H | 9.10266600  | 5.56252200  | 5.14699900  |
| H | 10.16620600 | 4.85046700  | 7.90263400  | H | 10.74420400 | 5.24927000  | 4.53742400  |
| H | 9.21091000  | 5.61645600  | 9.20395400  | H | 10.43234600 | 5.27716800  | 6.28662900  |
| C | 10.76524300 | 7.16486400  | 6.54463100  | C | 10.10265100 | 7.98507900  | 4.11759900  |
| C | 7.67233500  | 13.39139400 | 10.63273700 | C | 8.22739600  | 13.43008600 | 10.26837400 |
| O | 10.33404500 | 7.97292000  | 5.73776400  | O | 9.73798900  | 9.14954000  | 4.09752300  |
| O | 11.73014000 | 6.28461200  | 6.24637900  | O | 10.23554800 | 7.25246400  | 3.00408200  |
| C | 12.21323000 | 6.32461600  | 4.89071900  | C | 9.93994600  | 7.94044000  | 1.77291100  |
| H | 12.44669800 | 7.35776300  | 4.61967300  | H | 10.57730200 | 8.82503700  | 1.69924300  |
| O | 8.22237800  | 12.60914700 | 11.39280900 | O | 8.73375800  | 12.78289200 | 11.17122100 |
| O | 6.40662200  | 13.79491100 | 10.77204800 | O | 6.99210400  | 13.93542600 | 10.31136200 |
| C | 5.67939900  | 13.27067900 | 11.89823700 | C | 6.22177000  | 13.71361700 | 11.50911300 |
| H | 5.91375500  | 12.20953400 | 12.01847600 | H | 6.38810000  | 12.69474400 | 11.86743200 |
| C | 13.46107800 | 5.45320900  | 4.83237900  | C | 10.21402800 | 6.95216300  | 0.64780600  |
| H | 13.86604800 | 5.46067400  | 3.81712500  | H | 10.02753700 | 7.42818600  | -0.31960500 |
| H | 14.21339200 | 5.84946000  | 5.51990700  | H | 11.25633600 | 6.62285700  | 0.68751700  |
| H | 13.22788800 | 4.42283900  | 5.11822000  | H | 9.56259700  | 6.07930700  | 0.74923300  |
| C | 11.10883000 | 5.83396800  | 3.95398800  | C | 8.47364300  | 8.38148000  | 1.76830700  |
| O | 11.48177800 | 6.01702900  | 2.67344200  | O | 8.33058700  | 9.50945800  | 1.05667900  |
| O | 10.05623200 | 5.34361600  | 4.29514800  | O | 7.56764200  | 7.76326300  | 2.27919100  |
| C | 10.50772200 | 5.62736200  | 1.68743300  | C | 6.97983100  | 10.00733600 | 0.96172400  |
| H | 9.59602300  | 6.22018800  | 1.80423500  | H | 6.60249400  | 10.24902800 | 1.95766000  |
| H | 10.97390700 | 5.82535000  | 0.72220600  | H | 7.04302500  | 10.90488400 | 0.34684200  |
| H | 10.26036900 | 4.56744900  | 1.78940600  | H | 6.33007500  | 9.26098000  | 0.49666400  |
| C | 4.19962500  | 13.46403800 | 11.59836400 | C | 4.75871200  | 13.91542100 | 11.13849100 |

|   |            |             |             |
|---|------------|-------------|-------------|
| H | 3.95619400 | 12.94592400 | 10.66801000 |
| H | 3.60017100 | 13.04996300 | 12.41276700 |
| H | 3.96100100 | 14.52596700 | 11.48236600 |
| C | 6.14658400 | 13.99036600 | 13.16062500 |
| O | 6.98993200 | 14.85538900 | 13.20822000 |
| O | 5.47866400 | 13.51645300 | 14.23148700 |
| C | 5.87512700 | 14.07476700 | 15.49695100 |
| H | 5.23769100 | 13.59560500 | 16.24042100 |
| H | 6.92865300 | 13.85561900 | 15.69227600 |
| H | 5.72940800 | 15.15825100 | 15.50180800 |

|   |             |             |             |
|---|-------------|-------------|-------------|
| H | 4.49822800  | 13.22731900 | 10.33022200 |
| H | 4.13163100  | 13.70267500 | 12.00705000 |
| H | 4.57890000  | 14.94172200 | 10.80283000 |
| C | 6.72406900  | 14.67410000 | 12.58427100 |
| O | 7.62546700  | 15.46962600 | 12.44964800 |
| O | 6.01851200  | 14.50758700 | 13.71915700 |
| C | 6.42960600  | 15.33234200 | 14.82413100 |
| H | 5.76611400  | 15.06829100 | 15.64797100 |
| H | 7.47134300  | 15.12578000 | 15.08505700 |
| H | 6.32958700  | 16.39131500 | 14.57080800 |
| C | 10.35629500 | 13.28930200 | 5.12678500  |
| H | 11.44765100 | 13.30839700 | 5.05550200  |
| H | 9.99665100  | 14.31229300 | 5.30510100  |
| H | 9.94664300  | 12.93664300 | 4.17098800  |
| C | 11.60696800 | 6.24044600  | 8.91773400  |
| H | 11.42850200 | 5.25730400  | 8.46898500  |
| H | 11.89915700 | 6.10400800  | 9.96316500  |
| H | 12.43761800 | 6.73086500  | 8.39180900  |
| O | 10.00907900 | 12.41107200 | 6.18928900  |
| H | 9.00956300  | 12.31903100 | 6.27520100  |
| O | 10.39662700 | 6.98953900  | 8.81964000  |
| H | 10.47299700 | 7.83201200  | 9.38237500  |

3

4

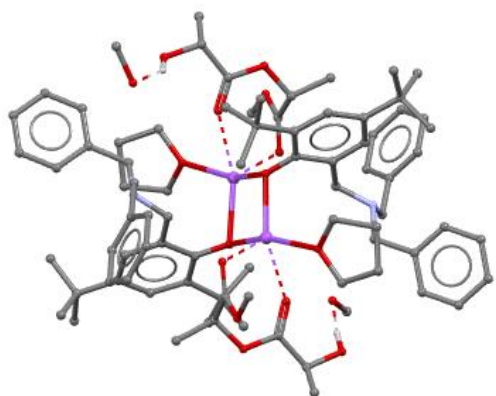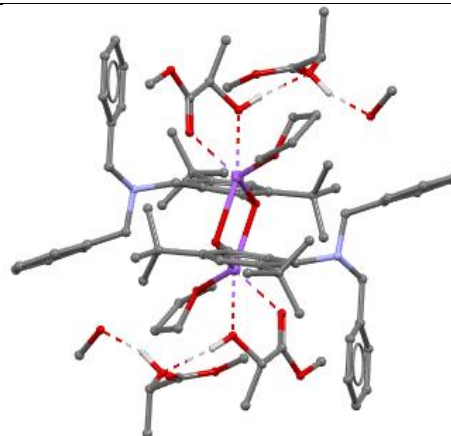

|   |             |             |             |
|---|-------------|-------------|-------------|
| O | -0.14188000 | -1.32309700 | -1.02685300 |
| N | 2.36800200  | -3.56435800 | 1.44720500  |
| C | 0.44068800  | -2.38339800 | -1.55168600 |
| C | 0.42528100  | -2.67416900 | -2.95835200 |
| C | 1.04621100  | -3.84705200 | -3.41258200 |
| H | 1.01952200  | -4.05761400 | -4.47264900 |
| C | 1.70670800  | -4.75700900 | -2.57686200 |
| C | 1.73498200  | -4.44702900 | -1.21392800 |
| H | 2.23442700  | -5.10201900 | -0.50695300 |
| C | 1.13573200  | -3.30148900 | -0.70133600 |
| C | -0.24485800 | -1.70770400 | -3.95433600 |
| C | -0.11820600 | -2.17754300 | -5.41754300 |
| H | -0.59908300 | -3.14920200 | -5.58145500 |
| H | -0.61114500 | -1.45169000 | -6.07531400 |
| H | 0.92820700  | -2.25609300 | -5.73572300 |
| C | -1.74965000 | -1.57706000 | -3.63875600 |
| H | -1.89242100 | -1.19893700 | -2.62763300 |
| H | -2.24446500 | -0.89678500 | -4.34088000 |
| H | -2.23632800 | -2.55925800 | -3.71901600 |
| C | 0.40688600  | -0.30906300 | -3.86515300 |

|   |             |             |             |
|---|-------------|-------------|-------------|
| O | 0.10782000  | -0.89005600 | -1.25024200 |
| N | 3.53021700  | -1.66860700 | 1.03870100  |
| C | 1.09897600  | -1.48887000 | -1.86876100 |
| C | 1.07455500  | -1.79137800 | -3.27097900 |
| C | 2.23081600  | -2.31538600 | -3.86963400 |
| H | 2.20132800  | -2.52785600 | -4.92961000 |
| C | 3.41577300  | -2.59183900 | -3.17036100 |
| C | 3.39862400  | -2.35663700 | -1.78638000 |
| H | 4.27552500  | -2.56734500 | -1.18003800 |
| C | 2.27828800  | -1.85365300 | -1.13748600 |
| C | -0.20760400 | -1.53764400 | -4.09052900 |
| C | -0.08970600 | -2.04156500 | -5.54200600 |
| H | 0.12730300  | -3.11550500 | -5.58042400 |
| H | -1.03941600 | -1.87427600 | -6.06483200 |
| H | 0.68985000  | -1.50960700 | -6.10074400 |
| C | -1.40070800 | -2.28221900 | -3.44535500 |
| H | -1.50189800 | -2.00319800 | -2.39527500 |
| H | -2.33594100 | -2.04572500 | -3.97145900 |
| H | -1.24871500 | -3.36239400 | -3.51674400 |
| C | -0.52049100 | -0.02640300 | -4.12792800 |

|    |             |             |             |    |             |             |             |
|----|-------------|-------------|-------------|----|-------------|-------------|-------------|
| H  | 1.48153900  | -0.36015500 | -4.07409300 | H  | 0.31625800  | 0.53931900  | -4.55240500 |
| H  | -0.04477200 | 0.36077400  | -4.60662800 | H  | -1.41240800 | 0.16677900  | -4.74197600 |
| H  | 0.26677400  | 0.13174400  | -2.87853300 | H  | -0.70081300 | 0.35043000  | -3.12220800 |
| C  | 2.38691800  | -6.03842100 | -3.08227700 | C  | 4.66611500  | -3.19702200 | -3.82990400 |
| C  | 3.90107600  | -5.97659700 | -2.77191600 | C  | 5.88342000  | -2.26971400 | -3.61116100 |
| H  | 4.08890000  | -5.86868700 | -1.69873300 | H  | 6.06959400  | -2.09570100 | -2.54546400 |
| H  | 4.40924500  | -6.88826600 | -3.11305300 | H  | 6.79346700  | -2.70821600 | -4.04133200 |
| H  | 4.36254200  | -5.11824100 | -3.27376100 | H  | 5.71651100  | -1.29761200 | -4.08842500 |
| C  | 1.77283300  | -7.26614000 | -2.36861100 | C  | 4.96949200  | -4.57658800 | -3.19642800 |
| H  | 0.70058400  | -7.34159700 | -2.58651400 | H  | 4.13390900  | -5.26686700 | -3.35923500 |
| H  | 2.25554100  | -8.19440800 | -2.70158300 | H  | 5.86996200  | -5.02227800 | -3.63930400 |
| H  | 1.88624600  | -7.19997800 | -1.28126700 | H  | 5.13310100  | -4.49546000 | -2.11617200 |
| C  | 2.21893400  | -6.23652000 | -4.59980200 | C  | 4.49227000  | -3.40055200 | -5.34625400 |
| H  | 2.67154400  | -5.41500000 | -5.16695300 | H  | 4.28893200  | -2.45309600 | -5.85874000 |
| H  | 2.70901100  | -7.16610900 | -4.91294200 | H  | 5.40874400  | -3.82300300 | -5.77535000 |
| H  | 1.16220800  | -6.30370400 | -4.88333200 | H  | 3.67112600  | -4.09089100 | -5.56908000 |
| C  | 1.15357700  | -3.06870000 | 0.79580200  | C  | 2.21845000  | -1.76268400 | 0.37499200  |
| H  | 0.30211600  | -3.57600900 | 1.25427000  | H  | 1.71161300  | -2.66138900 | 0.74343500  |
| H  | 0.99369600  | -2.00083200 | 1.02984000  | H  | 1.59368600  | -0.91351300 | 0.68664700  |
| C  | 3.47205400  | -2.62555500 | 1.24025600  | C  | 3.92501200  | -0.25717500 | 1.09220800  |
| H  | 3.39379900  | -2.29260000 | 0.20121100  | H  | 3.69356800  | 0.17366700  | 0.11449100  |
| H  | 3.36015200  | -1.72379500 | 1.86182100  | H  | 3.31013200  | 0.29028800  | 1.83553900  |
| C  | 4.84324600  | -3.22766200 | 1.45101500  | C  | 5.39376200  | -0.04942700 | 1.37592500  |
| C  | 5.12917200  | -4.52627200 | 1.00805400  | C  | 6.33318800  | -0.27209800 | 0.35781700  |
| H  | 4.32859500  | -5.11431400 | 0.57092300  | H  | 5.98092300  | -0.61773800 | -0.61065900 |
| C  | 6.41519800  | -5.05298400 | 1.12639600  | C  | 7.69095800  | -0.05558700 | 0.58221200  |
| H  | 6.62055000  | -6.06078800 | 0.77360000  | H  | 8.40578700  | -0.22644400 | -0.21851800 |
| C  | 7.43790500  | -4.28668200 | 1.69179500  | C  | 8.13464000  | 0.38308900  | 1.83525600  |
| H  | 8.44110200  | -4.69523400 | 1.78335500  | H  | 9.19363000  | 0.55353600  | 2.00943100  |
| C  | 7.16049500  | -2.99441900 | 2.14238400  | C  | 7.21316100  | 0.59368200  | 2.86065100  |
| H  | 7.94756100  | -2.39254400 | 2.59022100  | H  | 7.55016700  | 0.92058800  | 3.84092100  |
| C  | 5.87059700  | -2.46951800 | 2.02781300  | C  | 5.84992100  | 0.37442200  | 2.63060600  |
| H  | 5.66512100  | -1.45974000 | 2.37500000  | H  | 5.13315300  | 0.52581300  | 3.43621000  |
| C  | 2.13367600  | -3.87529800 | 2.85700000  | C  | 3.52316600  | -2.26944700 | 2.37076600  |
| H  | 3.10733600  | -4.09917000 | 3.31000200  | H  | 4.49373300  | -2.05076200 | 2.83538600  |
| H  | 1.71830100  | -3.00978400 | 3.40475600  | H  | 2.75498400  | -1.80890000 | 3.02163700  |
| C  | 1.20822400  | -5.06631900 | 3.00169300  | C  | 3.32281300  | -3.77282700 | 2.36068900  |
| C  | 1.54567900  | -6.28847000 | 2.40293600  | C  | 3.69397000  | -4.56153600 | 1.26370300  |
| H  | 2.48195500  | -6.36249700 | 1.85704600  | H  | 4.11425700  | -4.07851000 | 0.38903000  |
| C  | 0.68993700  | -7.38579400 | 2.49163100  | C  | 3.49638900  | -5.94342400 | 1.28181900  |
| H  | 0.96544400  | -8.32630600 | 2.02131000  | H  | 3.77791500  | -6.53606500 | 0.41506600  |
| C  | -0.52419800 | -7.27538800 | 3.17778700  | C  | 2.93402100  | -6.56269600 | 2.40123800  |
| H  | -1.19491900 | -8.12824100 | 3.24177500  | H  | 2.77389800  | -7.63746800 | 2.41123900  |
| C  | -0.87160900 | -6.06161900 | 3.77196500  | C  | 2.57591300  | -5.78688700 | 3.50546900  |
| H  | -1.81711000 | -5.96382700 | 4.30050000  | H  | 2.12678200  | -6.25290100 | 4.37810100  |
| C  | -0.00925600 | -4.96513200 | 3.68196600  | C  | 2.76812300  | -4.40457900 | 3.47982000  |
| H  | -0.29550000 | -4.01284300 | 4.12106500  | H  | 2.47384600  | -3.80213900 | 4.33622700  |
| Na | -1.71835900 | -0.86819800 | 0.56812700  | Na | -0.72919000 | -1.35609500 | 0.79945400  |
| O  | -4.03366400 | -0.33098800 | 1.52995600  | O  | -2.95457400 | -1.59221300 | 1.58224100  |
| C  | -4.23441200 | 0.49618900  | 2.68712600  | C  | -3.31828900 | -1.16469300 | 2.90699100  |
| H  | -3.28029600 | 0.95830800  | 2.93590300  | H  | -3.05949100 | -0.11201900 | 2.99884700  |
| H  | -4.57757800 | -0.12372300 | 3.53372500  | H  | -2.73109200 | -1.74387000 | 3.63386800  |
| C  | -5.30396300 | 1.49533800  | 2.25427800  | C  | -4.82510300 | -1.46493100 | 3.02120900  |
| H  | -5.82738600 | 1.94983900  | 3.10116900  | H  | -5.08967100 | -1.81645500 | 4.02334800  |
| H  | -4.82803900 | 2.29480400  | 1.68233400  | H  | -5.41014500 | -0.56395500 | 2.82211100  |
| C  | -6.22539000 | 0.63960600  | 1.35755500  | C  | -5.07986300 | -2.53624100 | 1.92469400  |
| H  | -7.10050300 | 0.28536500  | 1.91280100  | H  | -5.54357900 | -3.44775700 | 2.31482300  |
| H  | -6.58757000 | 1.20075400  | 0.49211100  | H  | -5.73399700 | -2.13135400 | 1.14623200  |

|   |             |             |             |   |             |             |             |
|---|-------------|-------------|-------------|---|-------------|-------------|-------------|
| C | -5.33075800 | -0.55123900 | 0.93454400  | C | -3.67699000 | -2.80558200 | 1.35727400  |
| H | -5.73768600 | -1.50530100 | 1.30198900  | H | -3.18092500 | -3.63203700 | 1.88721200  |
| H | -5.18197700 | -0.64132500 | -0.13996800 | H | -3.64932000 | -3.01843600 | 0.28828100  |
| H | -4.74873300 | -1.24345000 | -3.17136900 | H | -2.97205300 | -4.24260000 | -1.63287500 |
| O | -5.37651700 | -1.76625400 | -2.62686700 | O | -2.42574300 | -5.00442200 | -1.33731000 |
| C | -4.88122200 | -3.05374700 | -2.35813500 | C | -2.10514600 | -5.79162400 | -2.47805200 |
| H | -4.48275000 | -3.53646100 | -3.26403600 | H | -2.62279200 | -5.41065000 | -3.36559000 |
| C | -6.03685800 | -3.89221900 | -1.80459000 | C | -2.51330700 | -7.24674800 | -2.23104500 |
| H | -6.42218400 | -3.42999600 | -0.88938600 | H | -2.00497700 | -7.63425100 | -1.34221300 |
| H | -5.70934100 | -4.90967200 | -1.57901600 | H | -2.25372700 | -7.87320300 | -3.09046400 |
| H | -6.84308600 | -3.92042100 | -2.54265800 | H | -3.59294000 | -7.30023000 | -2.05913500 |
| C | -3.73943900 | -3.01022200 | -1.34117900 | O | -0.16423000 | -5.91486300 | -3.92158200 |
| O | -3.34197200 | -1.99919400 | -0.79585500 | C | -0.28546600 | -4.65780300 | 1.48053300  |
| O | -3.24045400 | -4.23086500 | -1.08965300 | H | 0.78500000  | -4.89566700 | 1.37072700  |
| C | -2.14567800 | -4.26625500 | -0.13533900 | C | -1.07124400 | -5.96825600 | 1.47006700  |
| H | -1.35232300 | -3.61738800 | -0.50398700 | H | -0.73574300 | -6.61679500 | 2.28266800  |
| C | -1.65756200 | -5.70234200 | -0.04029800 | H | -0.90086500 | -6.47202600 | 0.51625800  |
| H | -0.82211700 | -5.76284100 | 0.66218300  | H | -2.14445000 | -5.78278000 | 1.57214500  |
| H | -1.30180900 | -6.02524400 | -1.02226800 | C | -0.38862300 | -3.88298900 | 2.78970600  |
| H | -2.45846400 | -6.36422900 | 0.30105500  | O | -0.47839100 | -4.67309400 | 3.87074100  |
| C | -2.59021300 | -3.71293300 | 1.21780500  | O | -0.36515700 | -2.66842300 | 2.86188600  |
| O | -3.79181800 | -4.15800100 | 1.59537300  | C | -0.51623300 | -3.98446700 | 5.13508100  |
| O | -1.91025800 | -2.95813700 | 1.89115400  | H | 0.35423600  | -3.33306300 | 5.24348300  |
| C | -4.27603100 | -3.61306300 | 2.84379500  | H | -0.51517800 | -4.76789100 | 5.89309100  |
| H | -3.65954300 | -3.97427100 | 3.67144700  | H | -1.42223300 | -3.37656900 | 5.20956900  |
| H | -5.29975500 | -3.97424400 | 2.93926000  | C | -5.58218300 | -3.84543100 | -1.74859700 |
| H | -4.23795500 | -2.52236900 | 2.80492300  | H | -5.50209800 | -4.91141100 | -1.97356000 |
| C | -5.50648700 | -0.25828600 | -5.42607400 | H | -5.78104800 | -3.72435300 | -0.67641300 |
| H | -5.11858100 | -1.13404500 | -5.95230200 | H | -6.41261600 | -3.41137700 | -2.31663600 |
| H | -6.45487000 | -0.52737900 | -4.94328300 | O | -4.33654200 | -3.25538100 | -2.12935900 |
| H | -5.68259600 | 0.54215700  | -6.15659800 | H | -4.39529800 | -2.29563400 | -1.99761000 |
| O | -4.51507100 | 0.11582900  | -4.46737800 | O | -0.04536600 | 0.87271900  | 1.32334400  |
| H | -4.84682600 | 0.89781900  | -3.99282200 | N | -3.46761100 | 1.65151500  | -0.96590500 |
| O | -0.32808800 | 0.86199600  | 1.33414900  | C | -1.03653900 | 1.47166900  | 1.94171800  |
| N | -2.72441700 | 2.48327000  | -1.73740400 | C | -1.01222400 | 1.77439700  | 3.34387900  |
| C | -1.07155400 | 1.91680900  | 1.61919500  | C | -2.16848500 | 2.29862800  | 3.94233800  |
| C | -1.21364100 | 2.45179700  | 2.94431400  | H | -2.13908300 | 2.51124900  | 5.00228700  |
| C | -2.01556700 | 3.58797200  | 3.14032000  | C | -3.35334700 | 2.57508100  | 3.24290900  |
| H | -2.10319000 | 3.98166500  | 4.14363400  | C | -3.33610400 | 2.33962500  | 1.85897000  |
| C | -2.70173500 | 4.24230700  | 2.11201100  | H | -4.21295000 | 2.55023200  | 1.25251900  |
| C | -2.56305900 | 3.70242600  | 0.82775300  | C | -2.21576500 | 1.83639100  | 1.21028800  |
| H | -3.08051500 | 4.15177000  | -0.01361400 | C | 0.26985500  | 1.52073200  | 4.16357200  |
| C | -1.78830600 | 2.57784200  | 0.57074500  | C | 0.15174300  | 2.02460200  | 5.61504400  |
| C | -0.42397300 | 1.84948300  | 4.12329400  | H | -0.06532100 | 3.09853200  | 5.65348100  |
| C | -0.81040200 | 2.45700700  | 5.48580700  | H | 1.10138800  | 1.85734000  | 6.13799800  |
| H | -0.58904500 | 3.52856600  | 5.54017600  | H | -0.62787300 | 1.49259800  | 6.17365700  |
| H | -0.23692100 | 1.96537700  | 6.28119300  | C | 1.46291000  | 2.26547000  | 3.51851200  |
| H | -1.87523500 | 2.31625600  | 5.70578300  | H | 1.56432200  | 1.98639500  | 2.46847000  |
| C | 1.07119000  | 2.14737500  | 3.87792400  | H | 2.39812300  | 2.02923500  | 4.04478300  |
| H | 1.37784100  | 1.69053200  | 2.93721600  | H | 1.31062800  | 3.34561000  | 3.58973700  |
| H | 1.70168900  | 1.75998700  | 4.68890800  | C | 0.58291300  | 0.00952100  | 4.20097700  |
| H | 1.24044200  | 3.22810800  | 3.80845800  | H | -0.25391800 | -0.55634500 | 4.62509500  |
| C | -0.63556000 | 0.31953400  | 4.23052200  | H | 1.47463000  | -0.18358400 | 4.81534500  |
| H | -1.68783700 | 0.08194900  | 4.42638700  | H | 0.76368800  | -0.36718600 | 3.19528800  |
| H | -0.05202500 | -0.09025900 | 5.06684600  | C | -4.60374800 | 3.18036500  | 3.90223700  |
| H | -0.35200800 | -0.17511700 | 3.29918100  | C | -5.82101900 | 2.25301000  | 3.68347100  |
| C | -3.53926100 | 5.51477400  | 2.31681900  | H | -6.00717700 | 2.07899100  | 2.61777600  |
| C | -4.99154000 | 5.28492900  | 1.83640000  | H | -6.73109100 | 2.69147200  | 4.11363000  |



|    |             |             |             |    |             |             |             |
|----|-------------|-------------|-------------|----|-------------|-------------|-------------|
| H  | -5.03109500 | 4.96727100  | 0.78888000  | H  | -5.65406600 | 1.28091800  | 4.16074900  |
| H  | -5.58017300 | 6.20699300  | 1.92869100  | C  | -4.90706000 | 4.55984100  | 3.26853800  |
| H  | -5.48023700 | 4.50975700  | 2.43686100  | H  | -4.07150000 | 5.25015100  | 3.43134100  |
| C  | -2.91513000 | 6.66732300  | 1.49379700  | H  | -5.80758200 | 5.00558900  | 3.71125100  |
| H  | -1.88187700 | 6.85220700  | 1.81062900  | H  | -5.07055000 | 4.47855600  | 2.18827600  |
| H  | -3.48616600 | 7.59601600  | 1.62370500  | C  | -4.43006600 | 3.38408600  | 5.41857900  |
| H  | -2.89808800 | 6.43102100  | 0.42415400  | H  | -4.22684600 | 2.43668600  | 5.93121500  |
| C  | -3.59098000 | 5.95352400  | 3.79159300  | H  | -5.34656300 | 3.80665300  | 5.84751400  |
| H  | -4.03338500 | 5.17722700  | 4.42674800  | H  | -3.60890600 | 4.07440600  | 5.64140800  |
| H  | -4.20392500 | 6.85693800  | 3.89284500  | C  | -2.15584000 | 1.74494500  | -0.30215600 |
| H  | -2.59262100 | 6.18396100  | 4.18105300  | H  | -1.64838700 | 2.64323000  | -0.67079000 |
| C  | -1.62919400 | 2.07630100  | -0.85108300 | H  | -1.53157400 | 0.89532100  | -0.61357900 |
| H  | -0.69793200 | 2.46868300  | -1.26279000 | C  | -3.86319900 | 0.24031800  | -1.01943200 |
| H  | -1.49621100 | 0.98282600  | -0.88485900 | H  | -3.63141400 | -0.19084300 | -0.04193700 |
| C  | -3.90671900 | 1.66496200  | -1.48899000 | H  | -3.24900100 | -0.30728100 | -1.76326100 |
| H  | -3.98576200 | 1.55316600  | -0.40211500 | C  | -5.33225000 | 0.03348000  | -1.30228300 |
| H  | -3.78767600 | 0.63743400  | -1.87963600 | C  | -6.27076300 | 0.25591300  | -0.28328100 |
| C  | -5.20097200 | 2.27055600  | -1.99853600 | H  | -5.91753800 | 0.60037000  | 0.68527200  |
| C  | -5.33630300 | 3.65403400  | -2.17934600 | C  | -7.62885900 | 0.04060400  | -0.50688200 |
| H  | -4.47565800 | 4.28851400  | -1.99483000 | H  | -8.34297900 | 0.21127800  | 0.29451900  |
| C  | -6.54810500 | 4.20234700  | -2.60049500 | C  | -8.07375800 | -0.39658900 | -1.76000500 |
| H  | -6.63292700 | 5.27748200  | -2.73676800 | H  | -9.13300100 | -0.56605200 | -1.93359600 |
| C  | -7.64792600 | 3.37749100  | -2.84948800 | C  | -7.15315600 | -0.60703900 | -2.78622200 |
| H  | -8.59053400 | 3.80607600  | -3.17930900 | H  | -7.49111200 | -0.93288700 | -3.76651700 |
| C  | -7.52489500 | 1.99841200  | -2.67336800 | C  | -5.78959200 | -0.38906800 | -2.55695300 |
| H  | -8.37295700 | 1.34513400  | -2.86264900 | H  | -5.07348600 | -0.54057000 | -3.36312100 |
| C  | -6.31108800 | 1.44715300  | -2.25223500 | C  | -3.46039200 | 2.25249800  | -2.29788900 |
| H  | -6.22799000 | 0.37193800  | -2.11377900 | H  | -4.43101100 | 2.03410800  | -2.76254100 |
| C  | -2.31378100 | 2.49914000  | -3.14098600 | H  | -2.69231400 | 1.79184100  | -2.94879800 |
| H  | -3.20557400 | 2.70798500  | -3.74694000 | C  | -3.25966700 | 3.75583100  | -2.28765000 |
| H  | -1.93960200 | 1.51463600  | -3.47166300 | C  | -3.63043000 | 4.54449500  | -1.19051200 |
| C  | -1.26588900 | 3.56322000  | -3.42397200 | H  | -4.05068800 | 4.06147900  | -0.31582200 |
| C  | -1.21400400 | 4.75011700  | -2.67976600 | C  | -3.43252300 | 5.92634600  | -1.20850100 |
| H  | -1.92557600 | 4.89510100  | -1.87360600 | H  | -3.71375000 | 6.51894100  | -0.34162000 |
| C  | -0.23799300 | 5.71355900  | -2.93823700 | C  | -2.87019600 | 6.54561400  | -2.32793200 |
| H  | -0.21117000 | 6.62425600  | -2.34457000 | H  | -2.70977500 | 7.62034200  | -2.33782700 |
| C  | 0.70111500  | 5.51146100  | -3.95299600 | C  | -2.51249700 | 5.76984500  | -3.43233500 |
| H  | 1.46250600  | 6.26090200  | -4.15349800 | H  | -2.06342200 | 6.23586400  | -4.30499200 |
| C  | 0.64721700  | 4.33958700  | -4.71049200 | C  | -2.70505400 | 4.38759000  | -3.40682200 |
| H  | 1.36654500  | 4.17156000  | -5.50867500 | H  | -2.41113000 | 3.78518400  | -4.26337300 |
| C  | -0.32639900 | 3.37500800  | -4.44332100 | Na | 0.79155700  | 1.33884800  | -0.72637300 |
| H  | -0.34801100 | 2.45894100  | -5.02613900 | O  | 3.01656200  | 1.57539800  | -1.50947800 |
| Na | 1.28785100  | 0.21098400  | -0.21738700 | C  | 3.38067200  | 1.14805400  | -2.83411600 |
| O  | 3.60910200  | -0.40899100 | -1.36718100 | H  | 3.11993800  | 0.09593700  | -2.92698600 |
| C  | 3.76175600  | -1.28411000 | -2.50120600 | H  | 2.79538400  | 1.72890500  | -3.56124000 |
| H  | 2.82883200  | -1.83304000 | -2.62300700 | C  | 4.88806500  | 1.44551800  | -2.94634000 |
| H  | 3.94867900  | -0.68533700 | -3.40836000 | H  | 5.15518300  | 1.79447900  | -3.94869200 |
| C  | 4.96316700  | -2.16130100 | -2.16220700 | H  | 5.47093600  | 0.54382700  | -2.74423400 |
| H  | 5.42549900  | -2.60344500 | -3.05035300 | C  | 5.14272200  | 2.51841200  | -1.85129900 |
| H  | 4.65677900  | -2.97705500 | -1.50168500 | H  | 5.60579900  | 3.42962300  | -2.24289800 |
| C  | 5.88992900  | -1.17470600 | -1.42721300 | H  | 5.79746600  | 2.11497500  | -1.07259900 |
| H  | 6.54944400  | -0.66682500 | -2.14050200 | C  | 3.73985400  | 2.78811400  | -1.28378400 |
| H  | 6.51419400  | -1.66717900 | -0.67710900 | H  | 3.24429500  | 3.61516600  | -1.81324300 |
| C  | 4.91118600  | -0.16943200 | -0.78321900 | H  | 3.71225100  | 3.00037400  | -0.21467800 |
| H  | 5.20379900  | 0.87219800  | -0.97611600 | H  | 3.03604600  | 4.22565900  | 1.70561900  |
| H  | 4.81590500  | -0.29466000 | 0.29587300  | O  | 2.48809300  | 4.98662300  | 1.41086100  |
| H  | 4.12940800  | 0.33407900  | 3.22984900  | C  | 2.16787600  | 5.77366900  | 2.55174200  |
| O  | 4.94382000  | 0.80256700  | 2.93790900  | H  | 2.68476100  | 5.39186700  | 3.43937400  |

|   |            |             |             |   |             |             |             |
|---|------------|-------------|-------------|---|-------------|-------------|-------------|
| C | 4.61595300 | 2.12264200  | 2.59542900  | C | 2.57735500  | 7.22861100  | 2.30572700  |
| H | 4.27679900 | 2.70285000  | 3.47116100  | H | 2.06978300  | 7.61704500  | 1.41685900  |
| C | 5.85953700 | 2.78948300  | 2.00317100  | H | 2.31787800  | 7.85479500  | 3.16537700  |
| H | 6.17629300 | 2.24935500  | 1.10489600  | H | 3.65711800  | 7.28133300  | 2.13435300  |
| H | 5.65925300 | 3.83230200  | 1.74456300  | O | 0.22631100  | 5.89920200  | 3.99418200  |
| H | 6.66967500 | 2.74369700  | 2.73612300  | C | 0.34859000  | 4.64057500  | -1.40684200 |
| C | 3.46593500 | 2.16030000  | 1.59200500  | H | -0.72172100 | 4.87901900  | -1.29683200 |
| O | 2.95779800 | 1.16680700  | 1.10556100  | C | 1.13509900  | 5.95059300  | -1.39623000 |
| O | 3.06155500 | 3.40924200  | 1.31440000  | H | 0.79975800  | 6.59948800  | -2.20862300 |
| C | 1.91882500 | 3.51406400  | 0.42164800  | H | 0.96522900  | 6.45423200  | -0.44227000 |
| H | 1.11085000 | 2.89462500  | 0.81470100  | H | 2.20817800  | 5.76457200  | -1.49858700 |
| C | 1.50245600 | 4.97468300  | 0.37663100  | C | 0.45118300  | 3.86595100  | -2.71619700 |
| H | 0.63530000 | 5.07976400  | -0.28166700 | O | 0.54164100  | 4.65621100  | -3.79706600 |
| H | 1.21914700 | 5.30179200  | 1.38082500  | O | 0.42699900  | 2.65141700  | -2.78864200 |
| H | 2.31755700 | 5.60035000  | 0.00194900  | C | 0.57907800  | 3.96782800  | -5.06154300 |
| C | 2.26094400 | 2.96731900  | -0.96397600 | H | -0.29174000 | 3.31691800  | -5.17007900 |
| O | 3.44259500 | 3.38288100  | -1.42090900 | H | 0.57844700  | 4.75140700  | -5.81939500 |
| O | 1.51576700 | 2.23404100  | -1.58759500 | H | 1.48474400  | 3.35944700  | -5.13617000 |
| C | 3.80327700 | 2.84832100  | -2.71978000 | C | 5.64573700  | 3.83176000  | 1.82043900  |
| H | 3.10821100 | 3.22341600  | -3.47523000 | H | 5.56493200  | 4.89726400  | 2.04739500  |
| H | 4.81631700 | 3.20472100  | -2.90481700 | H | 5.84350000  | 3.71276000  | 0.74780500  |
| H | 3.76046300 | 1.75741600  | -2.68594600 | H | 6.47718600  | 3.39746900  | 2.38681300  |
| C | 2.71879400 | -0.98539700 | 5.23153000  | O | 4.40109200  | 3.23976400  | 2.20150100  |
| H | 3.74767500 | -1.23632900 | 5.49897300  | H | 4.46158800  | 2.28009800  | 2.06975000  |
| H | 2.08558900 | -1.86566100 | 5.39899200  | O | 0.75489700  | 3.73254100  | -0.39588900 |
| H | 2.37293500 | -0.16411600 | 5.87275400  | H | 1.06376500  | 4.24187300  | 0.38396300  |
| O | 2.74162600 | -0.61373500 | 3.85504700  | C | 0.67480800  | 5.71206200  | 2.88357600  |
| H | 1.85148000 | -0.35886400 | 3.56434500  | O | -0.06779600 | 5.47129200  | 1.79081700  |
|   |            |             |             | C | -1.48557200 | 5.30489000  | 2.01124600  |
|   |            |             |             | H | -1.89334700 | 4.98886600  | 1.05355800  |
|   |            |             |             | H | -1.65655700 | 4.53771300  | 2.76511400  |
|   |            |             |             | H | -1.92590700 | 6.25325000  | 2.33346100  |
|   |            |             |             | O | -0.69211800 | -3.75029800 | 0.46925000  |
|   |            |             |             | H | -1.00167200 | -4.26013600 | -0.31000200 |
|   |            |             |             | C | -0.61230500 | -5.72894100 | -2.81059900 |
|   |            |             |             | O | 0.13069300  | -5.48890400 | -1.71795100 |
|   |            |             |             | C | 1.54837500  | -5.32231200 | -1.93887300 |
|   |            |             |             | H | 1.71903600  | -4.55392400 | -2.69157000 |
|   |            |             |             | H | 1.95670800  | -5.00793400 | -0.98086900 |
|   |            |             |             | H | 1.98840400  | -6.27019200 | -2.26290400 |

5

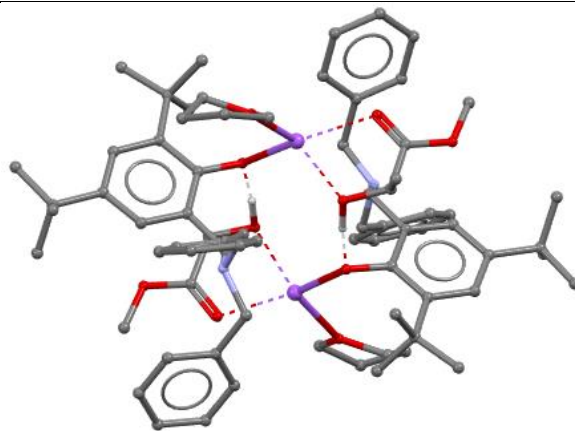

|    |             |             |             |   |             |            |            |
|----|-------------|-------------|-------------|---|-------------|------------|------------|
| Na | 10.20102600 | 11.27878500 | 10.54781000 | H | 16.83798500 | 7.49645800 | 9.98171800 |
| O  | 10.62521300 | 9.22079500  | 9.79984600  | H | 17.71635500 | 6.84085100 | 8.59132600 |

|    |             |             |             |   |             |             |             |
|----|-------------|-------------|-------------|---|-------------|-------------|-------------|
| O  | 12.31852500 | 12.12977400 | 11.14040000 | H | 16.21306800 | 6.07415300  | 9.12371500  |
| N  | 12.28200900 | 11.46000300 | 6.75106500  | C | 11.55571200 | 10.30198600 | 7.29121400  |
| C  | 11.86903400 | 8.91401000  | 9.42316300  | H | 11.26530400 | 9.70168400  | 6.42303400  |
| C  | 12.69772800 | 8.03314100  | 10.19246500 | H | 10.62674300 | 10.60679500 | 7.79329900  |
| C  | 13.99275300 | 7.75744900  | 9.73109000  | C | 12.41954600 | 12.51971200 | 7.74904300  |
| H  | 14.61218700 | 7.09512400  | 10.31936800 | H | 12.60877500 | 12.02124000 | 8.70509200  |
| C  | 14.52542500 | 8.28298200  | 8.54614300  | H | 11.48525600 | 13.08619100 | 7.88122900  |
| C  | 13.69301000 | 9.12117800  | 7.80192300  | C | 13.56706700 | 13.45983100 | 7.45962500  |
| H  | 14.03687100 | 9.55464900  | 6.86693300  | C | 14.83661900 | 12.94919900 | 7.15451400  |
| C  | 12.39988800 | 9.44028100  | 8.21005100  | H | 14.95680300 | 11.87275100 | 7.07975300  |
| C  | 12.16889600 | 7.38383500  | 11.49088100 | C | 15.92009800 | 13.80422300 | 6.96102600  |
| C  | 13.18983300 | 6.42486400  | 12.13667100 | H | 16.90003000 | 13.39215700 | 6.73309100  |
| H  | 13.45337200 | 5.59707100  | 11.46832100 | C | 15.74907600 | 15.18858500 | 7.06366600  |
| H  | 12.75613900 | 5.99131900  | 13.04557900 | H | 16.59317400 | 15.85631900 | 6.91233700  |
| H  | 14.11348300 | 6.93942200  | 12.42610400 | C | 14.48667100 | 15.70813700 | 7.35460800  |
| C  | 10.89975200 | 6.55077000  | 11.18760500 | H | 14.34246100 | 16.78336300 | 7.42506200  |
| H  | 10.13474300 | 7.15981700  | 10.70648700 | C | 13.40314700 | 14.84624500 | 7.54764900  |
| H  | 10.48308500 | 6.13331400  | 12.11315800 | H | 12.41779900 | 15.25154500 | 7.76973500  |
| H  | 11.14611300 | 5.71133200  | 10.52522200 | C | 11.67703400 | 11.94634700 | 5.50762100  |
| C  | 11.84785900 | 8.47068000  | 12.54438500 | H | 12.12941600 | 12.92126500 | 5.28706600  |
| H  | 12.76636400 | 8.96277000  | 12.88294400 | H | 10.59127100 | 12.11582600 | 5.61813200  |
| H  | 11.36152500 | 8.02583200  | 13.42215700 | C | 11.95205800 | 11.00018300 | 4.35640200  |
| H  | 11.18330900 | 9.23095400  | 12.13388100 | C | 13.27000300 | 10.59859700 | 4.09030700  |
| C  | 15.93821100 | 7.96036300  | 8.03542200  | H | 14.06738900 | 10.97672500 | 4.72368300  |
| C  | 16.74344700 | 9.27048300  | 7.87020000  | C | 13.55059800 | 9.73141100  | 3.03549700  |
| H  | 16.27472100 | 9.94086800  | 7.14217500  | H | 14.57785400 | 9.43487600  | 2.83731900  |
| H  | 17.76265100 | 9.06043300  | 7.52091200  | C | 12.51288000 | 9.24185000  | 2.23359100  |
| H  | 16.81055000 | 9.80776500  | 8.82344000  | H | 12.73020700 | 8.56268700  | 1.41311300  |
| C  | 15.83600600 | 7.25363900  | 6.66256000  | C | 11.19933100 | 9.63136500  | 2.49412000  |
| H  | 15.26650500 | 6.32102200  | 6.75321900  | H | 10.38489100 | 9.25187500  | 1.88242100  |
| H  | 16.83303300 | 7.01207900  | 6.27167200  | C | 10.92391200 | 10.50681500 | 3.54852000  |
| H  | 15.32909300 | 7.88443600  | 5.92412600  | H | 9.89842100  | 10.81191500 | 3.74163800  |
| C  | 16.71577600 | 7.03920800  | 8.99302100  | C | 13.52935100 | 11.40403100 | 11.43979700 |
| H  | 13.41987400 | 10.39949400 | 11.03137100 | C | 2.29966500  | 7.12757300  | 9.07760300  |
| H  | 13.65908800 | 11.34162100 | 12.53106200 | H | 1.36922900  | 7.54374200  | 9.45590700  |
| C  | 14.64051200 | 12.21906600 | 10.78770200 | C | 2.34386000  | 5.80198700  | 8.63479400  |
| H  | 15.62070100 | 12.02159400 | 11.23234500 | H | 1.45044000  | 5.18400400  | 8.66858200  |
| H  | 14.69870400 | 11.98578700 | 9.72123000  | C | 3.54453400  | 5.27482500  | 8.15726500  |
| C  | 14.16379300 | 13.66759800 | 11.00752600 | H | 3.59288000  | 4.24063800  | 7.82545000  |
| H  | 14.54566300 | 14.05709100 | 11.95757000 | C | 4.69118300  | 6.07273300  | 8.11716800  |
| H  | 14.48992700 | 14.33725000 | 10.20769000 | H | 5.62981900  | 5.65459700  | 7.75908700  |
| C  | 12.62539600 | 13.54084100 | 11.05660900 | C | 6.74139700  | 8.22466100  | 10.65660800 |
| H  | 12.19306300 | 14.05431200 | 11.92519400 | H | 6.06849100  | 7.36898500  | 10.79570100 |
| H  | 12.14484100 | 13.92144900 | 10.15148100 | H | 7.70966500  | 7.82215800  | 10.31163300 |
| Na | 8.59005900  | 9.46156600  | 6.35582600  | C | 6.92998600  | 8.94246500  | 11.97196400 |
| O  | 8.28229900  | 11.53822400 | 7.13119400  | C | 5.82899000  | 9.45841100  | 12.66710500 |
| O  | 6.62220600  | 8.88343500  | 5.22585000  | H | 4.83419500  | 9.32969800  | 12.24772600 |
| N  | 6.13433300  | 9.08273300  | 9.62836000  | C | 6.00943000  | 10.13426200 | 13.87477500 |
| C  | 7.01109000  | 11.87533300 | 7.36192700  | H | 5.14703000  | 10.52370100 | 14.41109000 |
| C  | 6.33777600  | 12.86642500 | 6.57848500  | C | 7.29463000  | 10.30984700 | 14.39826500 |
| C  | 5.01415900  | 13.19117900 | 6.90791300  | H | 7.43333400  | 10.83792800 | 15.33816600 |
| H  | 4.51194600  | 13.94259800 | 6.31502300  | C | 8.39613200  | 9.80086500  | 13.70880700 |
| C  | 4.30928300  | 12.60602400 | 7.96917100  | H | 9.40091800  | 9.93340300  | 14.10298300 |
| C  | 4.98843200  | 11.64502200 | 8.72215300  | C | 8.21114000  | 9.12102300  | 12.50327000 |
| H  | 4.50136900  | 11.15146000 | 9.55920000  | H | 9.06490100  | 8.73640600  | 11.95437000 |
| C  | 6.30104300  | 11.27285000 | 8.44145900  | C | 5.44602800  | 9.66436400  | 4.91474300  |
| C  | 7.06714200  | 13.58972900 | 5.42421600  | H | 5.43326500  | 10.52533100 | 5.58552700  |
| C  | 6.16004600  | 14.59691600 | 4.68916000  | H | 5.51460600  | 10.02121900 | 3.87705500  |

|   |            |             |             |   |             |             |             |
|---|------------|-------------|-------------|---|-------------|-------------|-------------|
| H | 5.80959100 | 15.39573800 | 5.35287100  | C | 4.27364300  | 8.70375500  | 5.09165300  |
| H | 6.72420500 | 15.06856600 | 3.87605200  | H | 3.39064800  | 9.01706900  | 4.52650400  |
| H | 5.28333700 | 14.11080700 | 4.24512300  | H | 3.99312300  | 8.62540300  | 6.14603400  |
| C | 8.27822600 | 14.38039800 | 5.97633300  | C | 4.86824300  | 7.37692500  | 4.58822300  |
| H | 8.97135400 | 13.72399700 | 6.50262100  | H | 4.77176100  | 7.30304300  | 3.49905800  |
| H | 8.82018300 | 14.87036200 | 5.15692300  | H | 4.38530500  | 6.50402000  | 5.03620500  |
| H | 7.94223000 | 15.16346700 | 6.66770200  | C | 6.34931000  | 7.48263600  | 4.99264000  |
| C | 7.56130500 | 12.57124400 | 4.37132400  | H | 7.03353500  | 7.10985400  | 4.22199400  |
| H | 6.71650800 | 12.05459600 | 3.90303700  | H | 6.55221400  | 6.94819000  | 5.92623800  |
| H | 8.12654600 | 13.08019100 | 3.57983500  | H | 9.71033800  | 8.47915600  | 8.78576000  |
| H | 8.21086000 | 11.83099300 | 4.83805900  | O | 9.19359400  | 7.94664100  | 8.07878000  |
| C | 2.86476500 | 12.98365700 | 8.33229700  | C | 9.98014800  | 6.83714900  | 7.68938200  |
| C | 1.95692700 | 11.73855700 | 8.20239900  | H | 10.81548100 | 6.69219000  | 8.37961400  |
| H | 2.28706000 | 10.92936300 | 8.86166900  | H | 9.04248500  | 12.32683900 | 8.24862600  |
| H | 0.91889800 | 11.98245600 | 8.46335000  | O | 9.46192500  | 12.87040900 | 9.00665600  |
| H | 1.97146900 | 11.35473100 | 7.17559700  | C | 8.52518400  | 13.82321700 | 9.47093100  |
| C | 2.82031600 | 13.49647000 | 9.79153400  | H | 7.72362200  | 13.97072400 | 8.74255000  |
| H | 3.47244500 | 14.36966900 | 9.91144900  | C | 9.23096100  | 15.15601100 | 9.73464900  |
| H | 1.79940300 | 13.78538700 | 10.07279600 | H | 9.66968700  | 15.51399200 | 8.79850300  |
| H | 3.15668600 | 12.72902800 | 10.49687300 | H | 8.52752400  | 15.90608900 | 10.11082000 |
| C | 2.29565100 | 14.08749200 | 7.42217200  | H | 10.03303800 | 15.02017800 | 10.46759500 |
| H | 2.27033300 | 13.77326400 | 6.37244600  | C | 9.11730400  | 5.57277600  | 7.65106000  |
| H | 1.26842600 | 14.32576100 | 7.72196800  | H | 8.28106600  | 5.71094200  | 6.95715200  |
| H | 2.88453600 | 15.00954800 | 7.48810200  | H | 9.70257100  | 4.70296100  | 7.33397200  |
| C | 6.97952200 | 10.25423300 | 9.33559500  | H | 8.71304500  | 5.38929200  | 8.65066100  |
| H | 7.20457600 | 10.71486900 | 10.30155000 | C | 10.57329900 | 7.10567600  | 6.30634200  |
| H | 7.94546400 | 9.96082000  | 8.90319800  | C | 7.88256300  | 13.31304900 | 10.75993100 |
| C | 5.86817500 | 8.29791300  | 8.42102700  | O | 10.04717100 | 7.82467800  | 5.46597400  |
| H | 5.69700100 | 9.01197500  | 7.61145900  | O | 11.72389700 | 6.46791500  | 6.11166600  |
| H | 6.74782100 | 7.70005600  | 8.13393700  | C | 12.41050900 | 6.76434900  | 4.87379700  |
| C | 4.65329400 | 7.40540100  | 8.54233700  | H | 12.61259700 | 7.83459100  | 4.80918200  |
| C | 3.44550400 | 7.92022200  | 9.03317500  | H | 13.34036600 | 6.19890500  | 4.91992300  |
| H | 3.42484100 | 8.94766300  | 9.38220500  | H | 11.80440800 | 6.45929700  | 4.01738200  |
| O | 8.40981100 | 12.50804500 | 11.51557000 | H | 5.00043000  | 13.86760900 | 12.09838700 |
| O | 6.68638600 | 13.85605200 | 10.97789900 | H | 5.85649200  | 12.28735200 | 12.07769300 |
| C | 5.96983900 | 13.37178700 | 12.13497000 | H | 6.50897500  | 13.62663400 | 13.05120000 |

**Table S11.** DFT optimized structures and atom coordinates of complexes for proposed polylactide degradation process by using sodium compounds.

**CheckCif Alert B explanation:**

B Alert explanation for  $[(2\text{-npL}^{\text{Bn}})\text{-Na(THF)}]_4$ :

**RINTA01\_ALERT\_3\_B** The value of Rint is greater than 0.18      Rint given   0.194

**PLAT020\_ALERT\_3\_B** The Value of Rint is Greater Than 0.12 .....      0.194 Report

**PLAT340\_ALERT\_3\_B** Low Bond Precision on C-C Bonds .....      0.01082 Ang.

**PLAT910\_ALERT\_3\_B** Missing # of FCF Reflection(s) Below Theta(Min).      26 Note

**RESPONSE:** Crystals diffracted weakly. Data was collected with radiation sources of Mo and Cu. All results were consistent with the model in this report (from the Mo data collection), however all yielded serious problems due to weak diffraction.

B Alert explanation for [(1-n0L<sup>Bn</sup>)-Na(THF)<sub>0.5</sub>]<sub>4</sub>:

**PLAT084\_ALERT\_3\_B** High wR2 Value (i.e. > 0.25) ..... 0.36 Report

**PLAT340\_ALERT\_3\_B** Low Bond Precision on C-C Bonds ..... 0.01652 Ang.

**RESPONSE:** Crystals diffracted weakly. Data was collected with radiation sources of Mo and Cu. All results were consistent with the model in this report (from the Cu data collection), however all yielded serious problems due to weak diffraction.
